# Supplementary material for: All-in-One van der Waals Material for Light Detection, Guiding and Modulation
Source: Research Square preprint supplement (doi:10.21203/rs.3.rs-6156048/v1), 2025-03-12
Supplement: Supplementary file 1 [file b354944d654cef6843f9af3f.docx]

Supplementary Information

**All-in-One van der Waals Material for Light Detection, Guiding and Modulation**

*Aleksandr Slavich1†, Georgy Ermolaev1†, Nikolay Pak2†, Dmitriy Grudinin1, Konstantin Kravtsov1, Mikhail Tatmyshevskiy2, Valentin Semkin2, Alexander Syuy**1, Arslan Mazitov1, Anton Minnekhanov1,Ivan Kazantsev1, Dmitriy Dyubo2, Amir Eghbali2, Dmitry Yakubovsky2, Mikhail Kashchenko2, Mikhail Podobrii2, Elena Titova2, Alexander Melentev2, Elena Zhukova2, Gleb Tselikov1, Ivan Kruglov1, Dmitry Svintsov2, Sergey Novikov2, Andrey Vyshnevyy1, Aleksey Arsenin1, Kostya Novoselov3,4,5* and Valentyn Volkov1**

*1Emerging Technologies Research Center, XPANCEO, Internet City, Emmay Tower, Dubai, United Arab Emirates*

*2Moscow Center for Advanced Studies, Kulakova str. 20, Moscow, 123592, Russia*

*3National Graphene Institute (NGI), University of Manchester, Manchester, M13 9PL, UK*

*4Department of Materials Science and Engineering, National University of Singapore, Singapore, 03-09 EA, Singapore*

*5Institute for Functional Intelligent Materials, National University of Singapore, 117544, Singapore, Singapore*

†These authors contributed equally to this work

**Table of Contents**

**Supplementary Note 1: PdSe2 crystal characterization**

**Supplementary Note 2: PdSe2 angle-resolved Raman spectroscopy**

**Supplementary Note 3: PdSe2 principal optical axes determination**

**Supplementary Note 4: PdSe2 optical constants**

**Supplementary Note 5: Bandstructure of PdSe2**

**Supplementary Note 6: PdSe2-based mid-IR photodetector**

**Supplementary Note 7: Transfer matrix maps calculations**

**Supplementary Note 8: Scanning near-field microscopy**

**Supplementary Note 9: PdSe2 nanoparticles**

**Supplementary Note 10: PdSe2 tabulated optical constants**

**Supplementary Note 11: PdSe2 tabulated BSE ab initio optical constants**

**Supplementary Note 1: PdSe2 crystal characterization**

We observed the atomic structure of PdSe2 thin flakes using transmission electron microscopy (TEM) technique in high-resolution imaging mode (Figure S1a). Despite the crystalline plane image being noisy we clearly see an atomic line pattern. The lines parallelism and straightness prove the absence of structural defects. Moreover, to ensure that the resulting image of the atomic layers corresponds to the pentagonal crystal lattice of PdSe2 we processed high-resolution data using fast Fourier transform (FFT), see Figure S1b. Obtained pattern fits previous data from better quality high-resolution TEM images1.


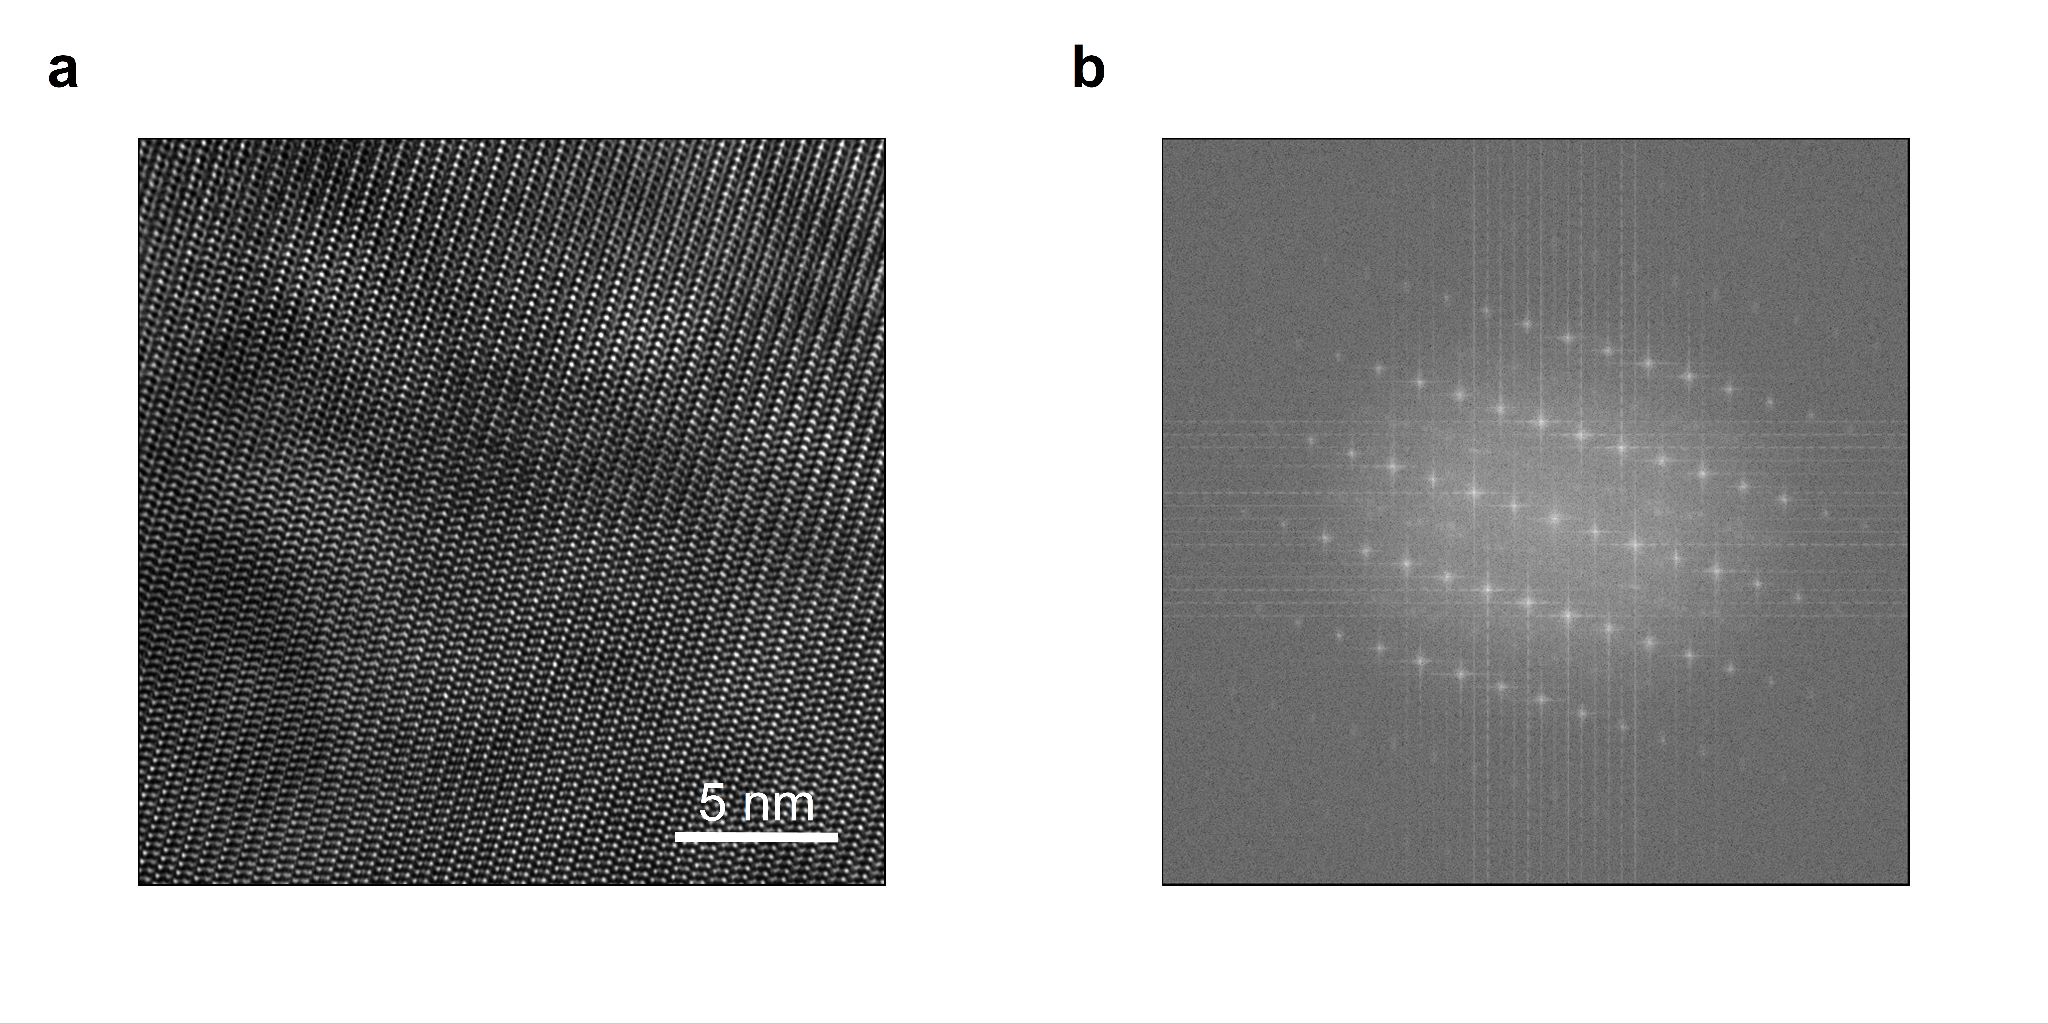


**Figure S1.** (a) High-resolution TEM image of a few-layer PdSe2 flake. (b) Corresponding FFT image.

Selected area electron diffraction (SAED) pattern analysis, along with TEM imaging, provides additional confirmation of phase structure and crystal quality. In this regard, we performed transmission electron microscopy measurement. The experimental SAED pattern (Figure S2a) sufficiently matches with literature experimental data1,2. Also, we simulated a diffraction pattern (Figure S2b) using cif-file that we then used in our ab initio computations. Finally, we overlaid the simulated points onto the experimental image, see Figure S2c. The accuracy of the reflections' coincidence proves the high reliability of the data in the file we use.


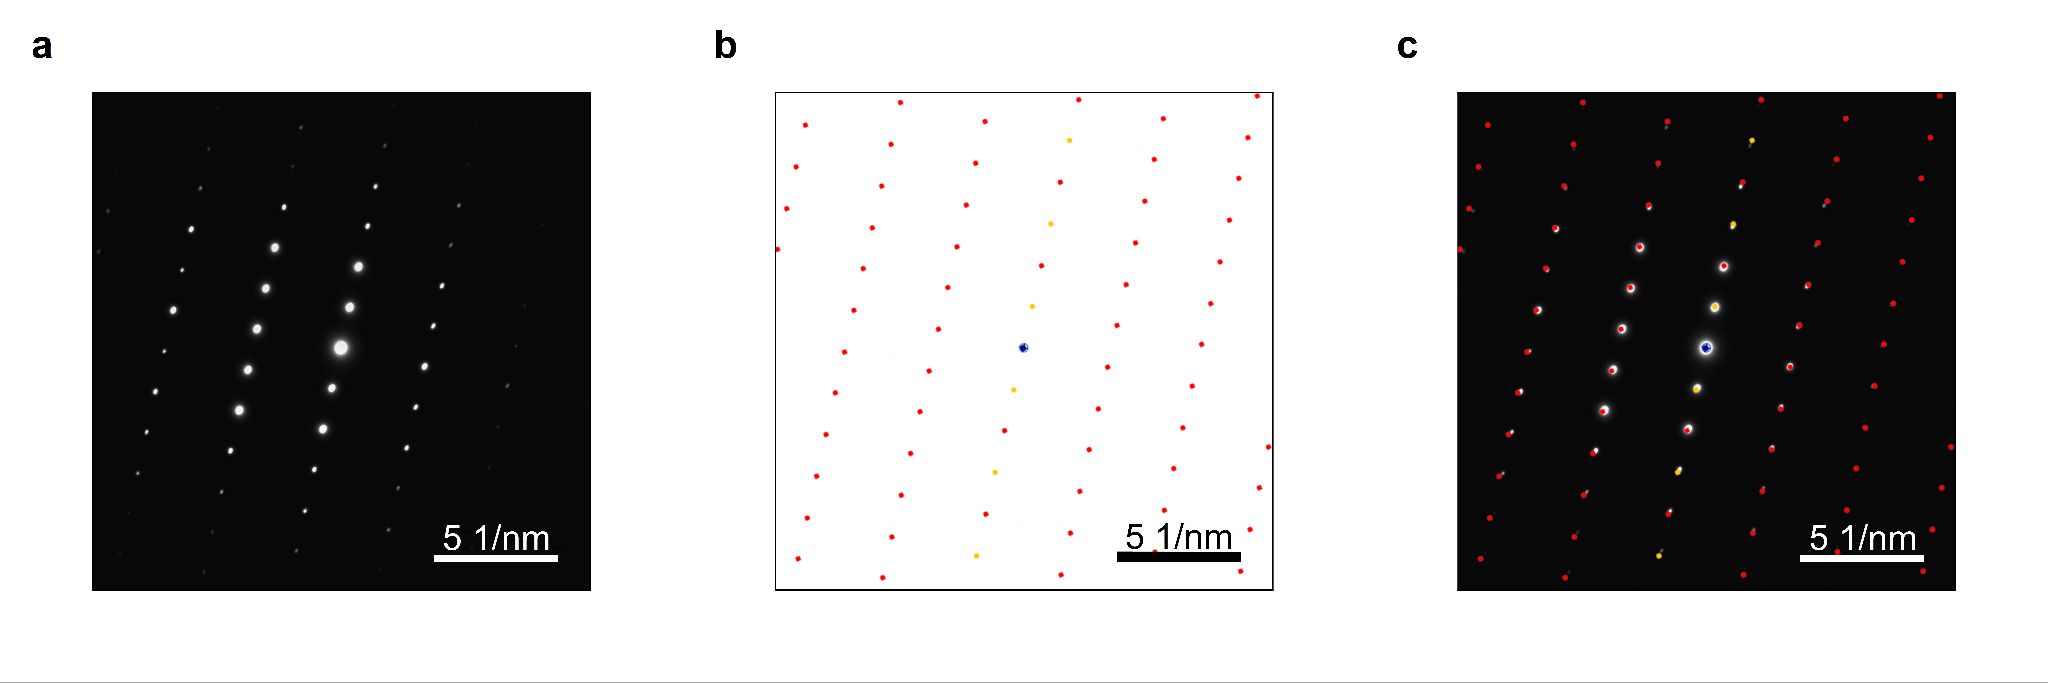


**Figure S2.** (a) Electron diffraction image. (b) Simulated SAED pattern. (c) Overlaying of simulated and experimental data.

**Supplementary Note 2: PdSe2 angle-resolved Raman spectroscopy**

**Crystallographic directions in PdSe2 flakes**

Polarized Raman spectroscopy is a powerful tool for studying crystallographic orientations and defects in vdW materials. In order to identify in-plane crystallographic axes of PdSe2 flakes we utilized polarized Raman spectroscopy in combination with density functional theory (DFT) Raman calculations. All of the Raman spectra of PdSe2 were measured using a Horiba LabRAM HR Evolution (HORIBA Ltd., Kyoto, Japan) confocal Raman microscope, equipped with a 100× objective (N.A. = 0.9) and a 1800 lines/mm diffraction grating. A 532 nm laser was used as a source of linearly polarized light, along with an additional analyzer placed in the way of the scattered beam, which allowed us to measure Raman spectra in parallel configuration. Raman spectra were acquired with laser power of 0.35 mW and a spot size of ~1 µm. The samples were rotated in a full circle with 30° step, and the spectra at all sample rotation angles were accumulated over 10 different points on the flake over 10 s integration time. After the measurements, all spectra were processed by subtracting baseline and fitting Raman peaks with Lorentz function.


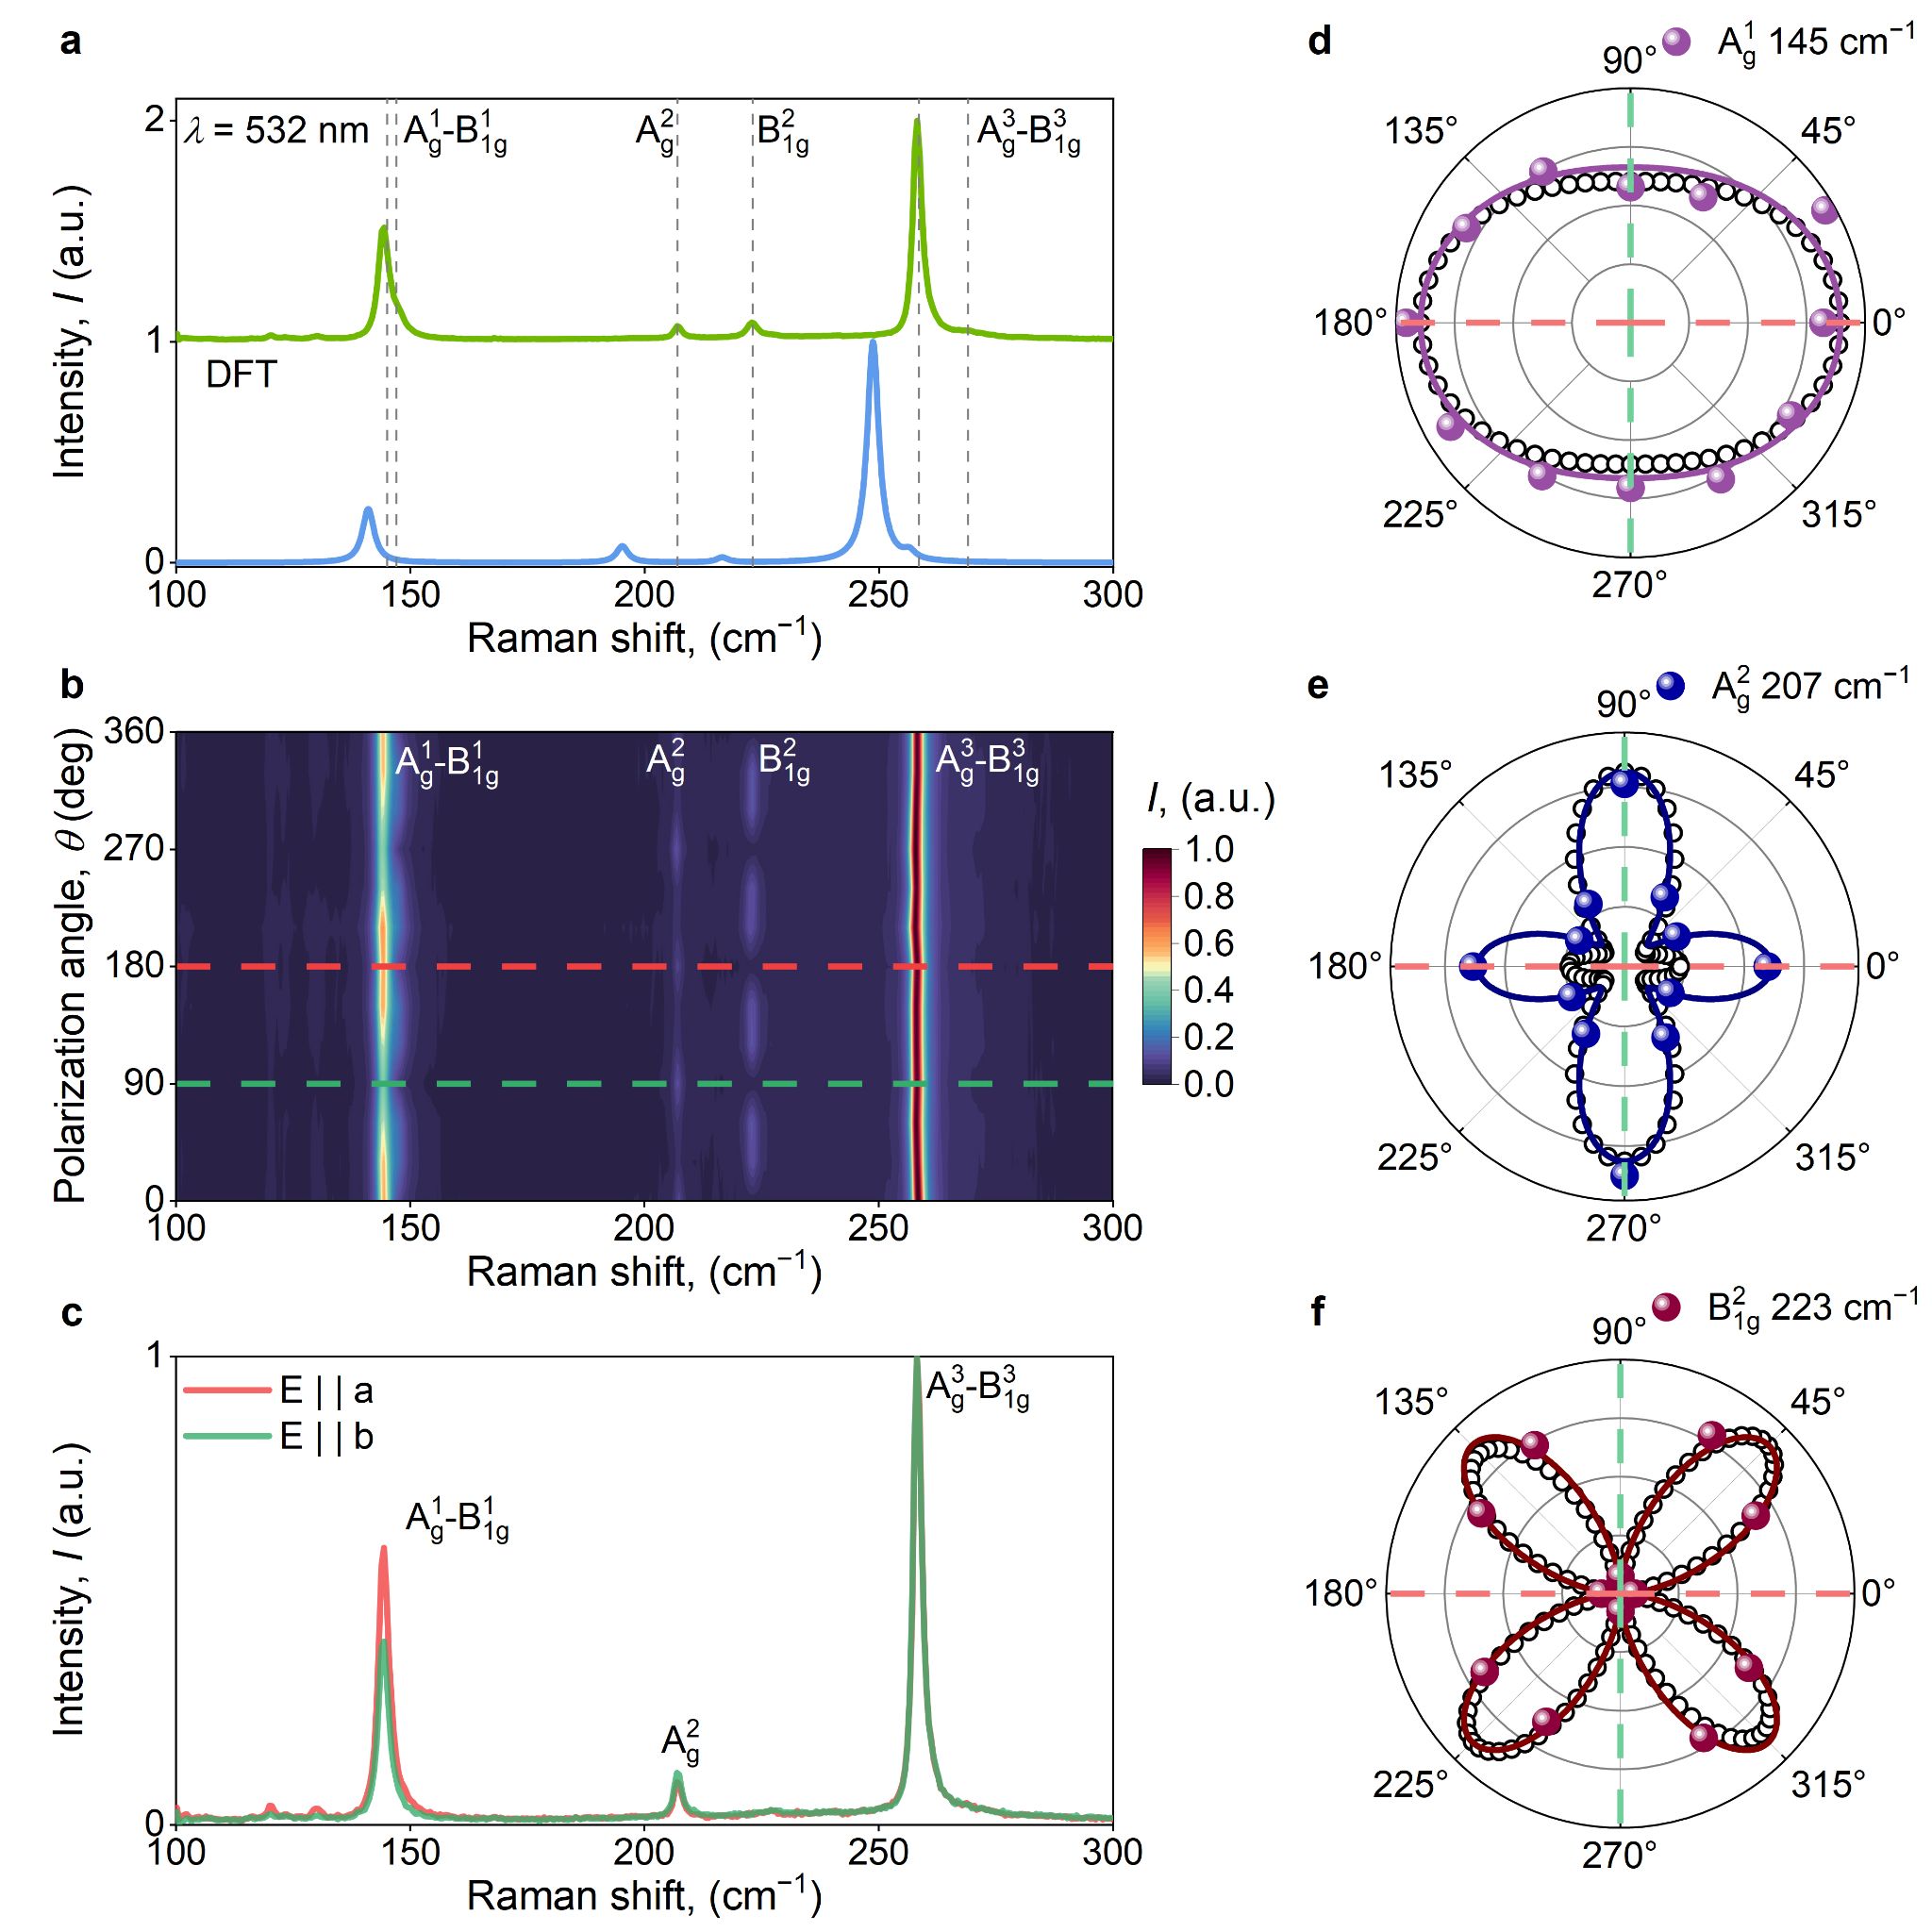


**Figure S3.** (a)Experimental angle-averaged Raman spectra of PdSe2 flake (green line, *λ* = 532 nm) and DFT calculations (blue line). (b)angle-resolved Raman spectrum map. Dashed red and green lines denote orientations of a and b axes, correspondingly. (c) Raman spectra of the bulk PdSe2 flake with laser polarized along a and b crystallographic axes. (d-f)polar diagrams of Raman resonance peaks. Colored points denote experimental data, solid lines represent fitted curves and blank circles depict DFT calculated diagrams. The data in polar diagrams are normalized to their maximum values, respectively.

Figure S3a represents in-plane angle-averaged experimental and calculated Raman spectra. We identified six Raman-active vibrational modes between 100 and 300 cm−1: three symmetric Ag modes and three antisymmetric B₁g modes. Experimental Raman active modes are marked with dashed gray lines. These findings are in complete agreement with our calculations and previous reports3–5. Further details on vibration response analysis are presented in the next subsection.

The intensities of Raman modes are sensitive to the polarization angle of the incident light. Since the orientation of in-plane crystallographic axes is fixed relative to the Raman mode patterns in polar diagrams, we utilized this property to determine the crystal axes of the PdSe₂ flakes. Figure S3b shows a polarization-dependent Raman intensity map. By applying Raman tensor calculations, we matched polarization dependencies of each experimental mode to theoretical predictions with known directions of the in-plane crystal axes (see Figure S4). Thus, we determined the *a* and *b* axes of crystallographic directions. Figure S3c represents Raman spectra for incident laser-beam polarization along the crystalline axes. Most of the experimental peaks showed remarkable congruence with the vibrational modes calculated via DFT, as depicted in the polar diagrams for Ag1 (145 cm−1), Ag2 (207 cm−1), B1g2 (223 cm−1) mode (see Figure S3d-f). The red and green dashed lines represent the laser-beam polarization directions parallel to the crystallographic *a* and *b* axes, respectively. We observe additional peaks coming from second-order Raman scattering since the laser energy exceeds PdSe2 optical bandgap, which we prove by calculating the two-phonon density of states, see below.


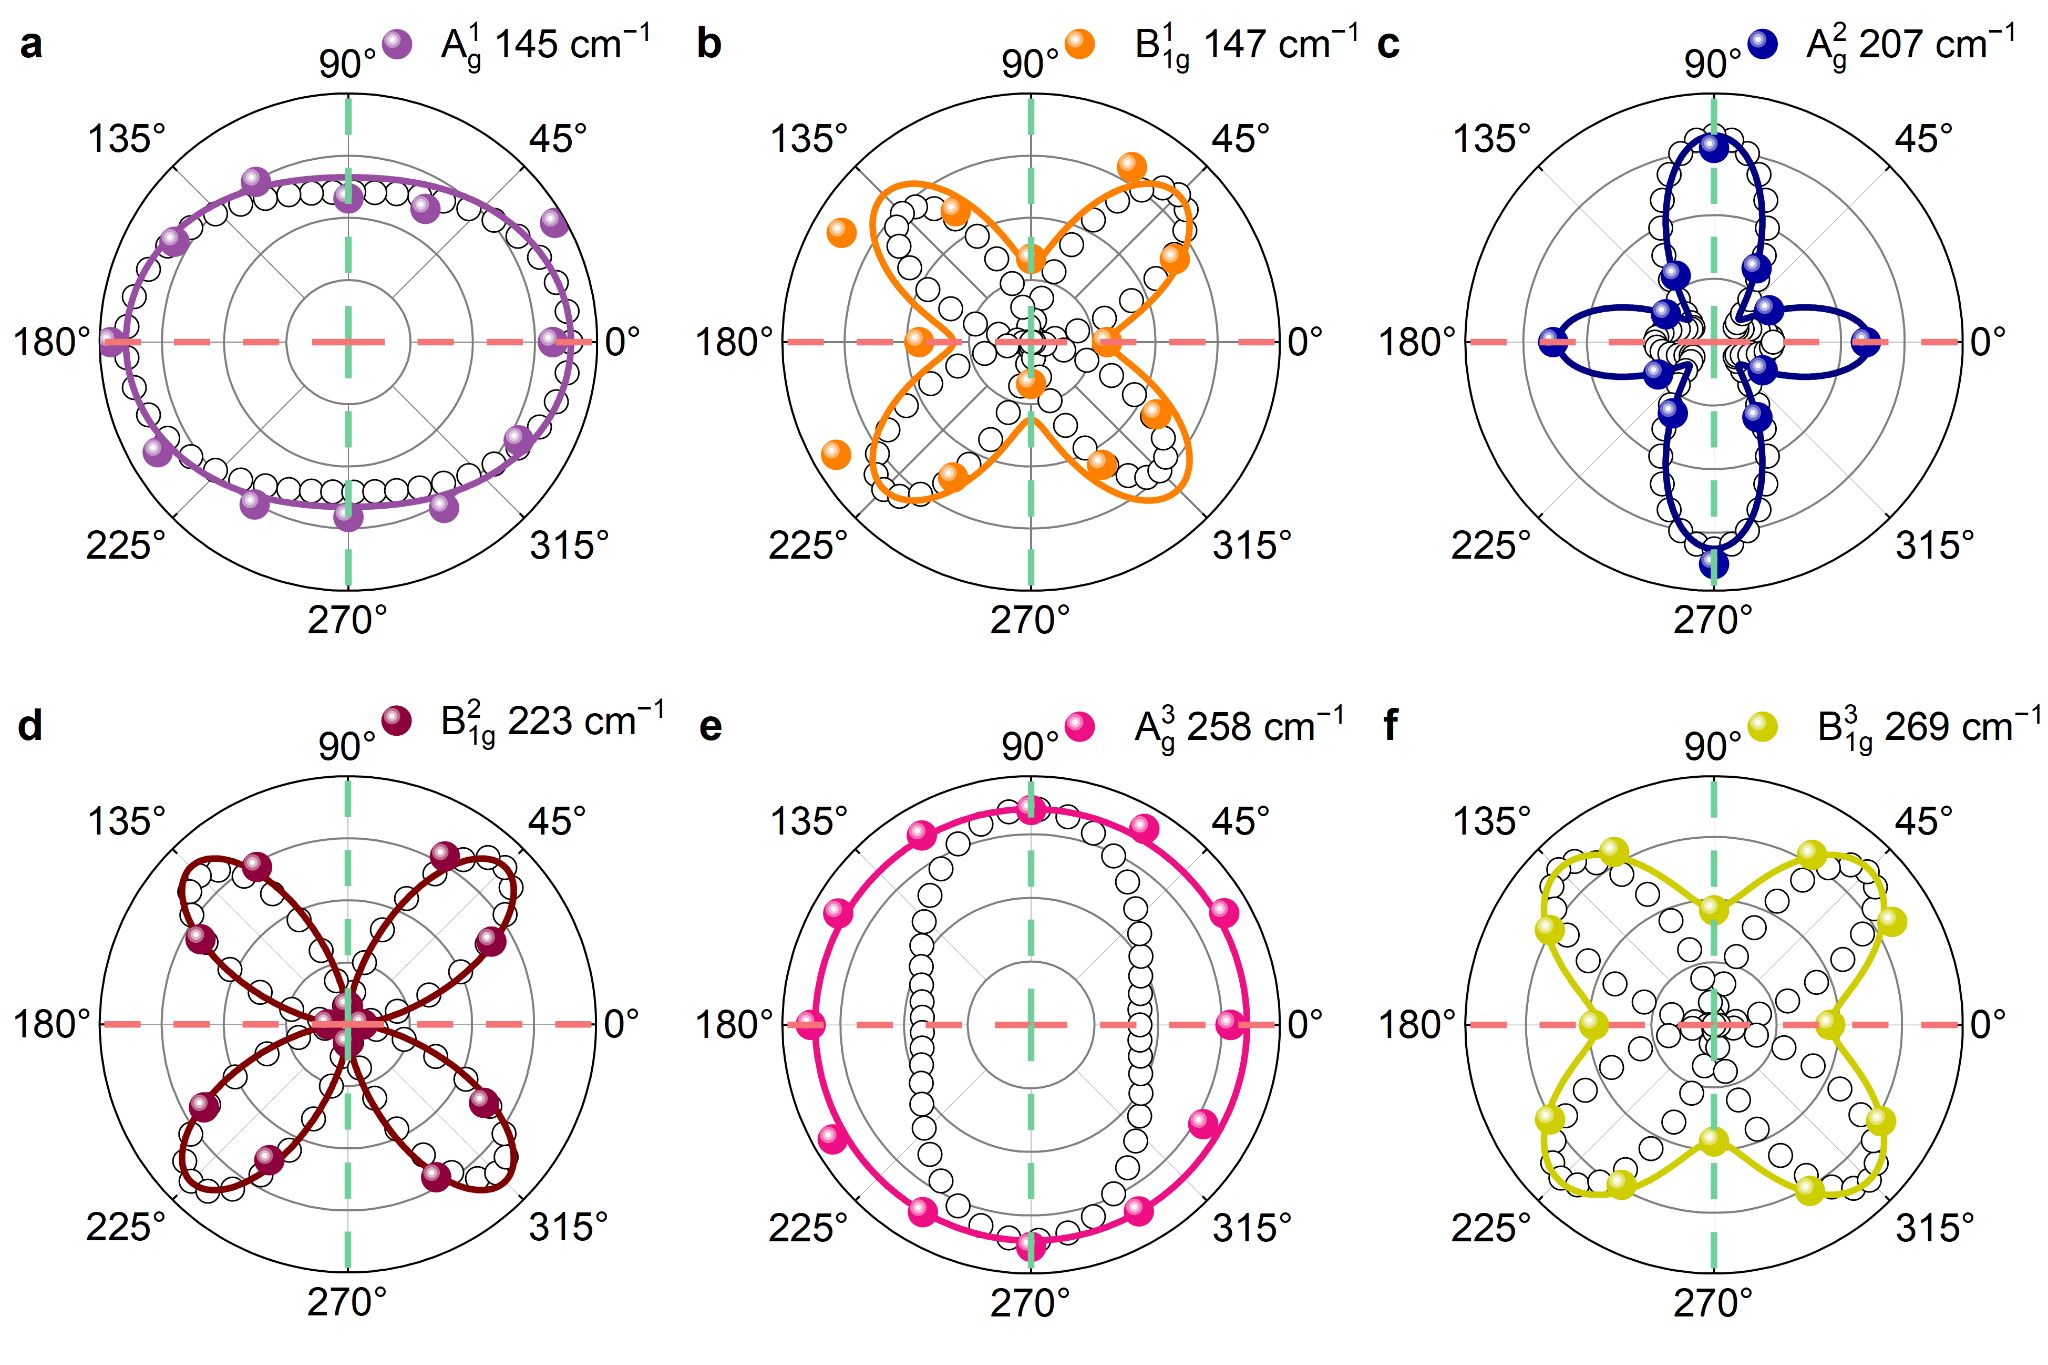


**Figure S4.** (a-f) Polar diagrams of Raman peaks with their experimental positions. Color dots represent experimental data, solid lines are fitted curves and blank circles denote theoretical dependencies.

**PdSe2 vibrational response analysis**

Ab-initio calculations were performed using Vienna ab initio simulation package (VASP) code6. The core electrons are described with projector augmented wave (PAW) pseudopotentials treating the Pd 4d, 5s and the Se 4s and 4p electrons as valence. A kinetic energy cutoff for the plane-wave basis was set to 400 eV. The lattice parameters of PdSe2 crystal were taken from the literature7. Raman spectra and polar diagrams were computed based on the Phonopy-Spectroscopy package with our modifications.

PdSe2 belongs to the orthorhombic system and has the space group Pbca. Representation for the lattice modes is as follows:

In total we have 36 phonon modes which is 3⨉12 (12 atoms per unit cell). Vibrations having Ag, B1g, B2g and B3g irreducible representations are Raman-active. In the experimental geometry used in our measurements (laser beam is parallel to c-axis and light polarization is in-plane) we observe only 3Ag and 3B1g modes (6 in total).


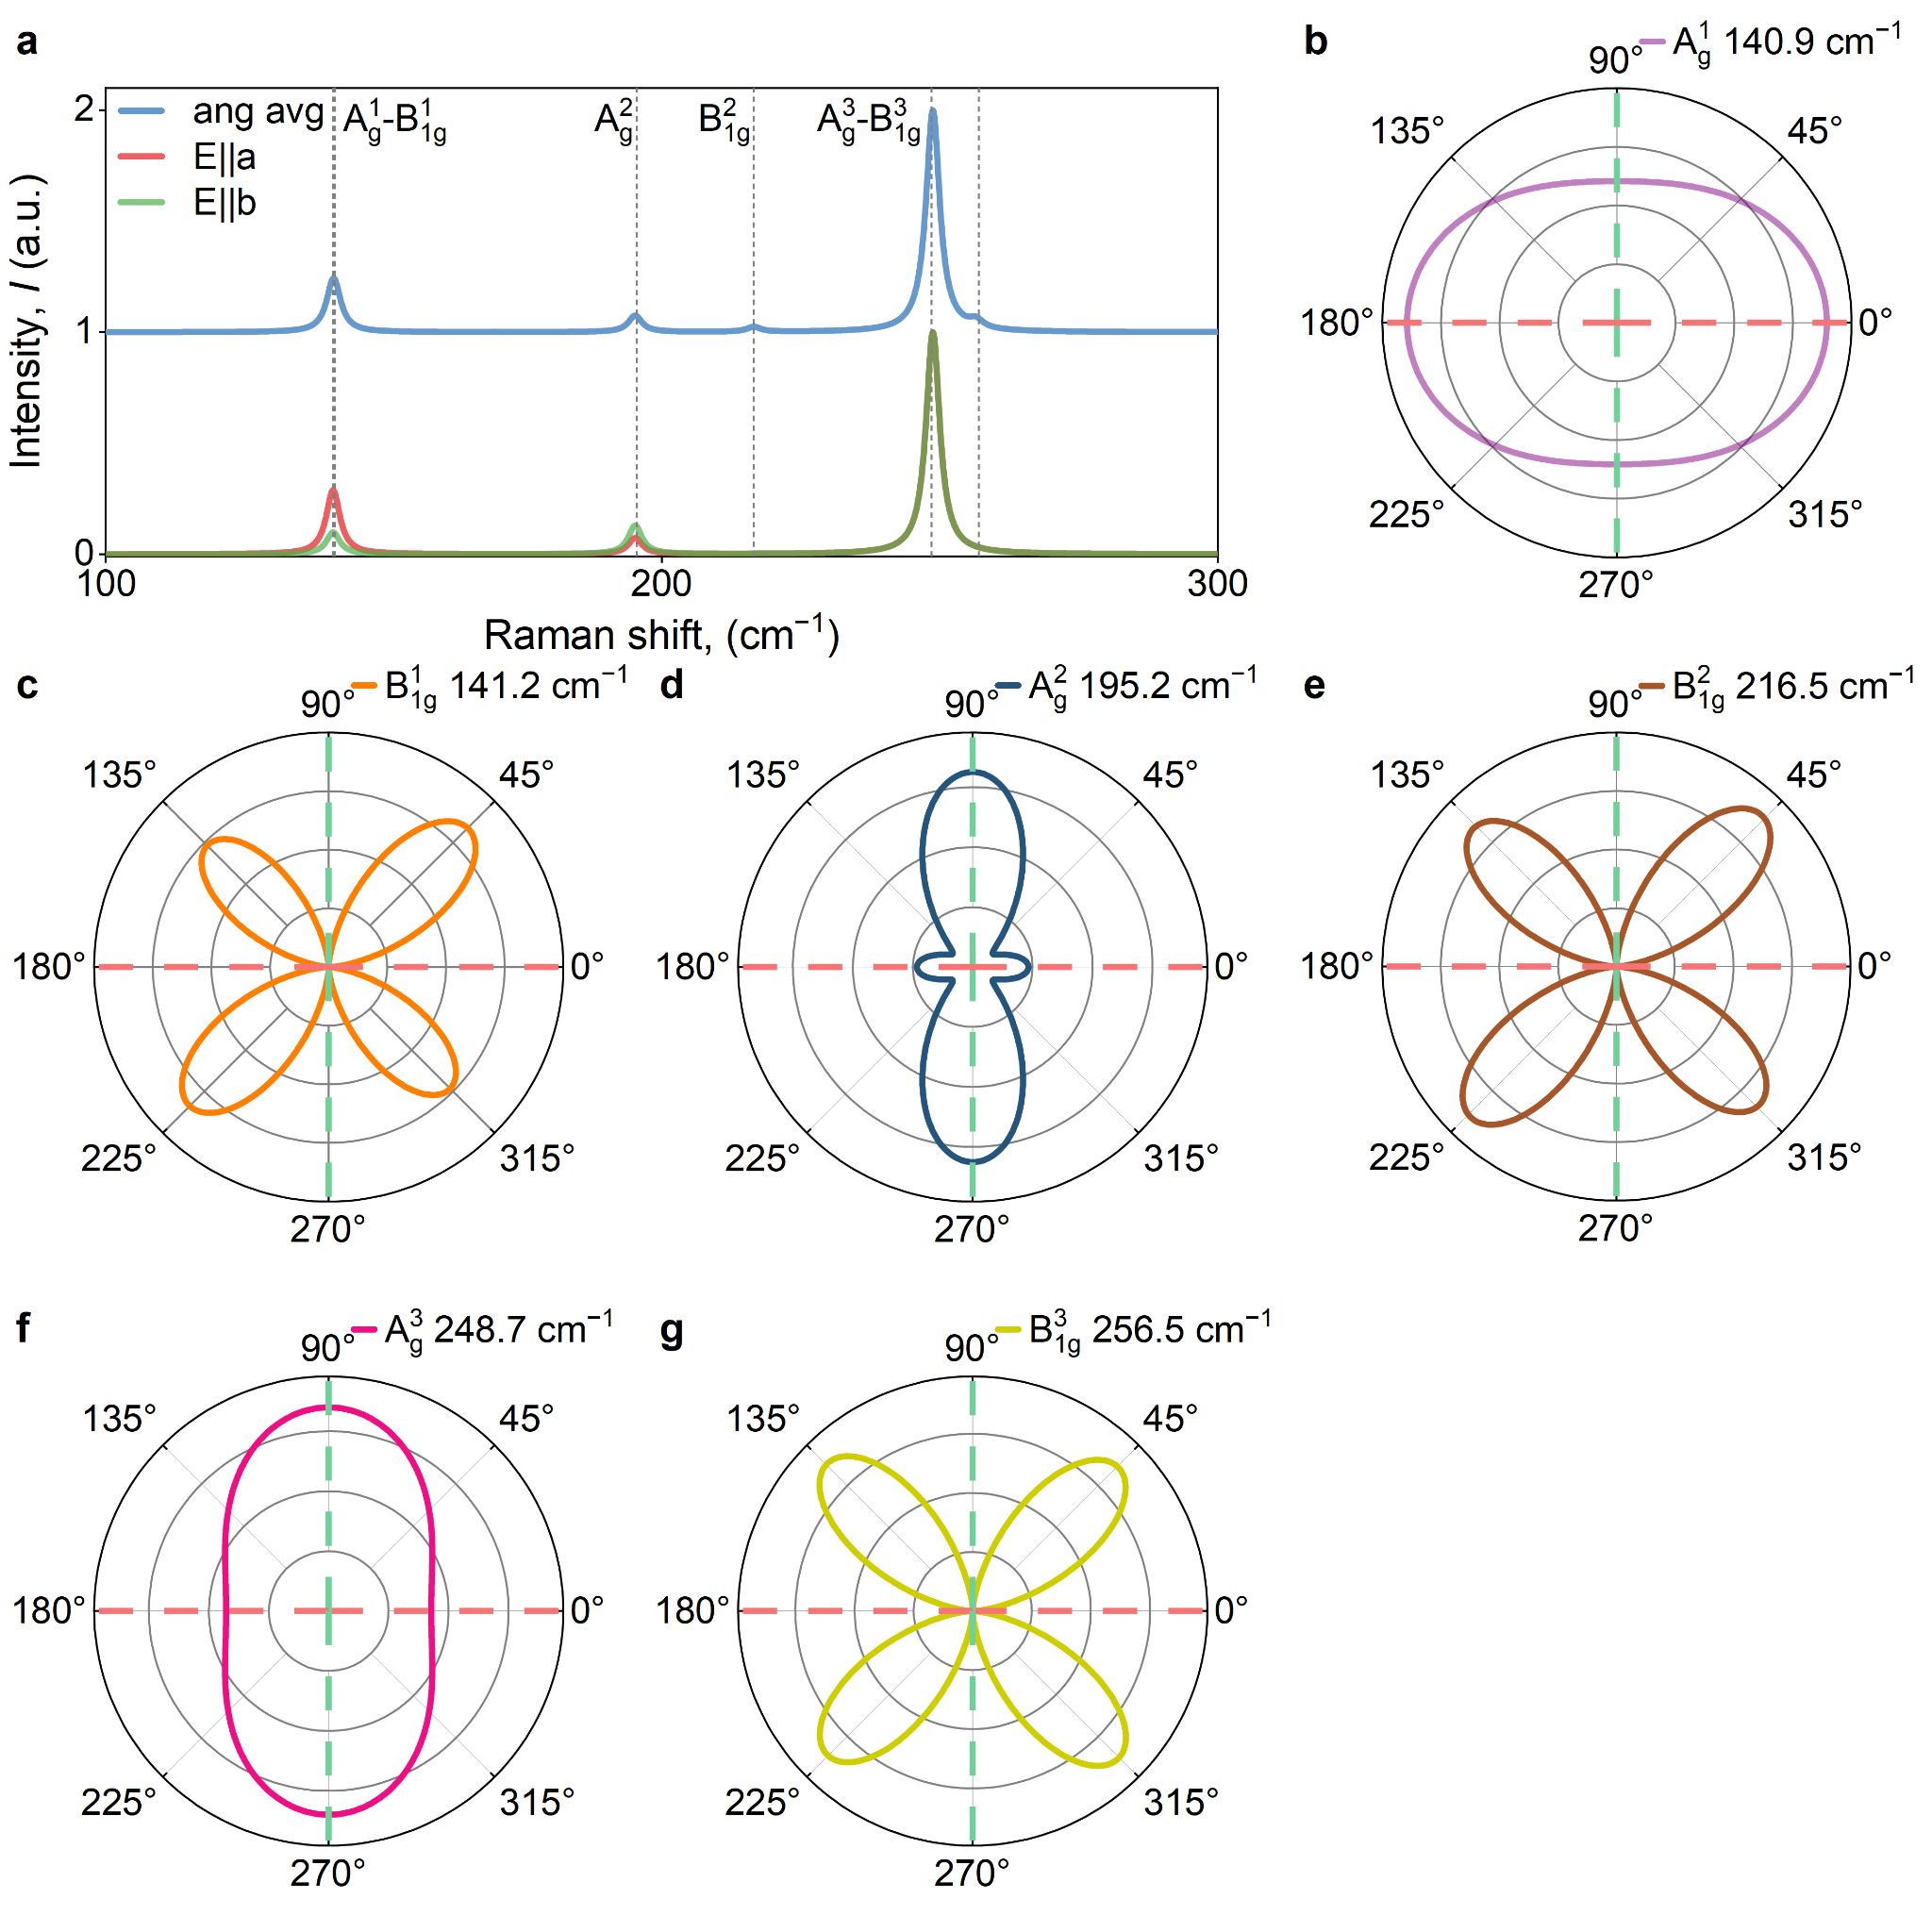


**Figure S5.** (a) Theoretical Raman spectra with light polarized along crystallographic axes. (b-g) Polar diagrams of theoretical Raman active peaks with their computed positions.

Applying Phonopy code8,9, we calculated Raman tensors based on frequency-dependent dielectric tensors (within the independent particle approach) for all phonon modes above 100 cm−1. Experimental and theoretical angle-averaged Raman spectra in Figure S3a and along crystallographic axes (see Figure S3c and Figure S5a) are in good agreement. The experimental positions of 6 Raman-active modes in the range from 100 to 300 cm−1 are: 145, 147, 207, 223, 258 and 269 cm−1. Corresponding computed positions are: 140.9 (Ag), 141.2 (B1g), 195.2(Ag), 216.5 (B1g), 248.7 (Ag) and 256.5 (B1g) cm−1. In Figure S5b-g angle-resolved Raman intensities for calculated Raman-active vibrations are shown. Their geometrical origin is demonstrated in Figure 4c of the previous research10.

Notably, we observed additional experimental peaks associated with the second-order processes since the laser energy of 2.33 eV exceeds the electronic bandgap of the material. We confirm this fact by constructing an overtone density of states (DOS), that is phonon DOS on its 2-fold range (see Figure S6). It is seen that additional lines on the Raman spectrum are in good agreement with the overtone DOS which justifies their resonant (second-order) nature. We also observe a new peak beyond the range from 100 to 300 cm−1.


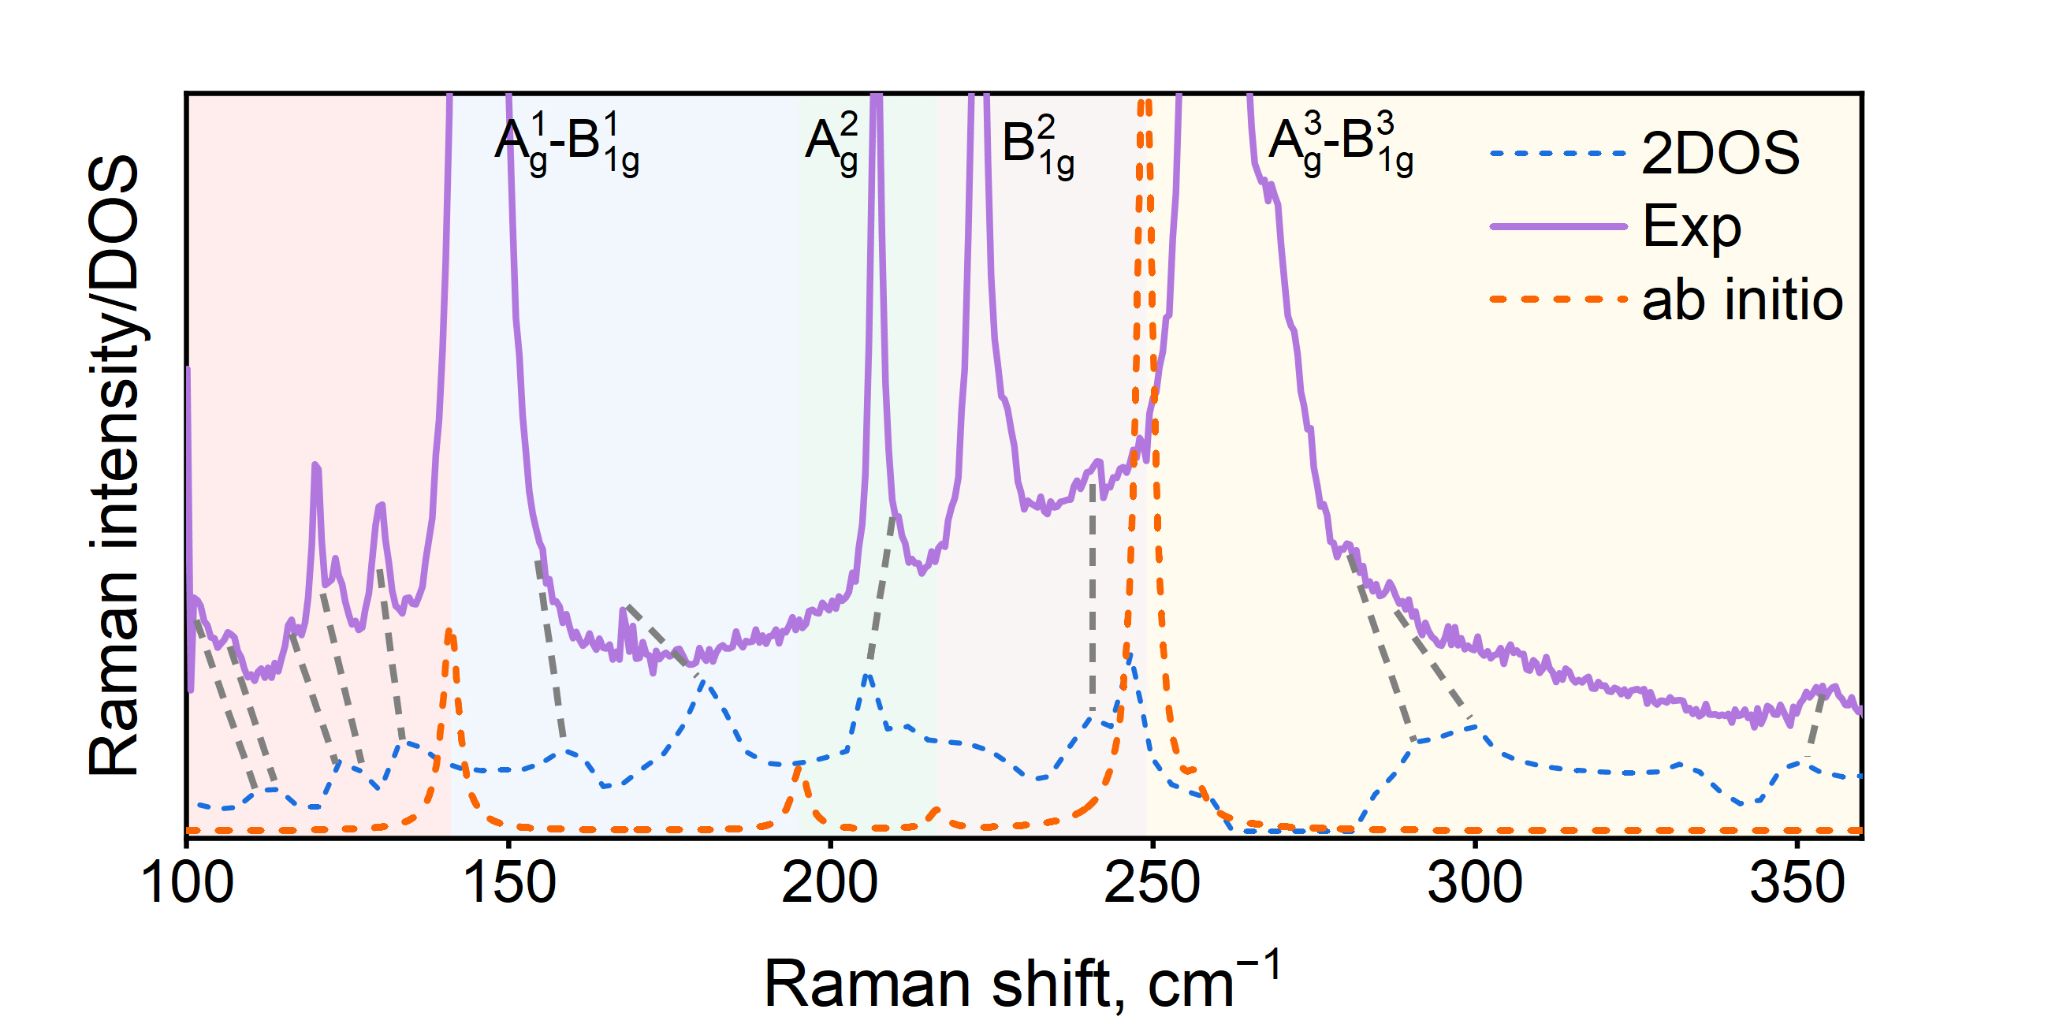


**Figure S6.** Experimental (purple solid line) and DFT (orange dashed line) Raman spectra for angle-averaged in-plane parallel polarizations. Density of overtone phonon states (blue dashed line). Gray dashed lines connect the experimental peaks to the DFT overtones. We chose these spectra scales for clarity.

**Supplementary Note 3: PdSe2 principal optical axes determination**

The comparison of dielectric tensor principal axes and crystallographic axes is an important step in the investigation of optical properties. For the attribution of *n*a and *n*b to the main crystallographic axes, we determined the in-plane crystallographic directions of PdSe2 flakes via polarization-resolved Raman spectroscopy method as described in the previous section. To find the principal optical axes, we performed polarized micro-reflectance measurements (see Methods). Figure S7a shows the experimental polarization-dependent reflectance map measured with 10° steps in a visible range (500–800 nm) from 0° to 360°. The extracted spectra were approximated linearly with a Δ*λ* of 1 nm. Subsequently, each at fixed was fitted (see Figure S7b) with the following formula:

where *Rλ*(*α*) is a reflectance at a given wavelength *λ*.

where is the polarization angle, *φ*0 is the angle identifying the principal optical axis position. The angle for the second principal axis is *φ*0 + 90**°**. and are the reflectance spectra with light polarized along in-plane optical axes and is the phase difference between reflected beams polarized along a- and b-axes, correspondingly. Next, to determine optical axes, we used fitted curves (Figure S7c). Then, we matched principal optical and crystallographic axes directions to designate *n*a and *n*b refractive-index-tensor components.


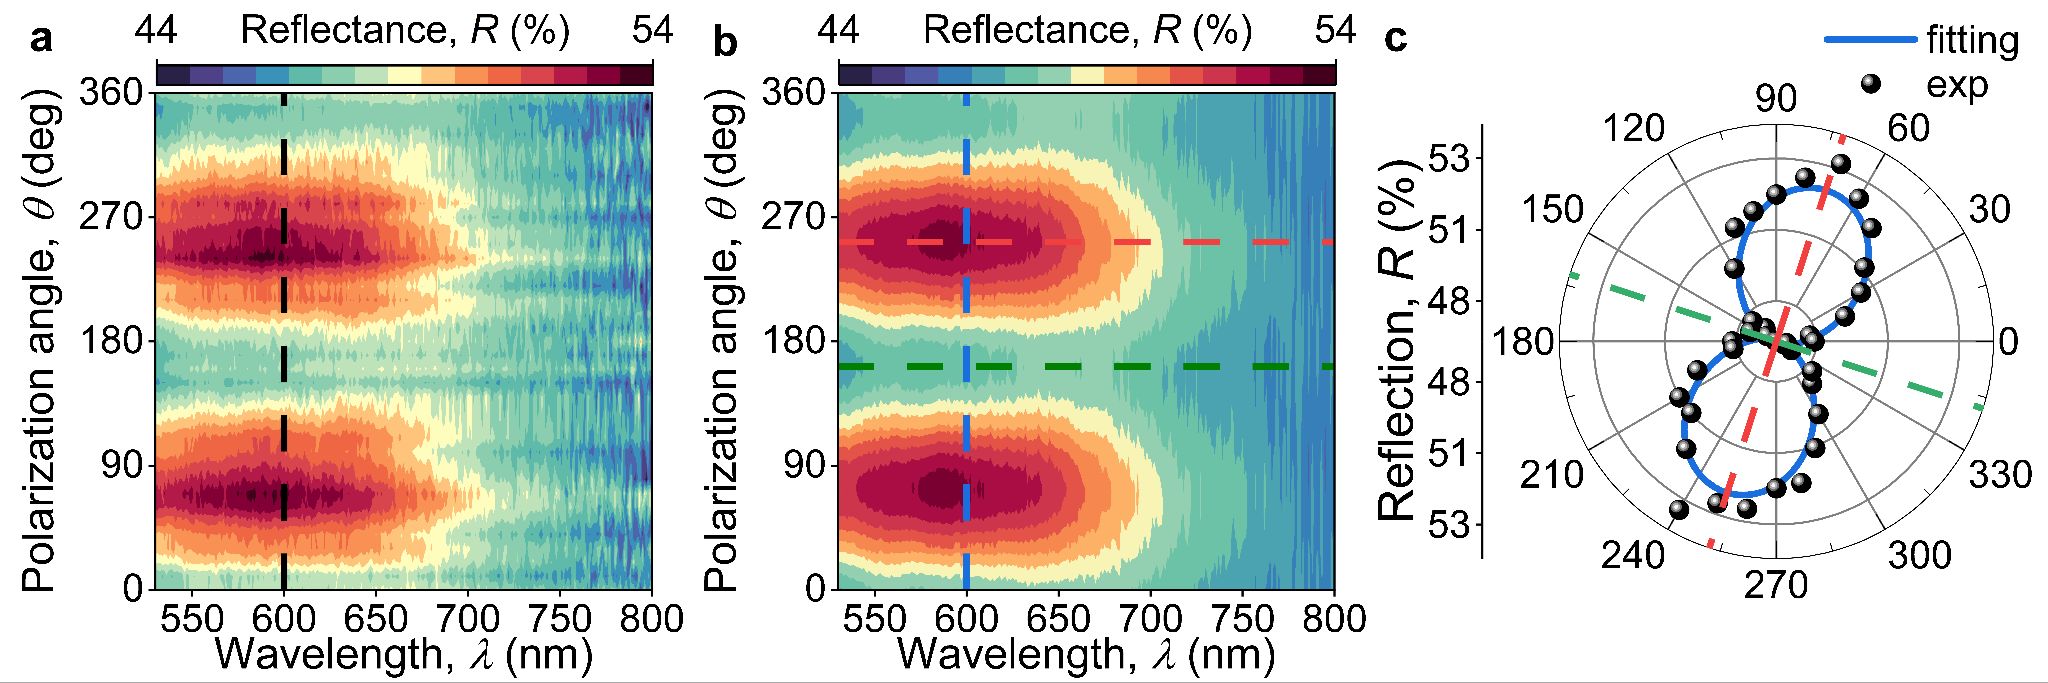


**Figure S7.** (a,b) Polarized micro-reflectance experimental and fitting maps of PdSe2 flake respectively. (c) Angle-dependent reflectance diagram is taken along vertical dashed lines in the panels (a,b). The green and red dashed lines denote the optical axes (b,c).

**Supplementary Note 4: PdSe2 optical constants**

**PdSe2 optical constants determination from reflectance and ellipsometry measurements**

To obtain the refractive index complex tensor we performed spectroscopic ellipsometry (250-1700 nm) of PdSe2 flakes on Si substrates. We also obtained the reflectance spectra in the wavelength region from VIS to FIR by combining and from angle-resolved measurements (see Supplementary Note 3) and reflectance spectra with polarization of incident light along in-plane principal optical axes from Fourier-transform infrared spectroscopy measurements, as demonstrated in Figure S8. Then we acquire the full dielectric tensor of PdSe2 by fitting of *Ψ*, *Δ* spectra at different angles (see example in Figure S9) and the resulted reflectance spectra (see example in Figure S8c) simultaneously. We used Tauc-Lorentz oscillators model to describe excitonic response11 and Drude oscillator model to take into account metallic response in infrared wavelength range for in-plane light polarization:

where *x* represent *a*, *b* with respect to crystal in-plane anisotropy, *ε*∞ is a contribution in the dielectric function of high energy interband transition, *E* is photon energy, *ε0* is vacuum permittivity, *A*Drude and *B* amplitude and damping coefficient of Drude oscillator*, n* is a number of Tauc-Lorentz oscillators, *E*g is optical band gap, *HE*g is Heaviside step function equal one if *E* > *E*g,x and zero otherwise, *A*j, *C*j, and *E*0,j are strength, broadening term, and peak central energy of *j*th Tauc-Lorentz oscillator, respectively. The out-of-plane component of permittivity tensor does not have Drude tail because electron jumps between layers along *c*-axis are neglectable. Therefore, the fitting formula has a different form:

where *A*pole and *E*pole are magnitude and pole position respectively. For the initial approximation we used PdSe2 CVD filmoptical constants12, see Figure S10. The calculated reflectance spectra based on the obtained optical constants are in good agreement with experimental data, as shown in Figure S8. Final parameters of the optical model are collected in Table S1, Table S2, Table S3 for *a*, *b* and *c* principal optical axes respectively. Tabulated optical constants are represented in Supplementary Note 10.


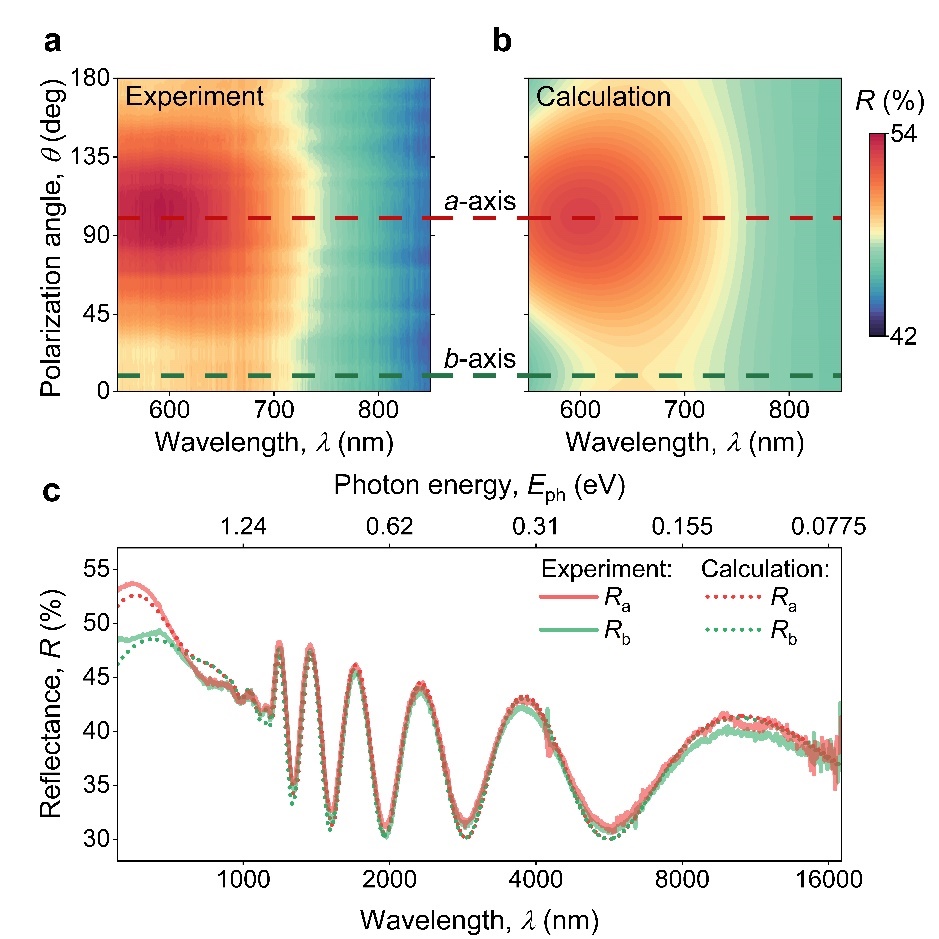


**Figure S8.** (a,b) Experimental and calculated polarization-resolved micro-reflectance maps of 717-nm-thick PdSe2 flake respectively. Red and green dashed lines illustrate *a* and *b* axes. (c) Experimental reflectance spectra with light polarized along *a* and *b* axes are presented by solid lines. Calculated spectra are drawn with dotted lines.


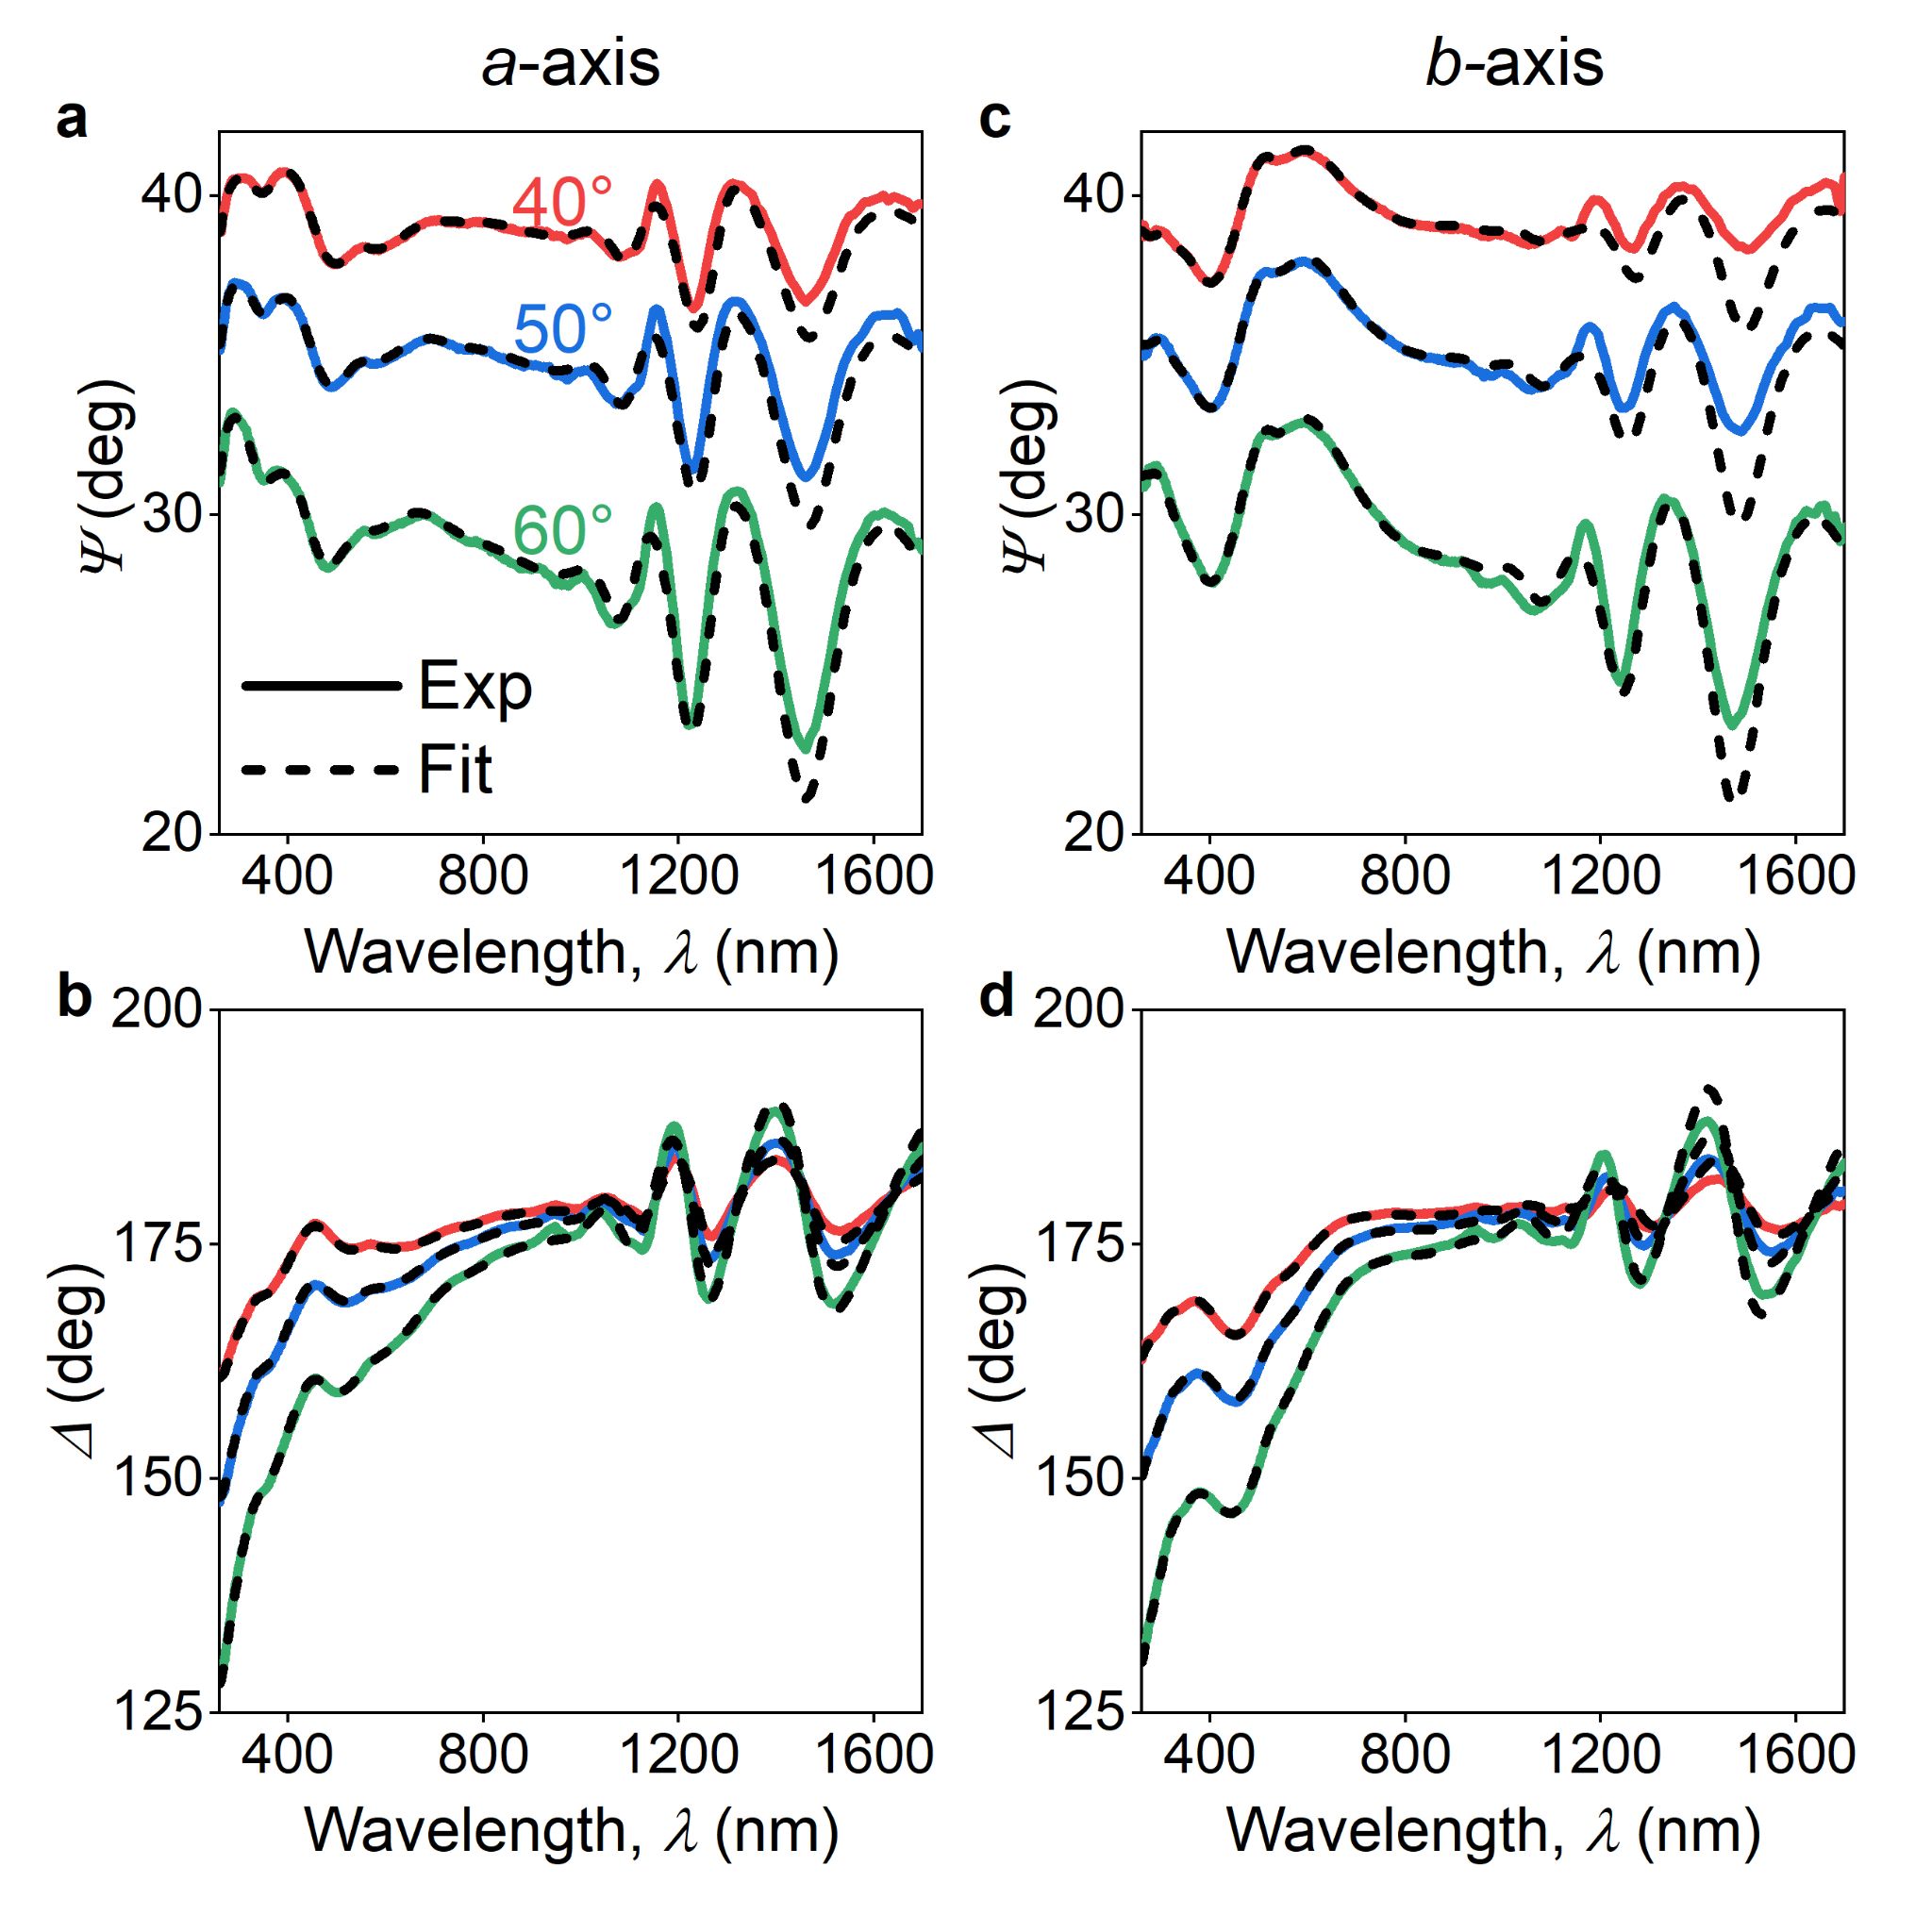


**Figure S9.** (a,b) *Ψ* and *Δ* of 717 nm thick PdSe2 flake with light polarized along *a-*axis. (c,d) *Ψ* and *Δ* of 717 nm thick PdSe2 flake with light polarized along *b-*axis. Dashed lines denote fitting curves, solid lines represent experimental data.


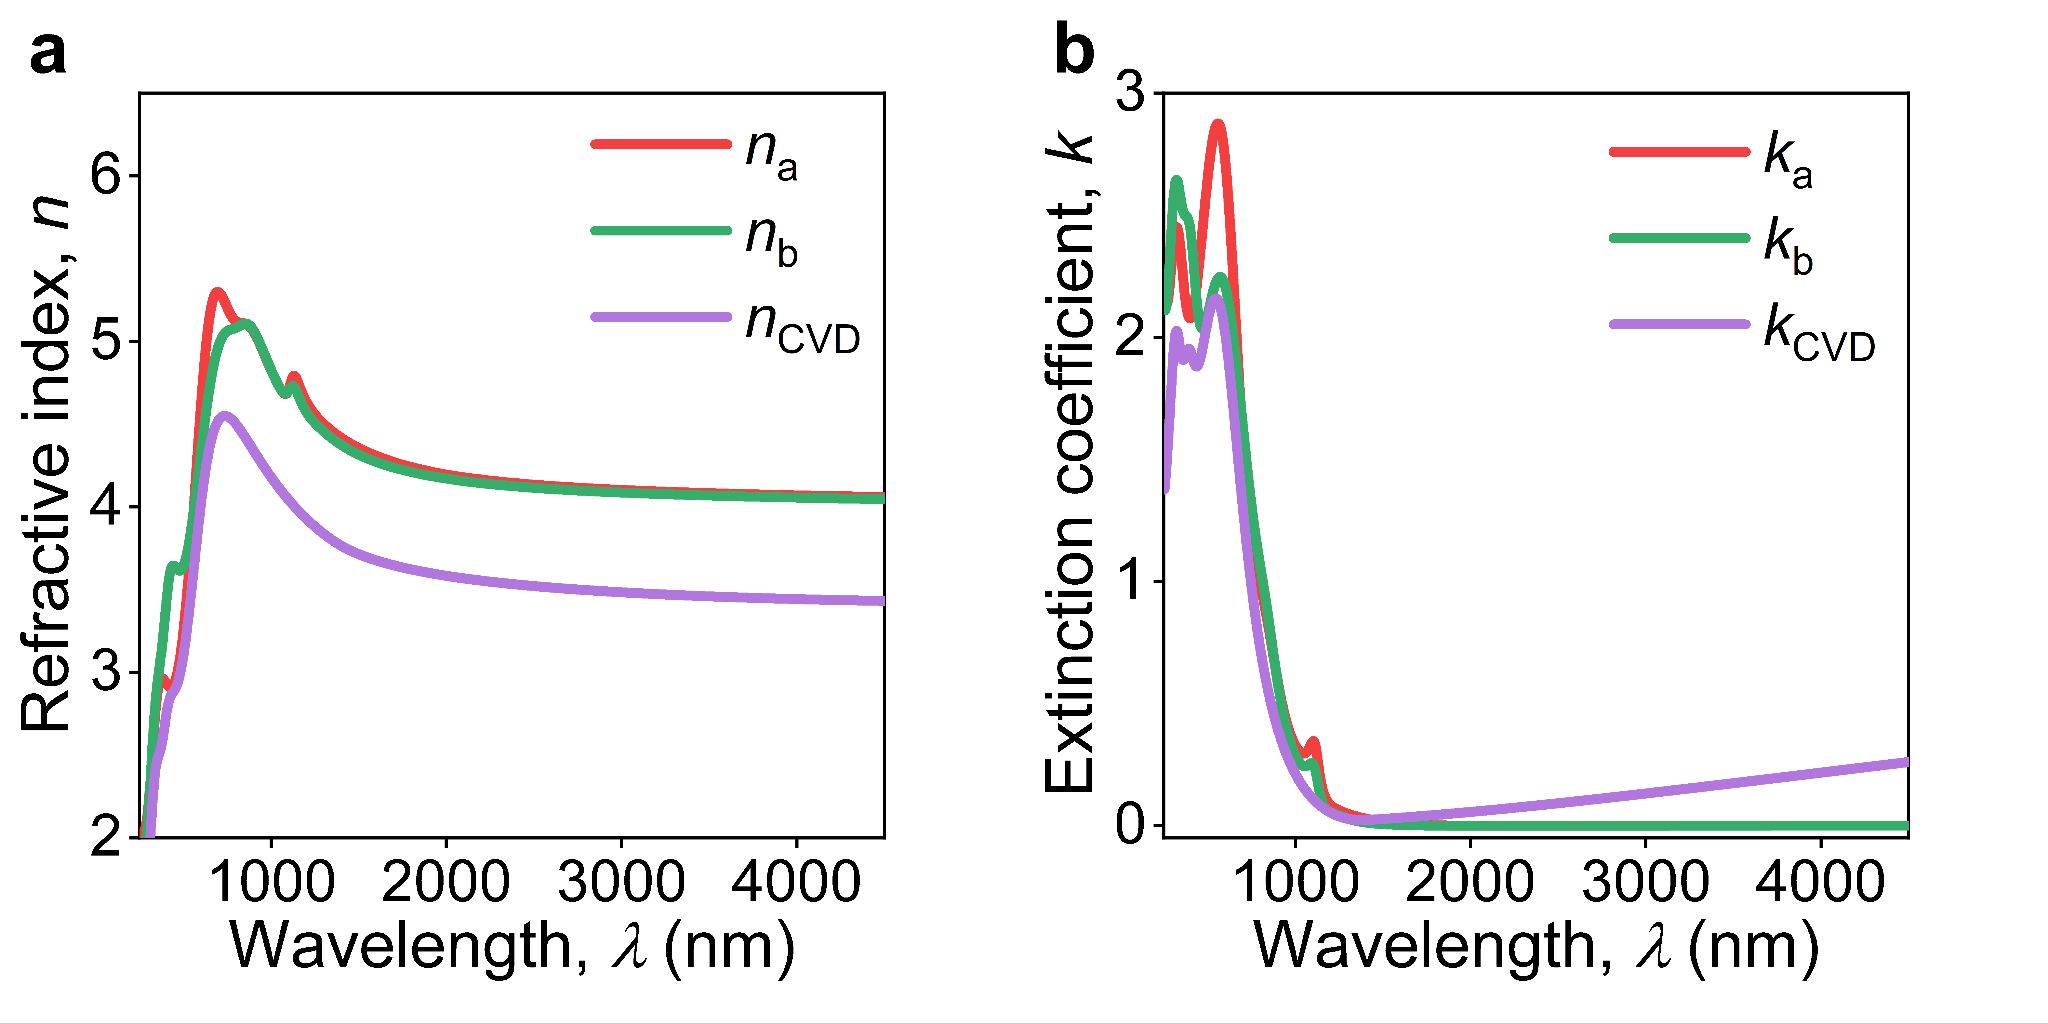


**Figure S10.** (a,b) Comparison of in-plane PdSe2 refractive index and extinction coefficient of bulk and CVD firm.

**Table S1.** Tauc-Lorentz oscillators model parameters of *a* axis ( *ε*∞ = 2.871; *A*Drude = 0.68598 eV; *B* = 0.2 eV).

| Tauc-Lorentz oscillators | *A*, eV | *E*0, eV | *C*, eV | *E*g, eV |
| --- | --- | --- | --- | --- |
|  |  |  |  |  |
| 1a | 0.4841 | 1.022 | 0.194 | 0.679 |
| 2a | 16.178 | 1.11 | 0.0827 | 1.02 |
| 3a | 2.2187 | 1.475 | 0.322 | 0.616 |
| 4a | 93.606 | 1.9 | 1.178 | 1.007 |
| 5a | 29.480 | 3.001 | 0.828 | 1.723 |
| 6a | 14.419 | 3.76 | 1.286 | 0.668 |
| 7a | 10.259 | 5.283 | 1.546 | 0.675 |

**Table S2.** Tauc-Lorentz oscillators model parameters of *b* axis (*ε*∞ = 2.583; *A*Drude = 0.68598 eV; *B* = 0.2 eV).

| Tauc-Lorentz oscillators | *A*, eV | *E*0, eV | *C*, eV | *E*gn, eV |
| --- | --- | --- | --- | --- |
| 1b | 13.614 | 1.109 | 0.073 | 1 |
| 2b | 9.6829 | 1.487 | 0.493 | 0.621 |
| 3b | 156.69 | 1.942 | 0.868 | 1.276 |
| 4b | 25.009 | 3.652 | 1.409 | 1.194 |
| 5b | 11.005 | 5.188 | 1.564 | 0.696 |

**Table S3.** Tauc-Lorentz oscillators model parameters of *c* axis (*A*pole = 395.38 eV2; *E*pole = 7.297 eV).

| Tauc-Lorentz oscillators | *A*, eV | *E*0, eV | *C*, eV | *E*gn, eV |
| --- | --- | --- | --- | --- |
| 1c | 5.783 | 1.529 | 0.649 | 0.466 |

**PdSe2 ab initio optical constants computation**

The optical constants of the PdSe2 crystal were calculated within the DFT, GW approximation, and Bethe-Salpeter equation (BSE), as implemented in VASP package13–16 We first obtained the one-electron ground-state wavefunctions from a single-shot DFT calculation and used them to initialize the GW run. Next, we calculated the imaginary and real parts of the frequency dependent dielectric function within the GW approximation and derived the refractive indices and extinction coefficients of the material. Finally, we used the GW wavefunctions and screened Coulomb interaction components to solve the BSE and account for the excitonic effects. The cutoff energy for the plane wave basis was set to 400 eV, while the first Brillouin zone was sampled with a -centered 7×7×5 grid. The exchange correlation effects were described with a generalized gradient approximation (Perdew-Burke-Ernzerhof functional)17, and the behavior of the wavefunctions in the core region was reconstructed with the projector augmented wave pseudopotentials of a GW type. We used 256 bands in the DFT run to initialize the dielectric function, and performed the GW calculation on a total of 64 lowest-energy bands. In the BSE run, we used 12 occupied and 12 valence bands to describe the excitonic effects. All results are collected in Figure S11 and compared to experimental constants.

We first note that although the pure DFT results can quantitatively reproduce the experimental peak in the refractive index around 700 nm, the long wavelength behavior is mostly inconsistent (see Figure S11a). This effect is often due to the underestimation of the electron correlation effects in the PBE exchange-correlation functional, and therefore one would expect the GW results to be in much better agreement with the experimental data. Nevertheless, both the microscopic and macroscopic dielectric functions obtained from the GW calculation also diverge significantly from the experimental data. Finally, taking into account the excitonic effects by solving the Bethe–Salpeter equation, we were able to reproduce the two excitonic peaks in the refractive index around 700 nm and the long wavelength asymptotics of the dielectric function. Tabulated BSE optical constants are listed in Supplementary note 11.

**
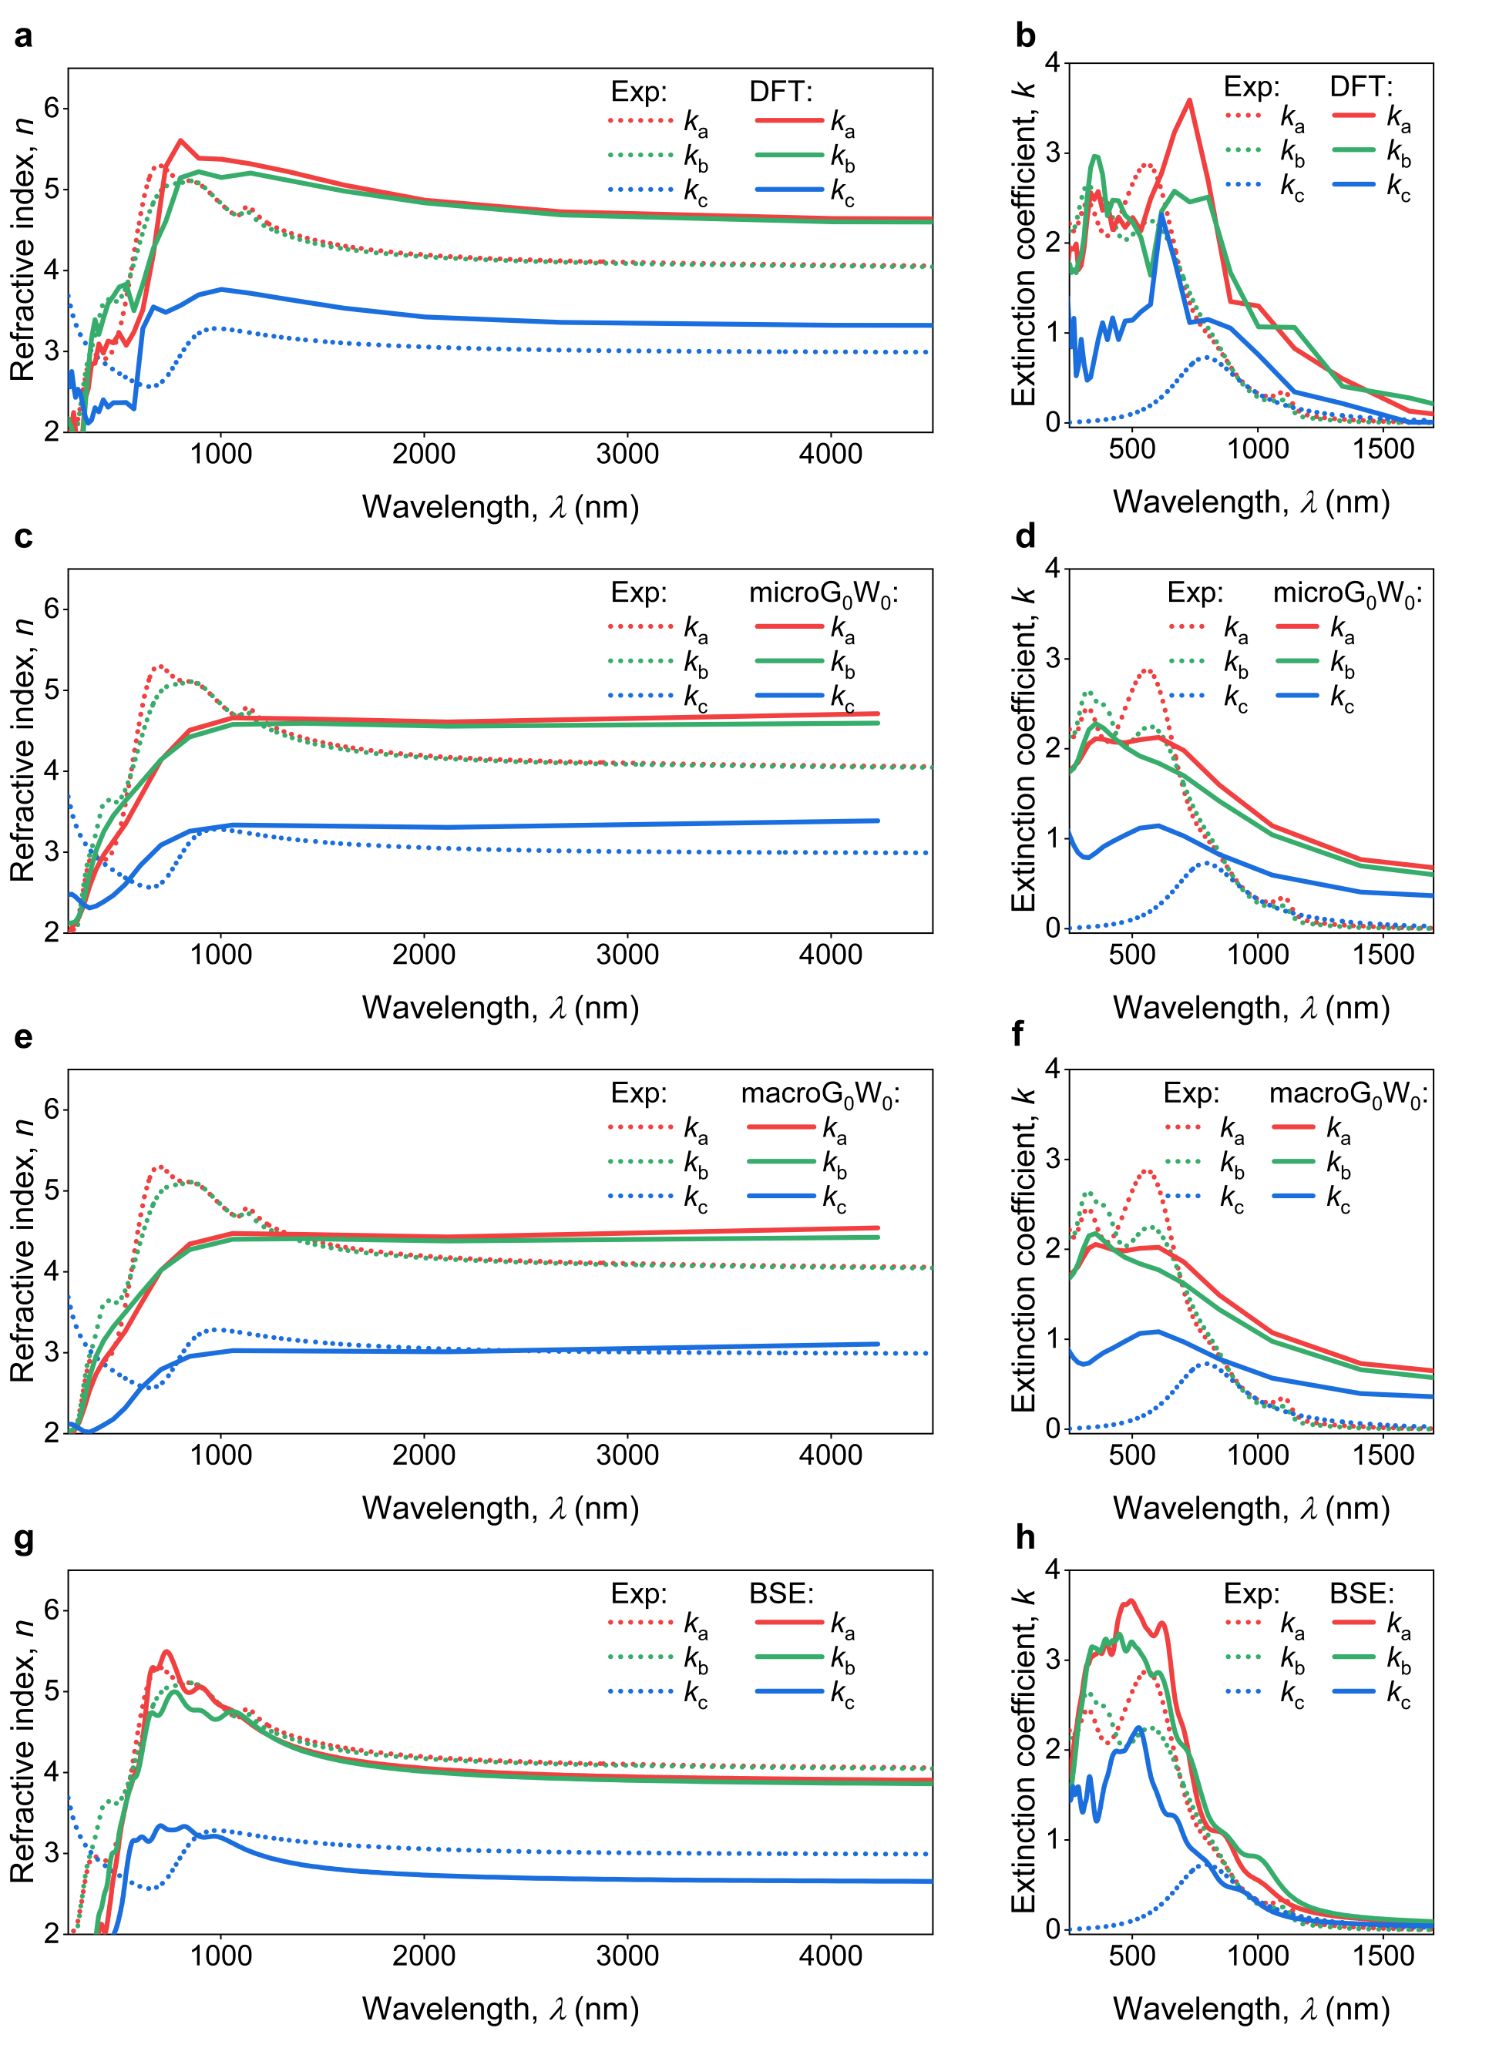
**

**Figure S11.** Optical properties of PdSe2 calculated within (a,b) DFT, (c,d) GW (from micro dielectric tensor), (e,f) GW (from macro dielectric tensor), (g,h) BSE. Theoretically calculated data for refractive index and extinction coefficient are shown with solid line, experimental data - with dotted lines.

**Supplementary Note 5: PdSe2 plasma frequency and effective transport mass.**

In Figure 2c of the main text the first Brillouin zone of orthorhombic PdSe2 is shown. In Figure 2d its bandstructure along high-symmetry paths is demonstrated. For these calculations we used PBE exchange-correlation functional with SOC taken into account. For calculation of free carrier density at room temperature we found the effective masses and separation from Fermi level of the valence band maximum (at Γ point) and conduction band minima (at SY and SX paths). A band with Fermi-level *F* with respect to the extremum point (positive *F* meaning that Fermi level is above the conduction band minimum or below the valence band maximum) contains free carriers of a density of , where *g* is degeneracy factor (not including spin degeneracy which is accounted in DOS), is the Fermi-Dirac distribution function and DOS(*E*) is electronic density of states within the considered band according to the parabolic band approximation. Next, the contributions of each band to the plasma frequency were calculated as , where the effective transport mass was found as *mt* = 3/(1/*m*a+1/*m*b+1/mc).

**Supplementary Note 6: PdSe2-based mid-IR photodetector**

Here we demonstrate extended measurements of a PdSe2-based mid-IR photodetector. Measurements were carried out in parallel for photocurrent and resistance using lock-in amplifier (LIA) and dc sourcemeter (SM). SM applied dc bias voltage *V*sdand recorded appearing current *I*sd, which then were recalculated into device resistance *R* = *V*sd/*I*sd. LIA measured photocurrent, that was generated under modulated at *f*mod = 911 Hz mid-IR illumination. Directly measured resistance and photocurrent then were recalculated into photovoltage as *V*ph = *I*ph*R*.

To check photogeneration at the central p-n junction, we measured spatial maps of the photocurrent at asymmetric voltages on the two top gates, with no bias voltage applied to the channel (Figure S12). In both cases, we did not observe any photocurrent generation.


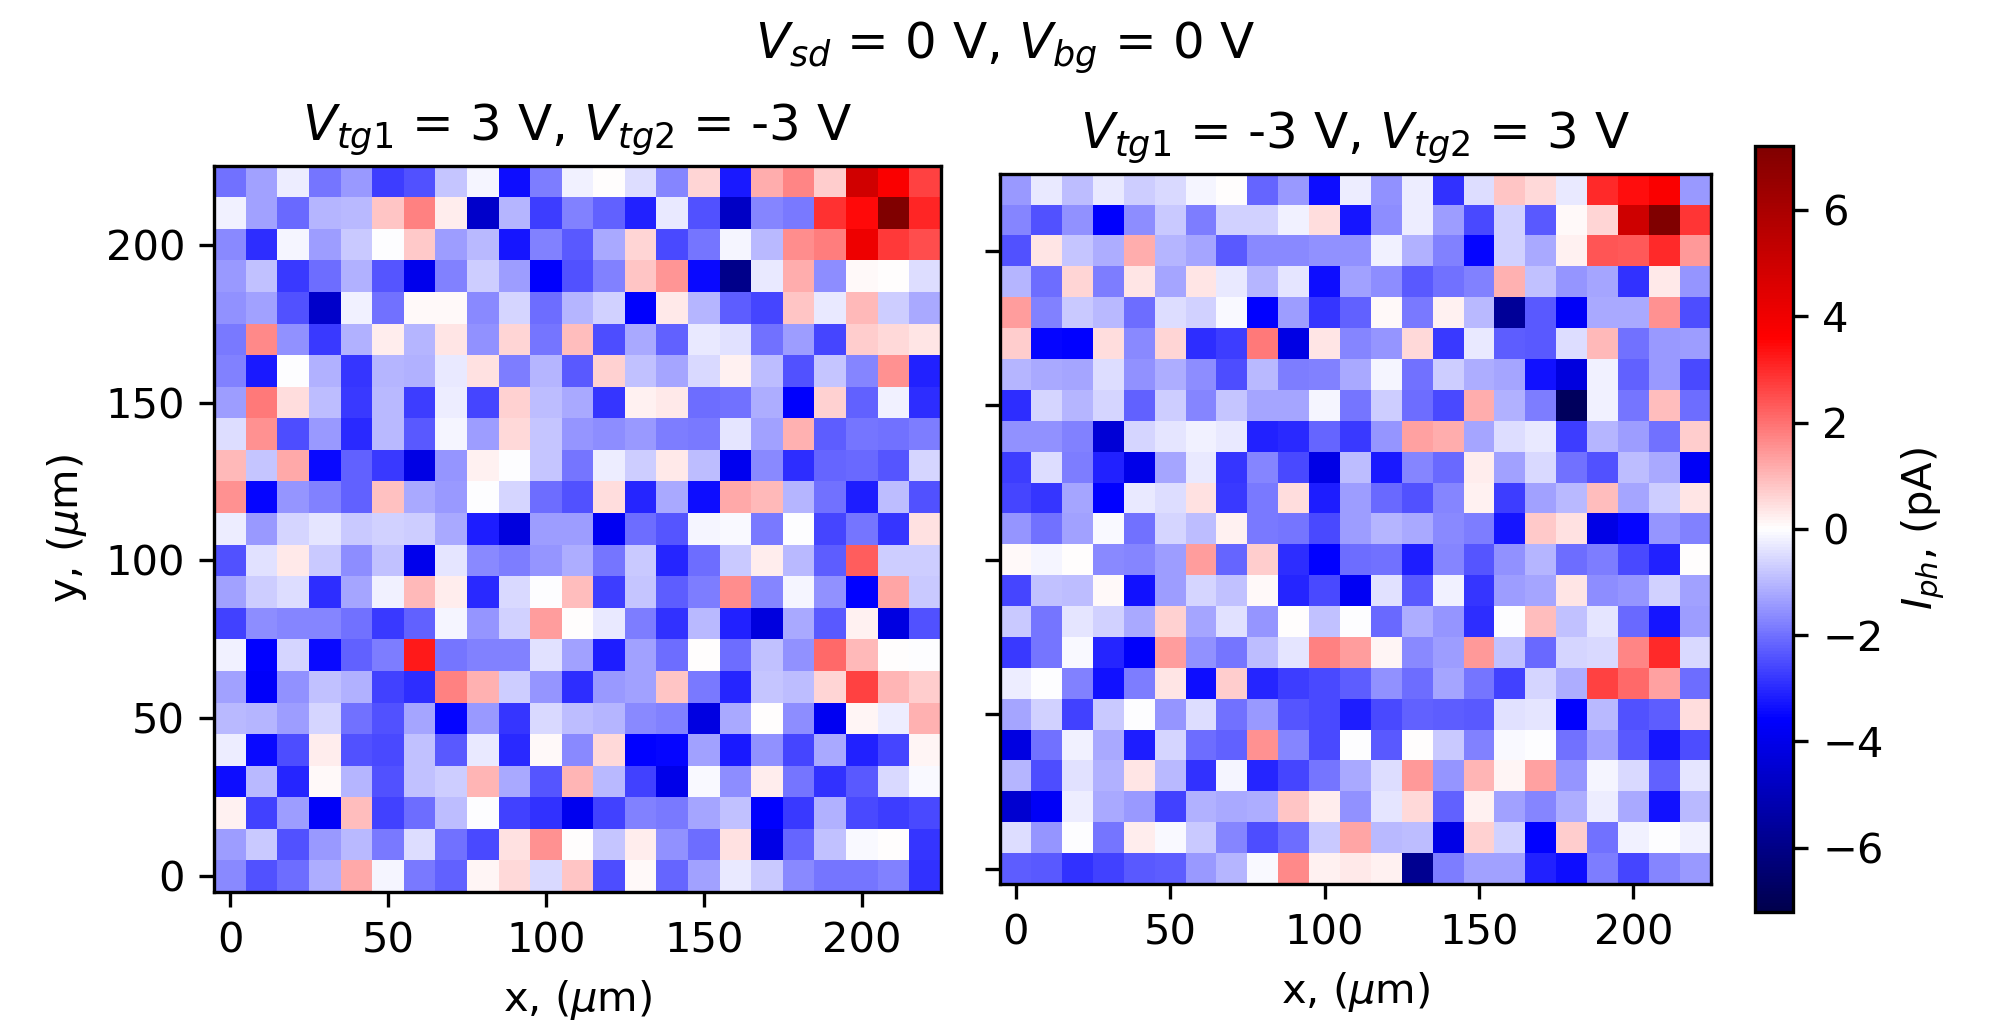


**Figure S12.** Spatial maps of photocurrent *I*ph when p-n and n-p junctions are formed, demonstrating the absence of photoresponse. Channel bias voltage *V*sd and global back gate voltage *V*BG are 0 V.

Below are the maps for dependencies on top gate voltages *TG*1 and *TG*2 for resistance *R* (top rows), photocurrent *I*ph (middle rows) and photovoltage *V*ph (bottom rows). Left columns obtained at source-drain bias voltage Vsd = 0.1 V, right columns at Vsd = −0.1 V. Maps divided into three Figures, obtained at different initial doping levels provided by the back gate voltages *V*BG: hole doping at *V*BG = −15 V (Figure S13), light electron doping at *V*BG = 0 V (Figure S14) and electron doping at *V*BG = +15 V (Figure S15).


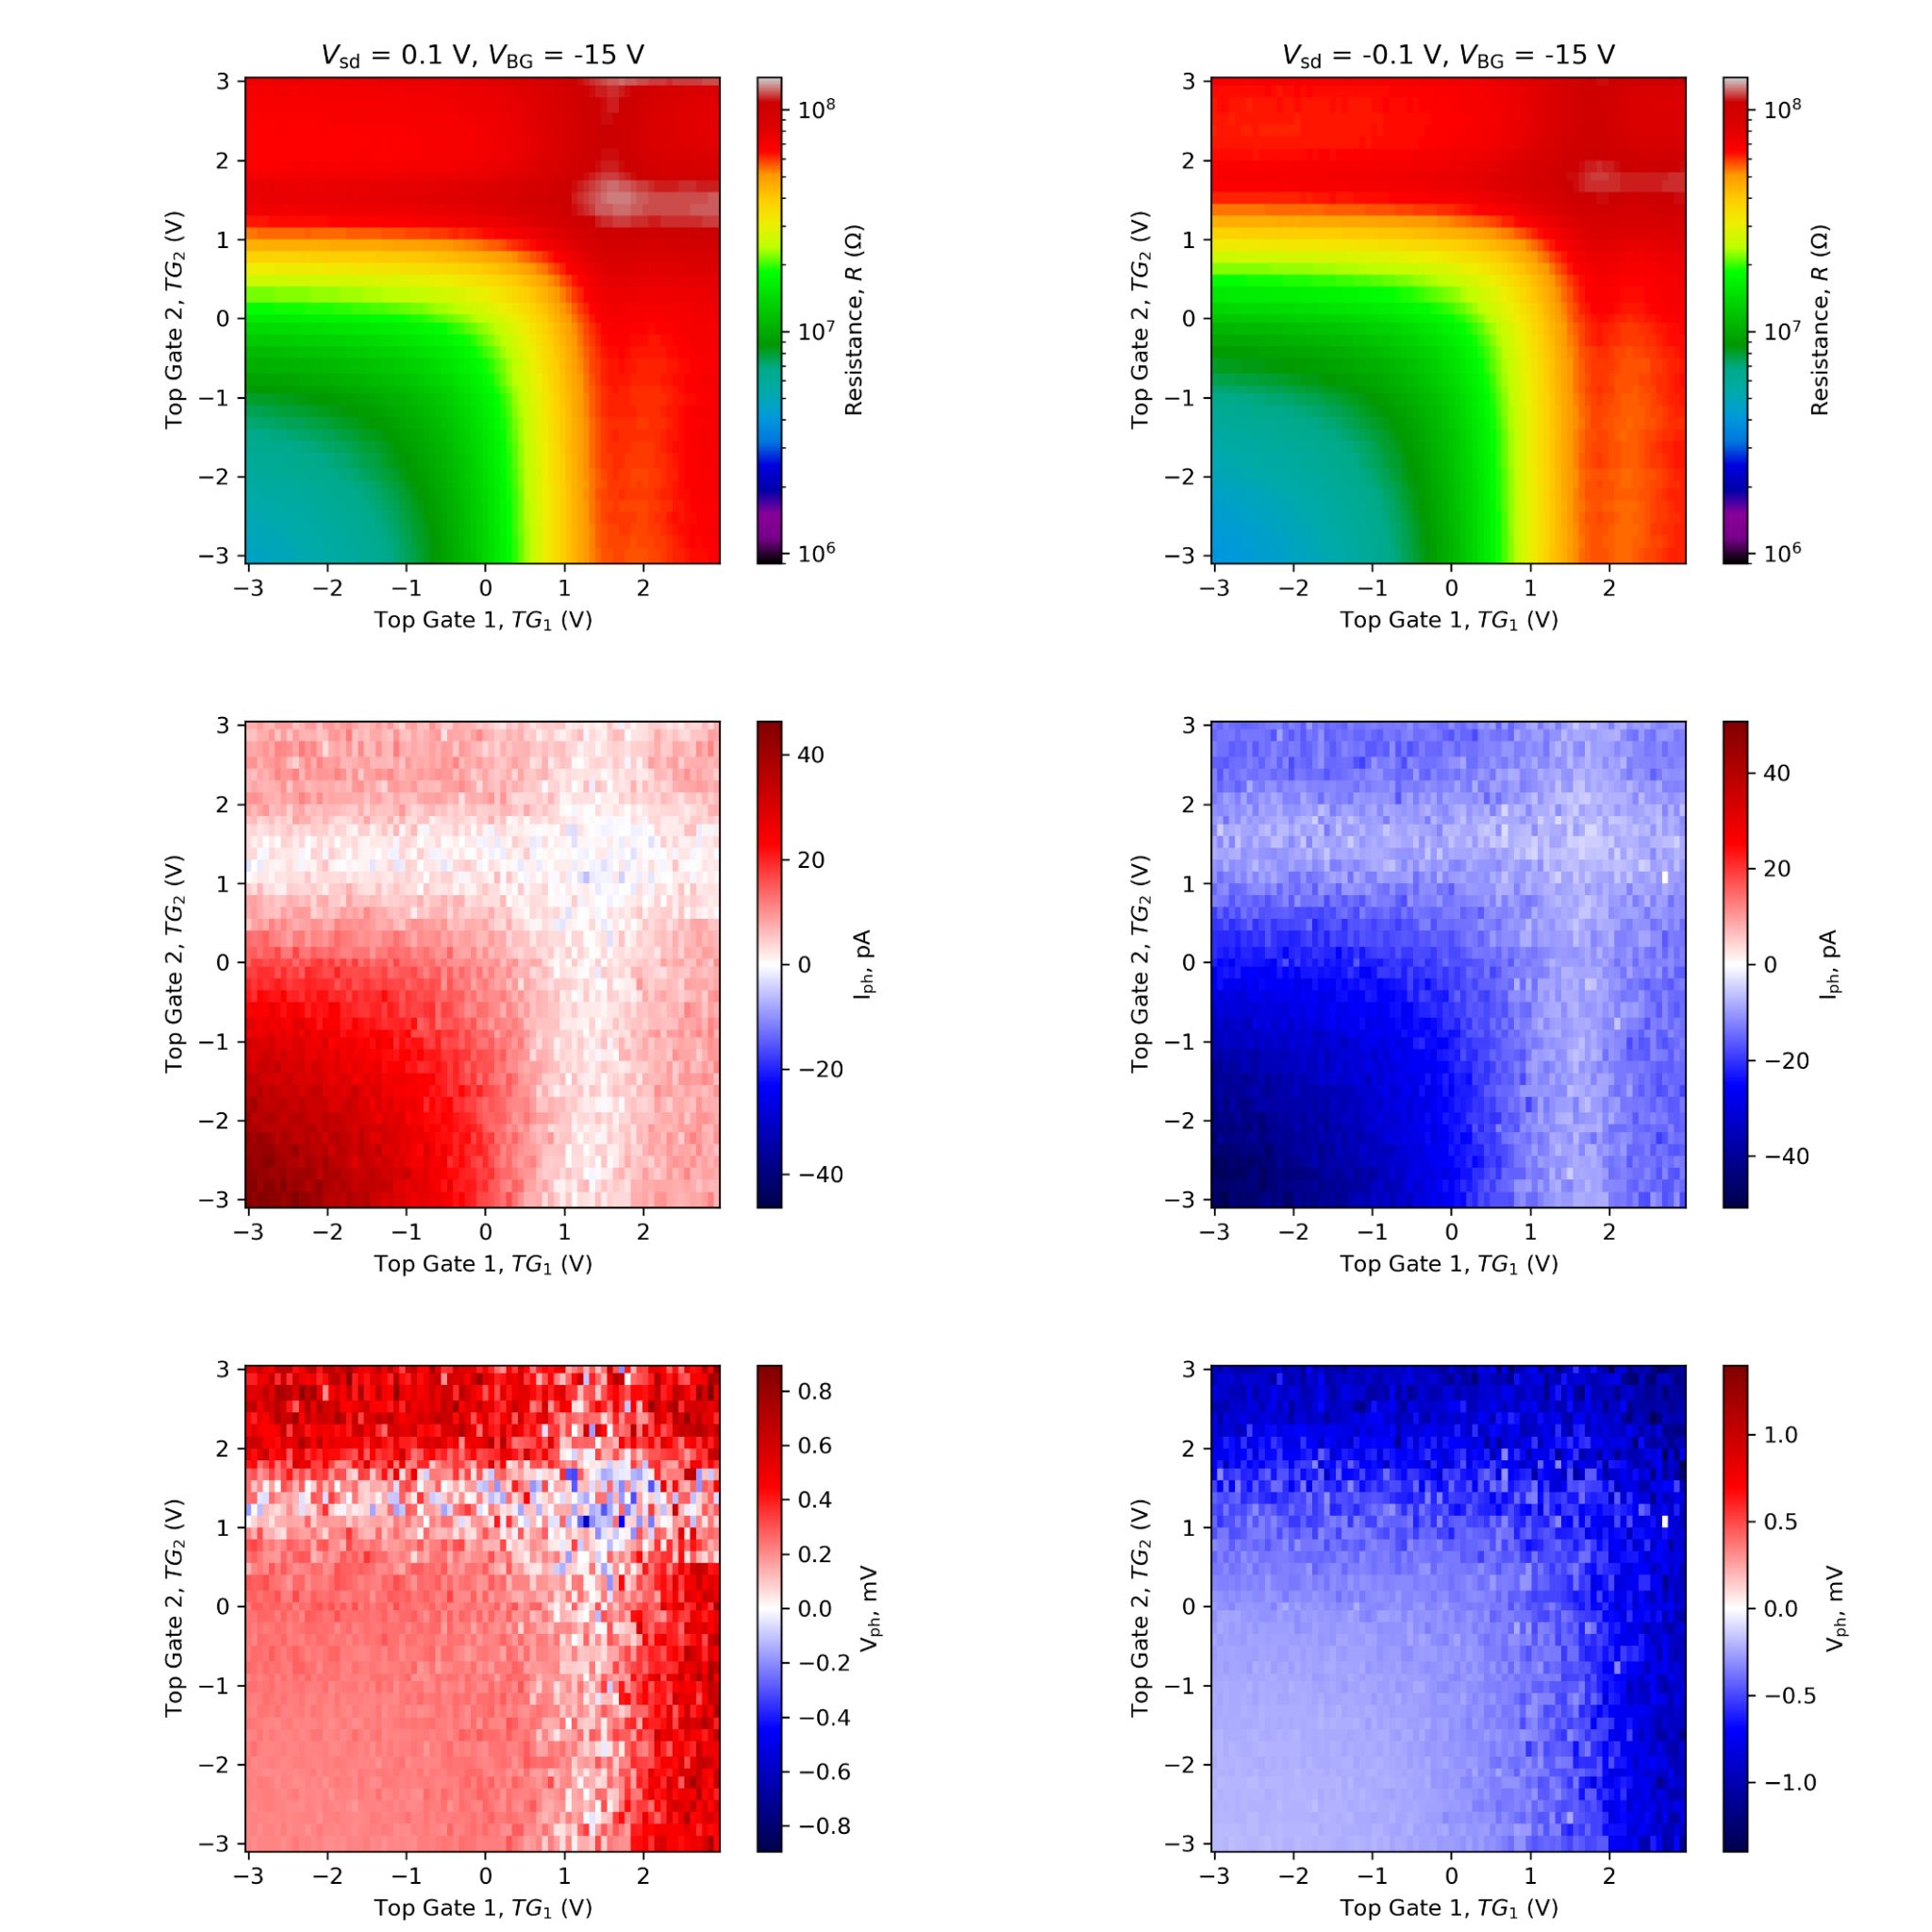


**Figure S13.** Hole-doped PdSe2-based mid-IR photodetector (*V*BG = −15 V). Resistance *R* (**top row**), photocurrent *I*ph (**middle row**) and photovoltage *V*ph (**bottom row**) dependencies on top gate voltages *TG*1 and *TG*2 at forward (**left column**) and backward (**right column**) bias voltage *V*sd.


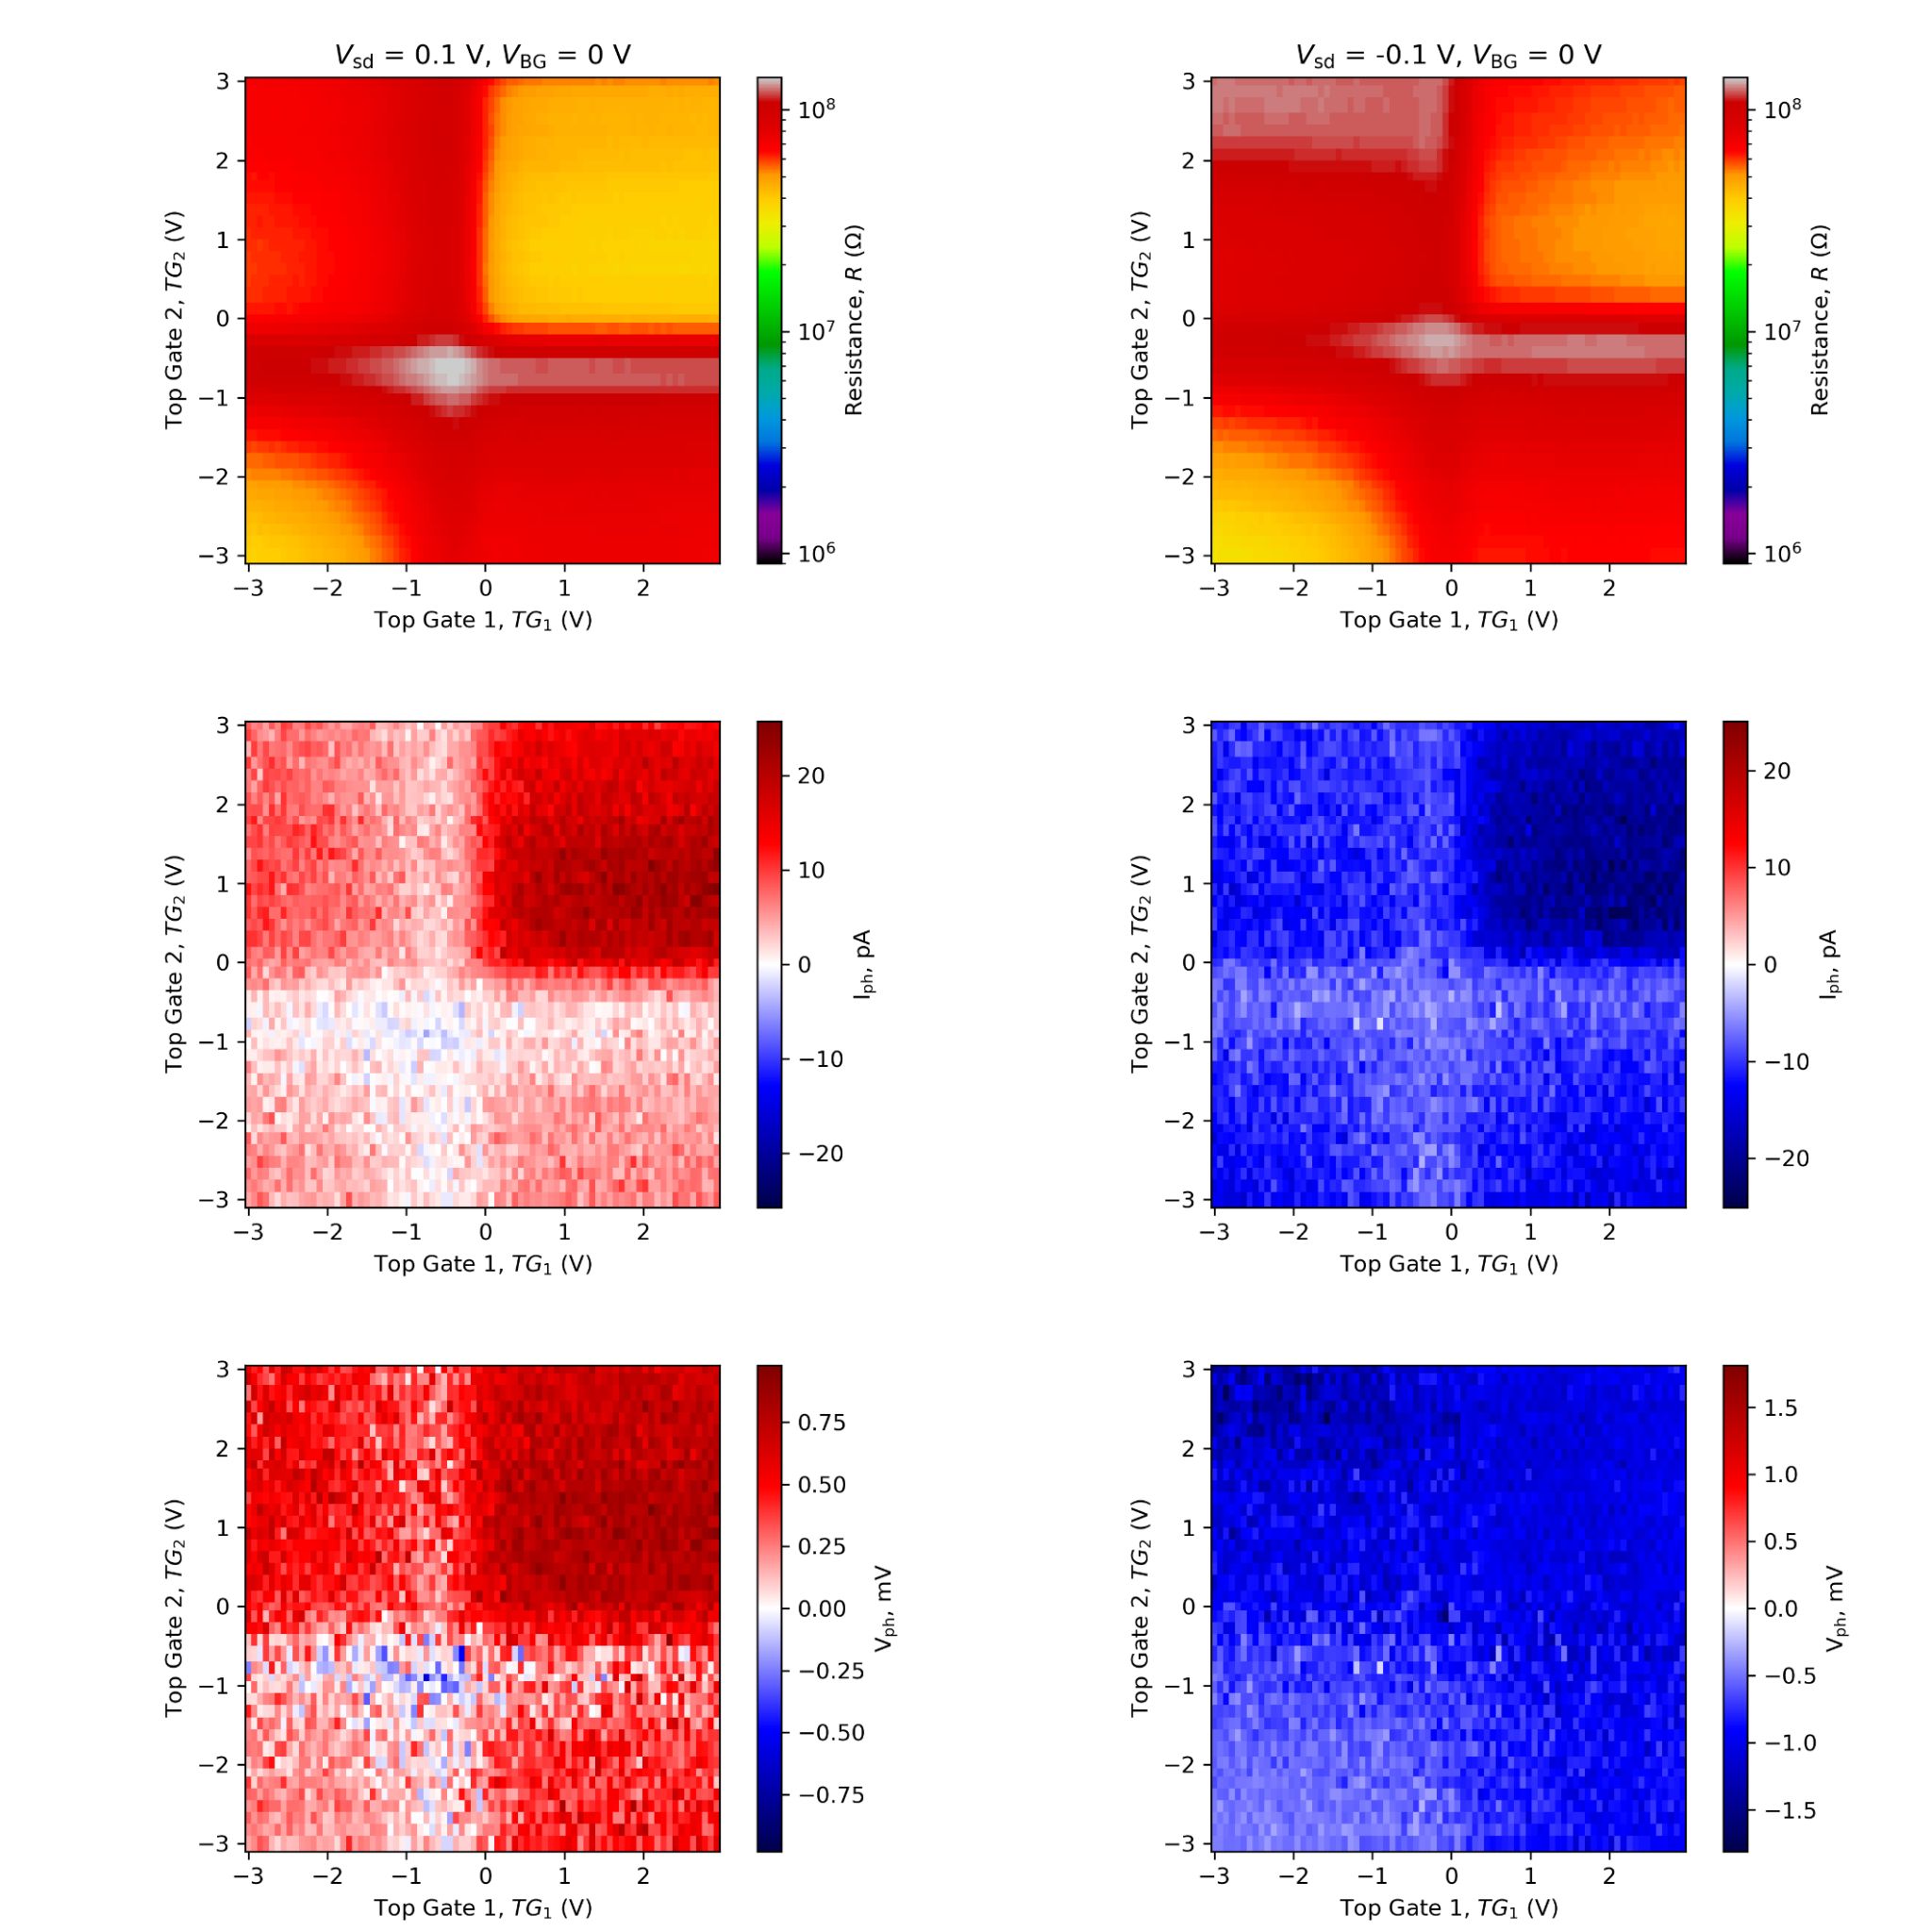


**Figure S14.** Slightly electron-doped PdSe2-based mid-IR photodetector (*V*BG = 0 V). Resistance *R* (**top row**), photocurrent *I*ph (**middle row**) and photovoltage *V*ph (**bottom row**) dependencies on top gate voltages *TG*1 and *TG*2 at forward (**left column**) and backward (**right column**) bias voltage *V*sd.


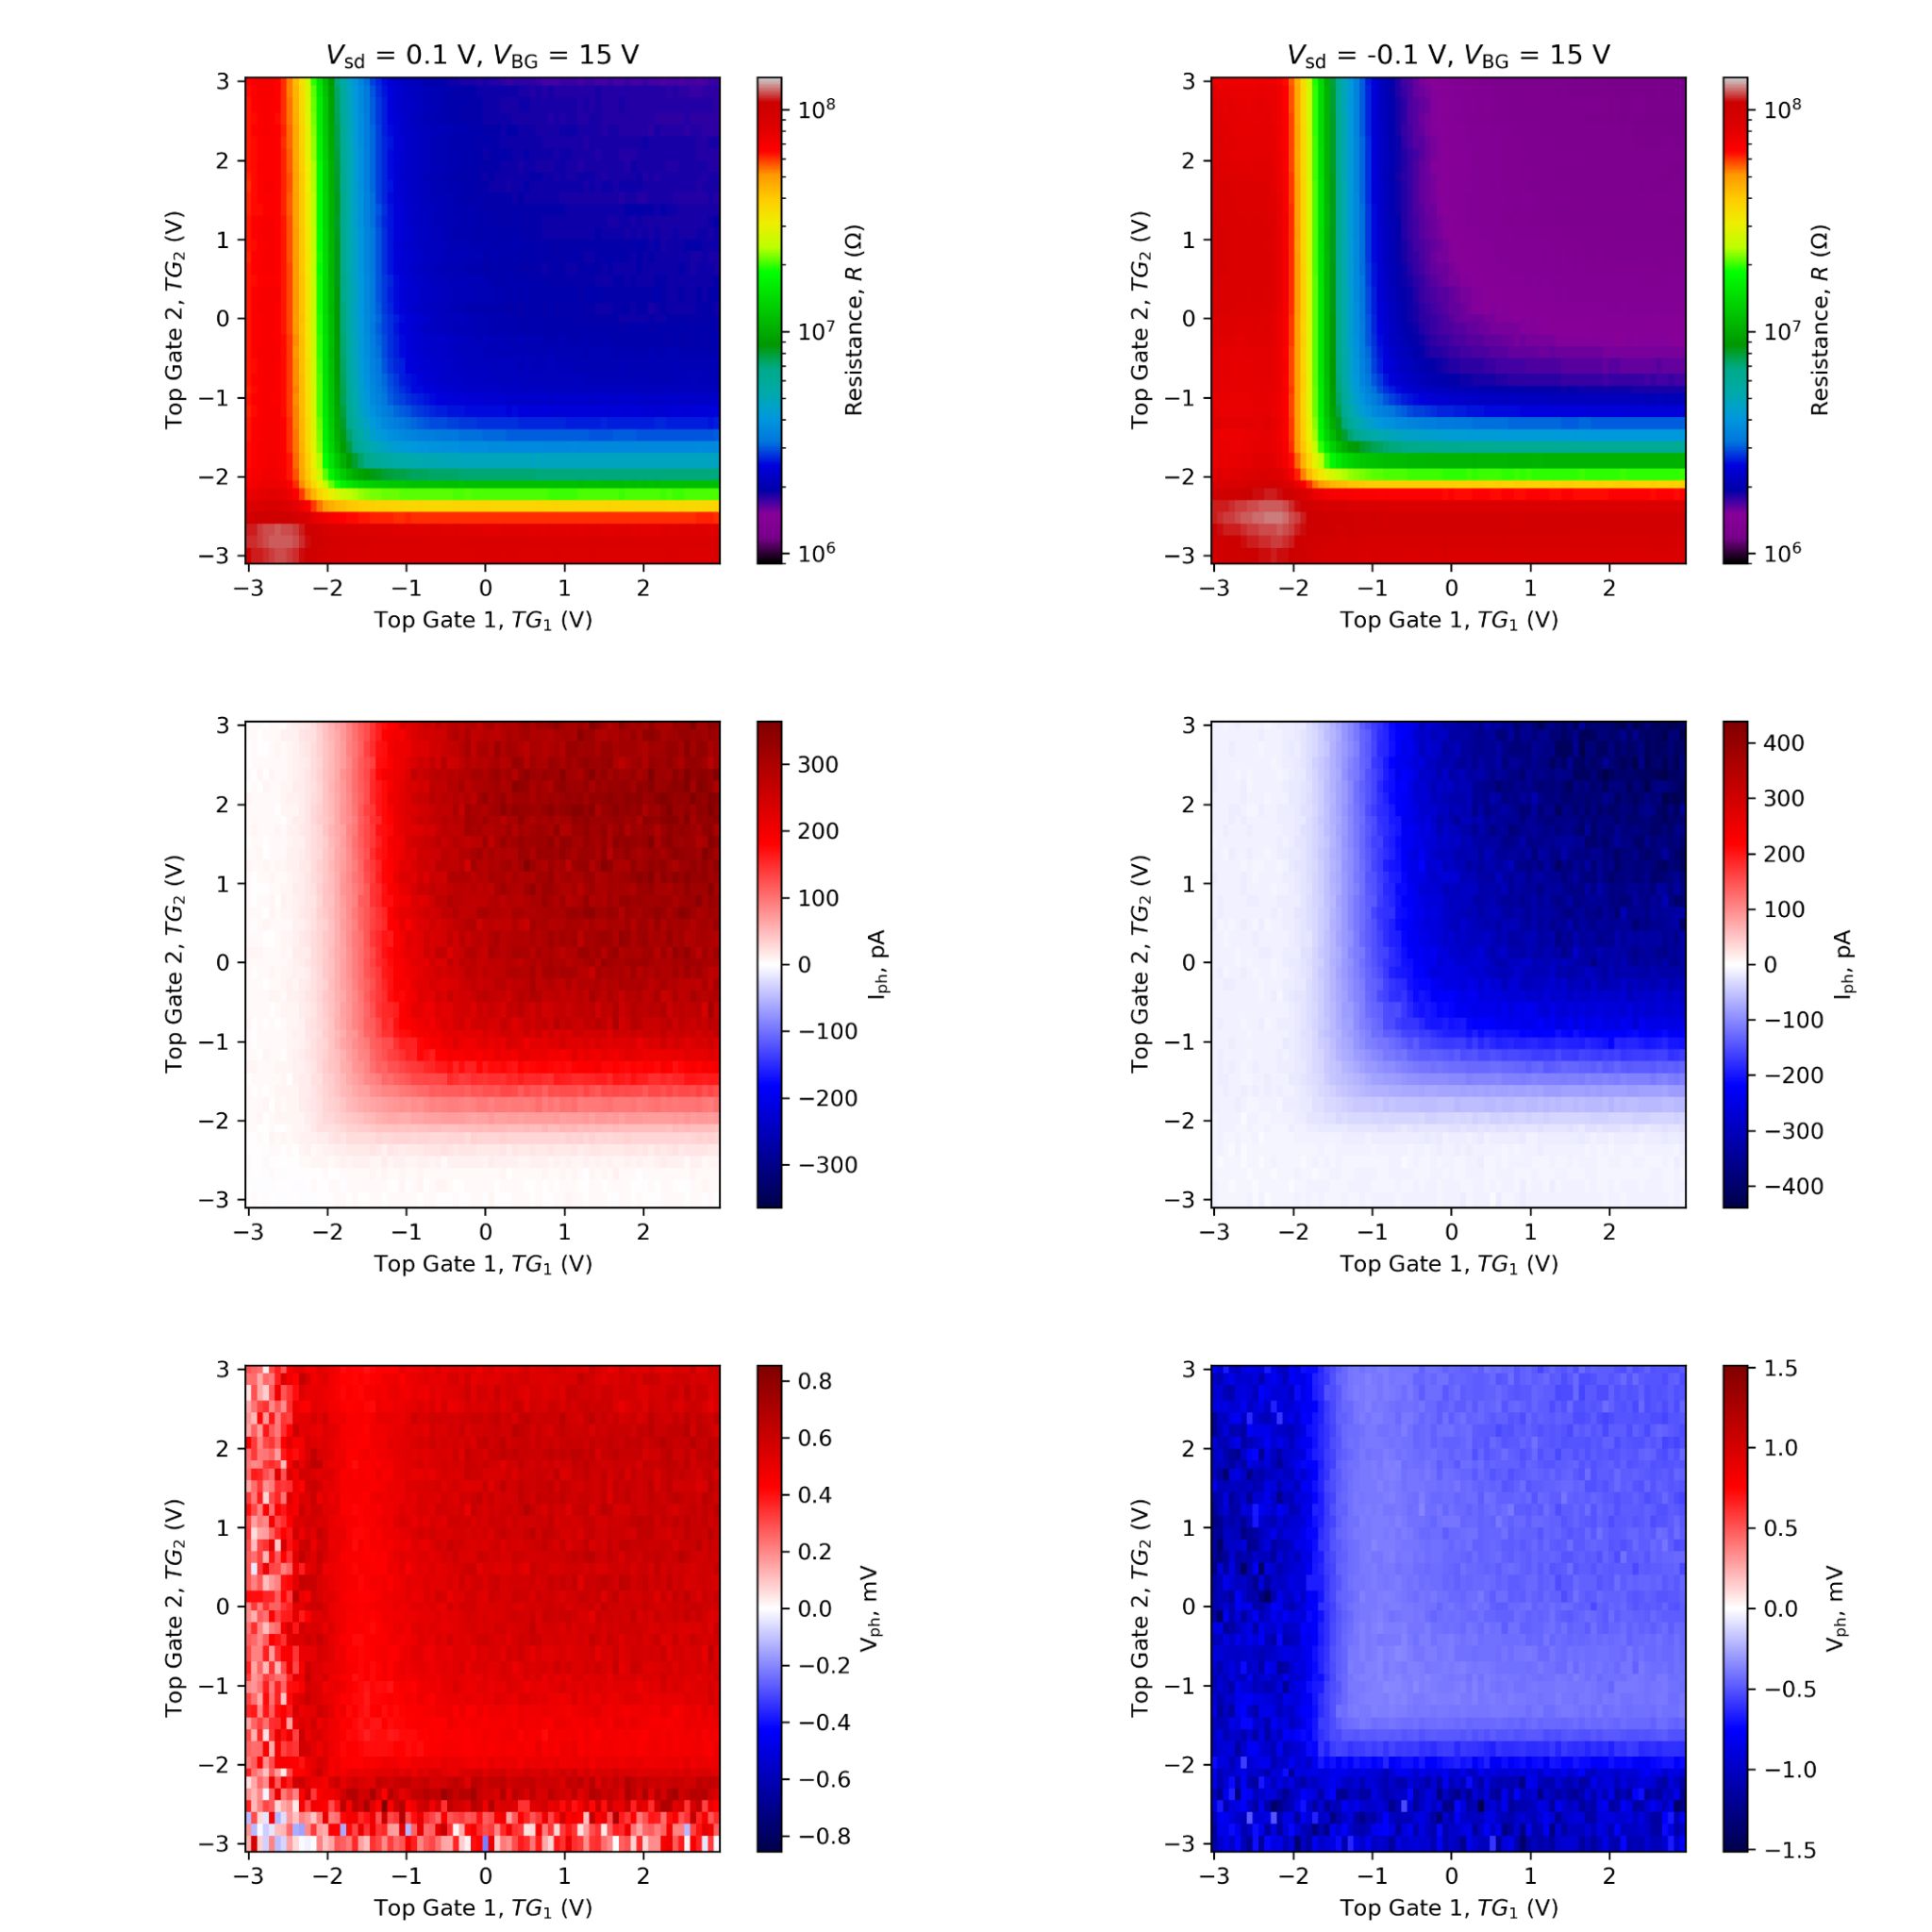


**Figure S15.** Electron-doped PdSe2-based mid-IR photodetector (*V*BG = +15 V). Resistance *R* (**top row**), photocurrent *I*ph (**middle row**) and photovoltage *V*ph (**bottom row**) dependencies on top gate voltages *TG*1 and *TG*2 at forward (**left column**) and backward (**right column**) bias voltage *V*sd.

**Supplementary Note 7: Transfer matrix maps calculations**

**
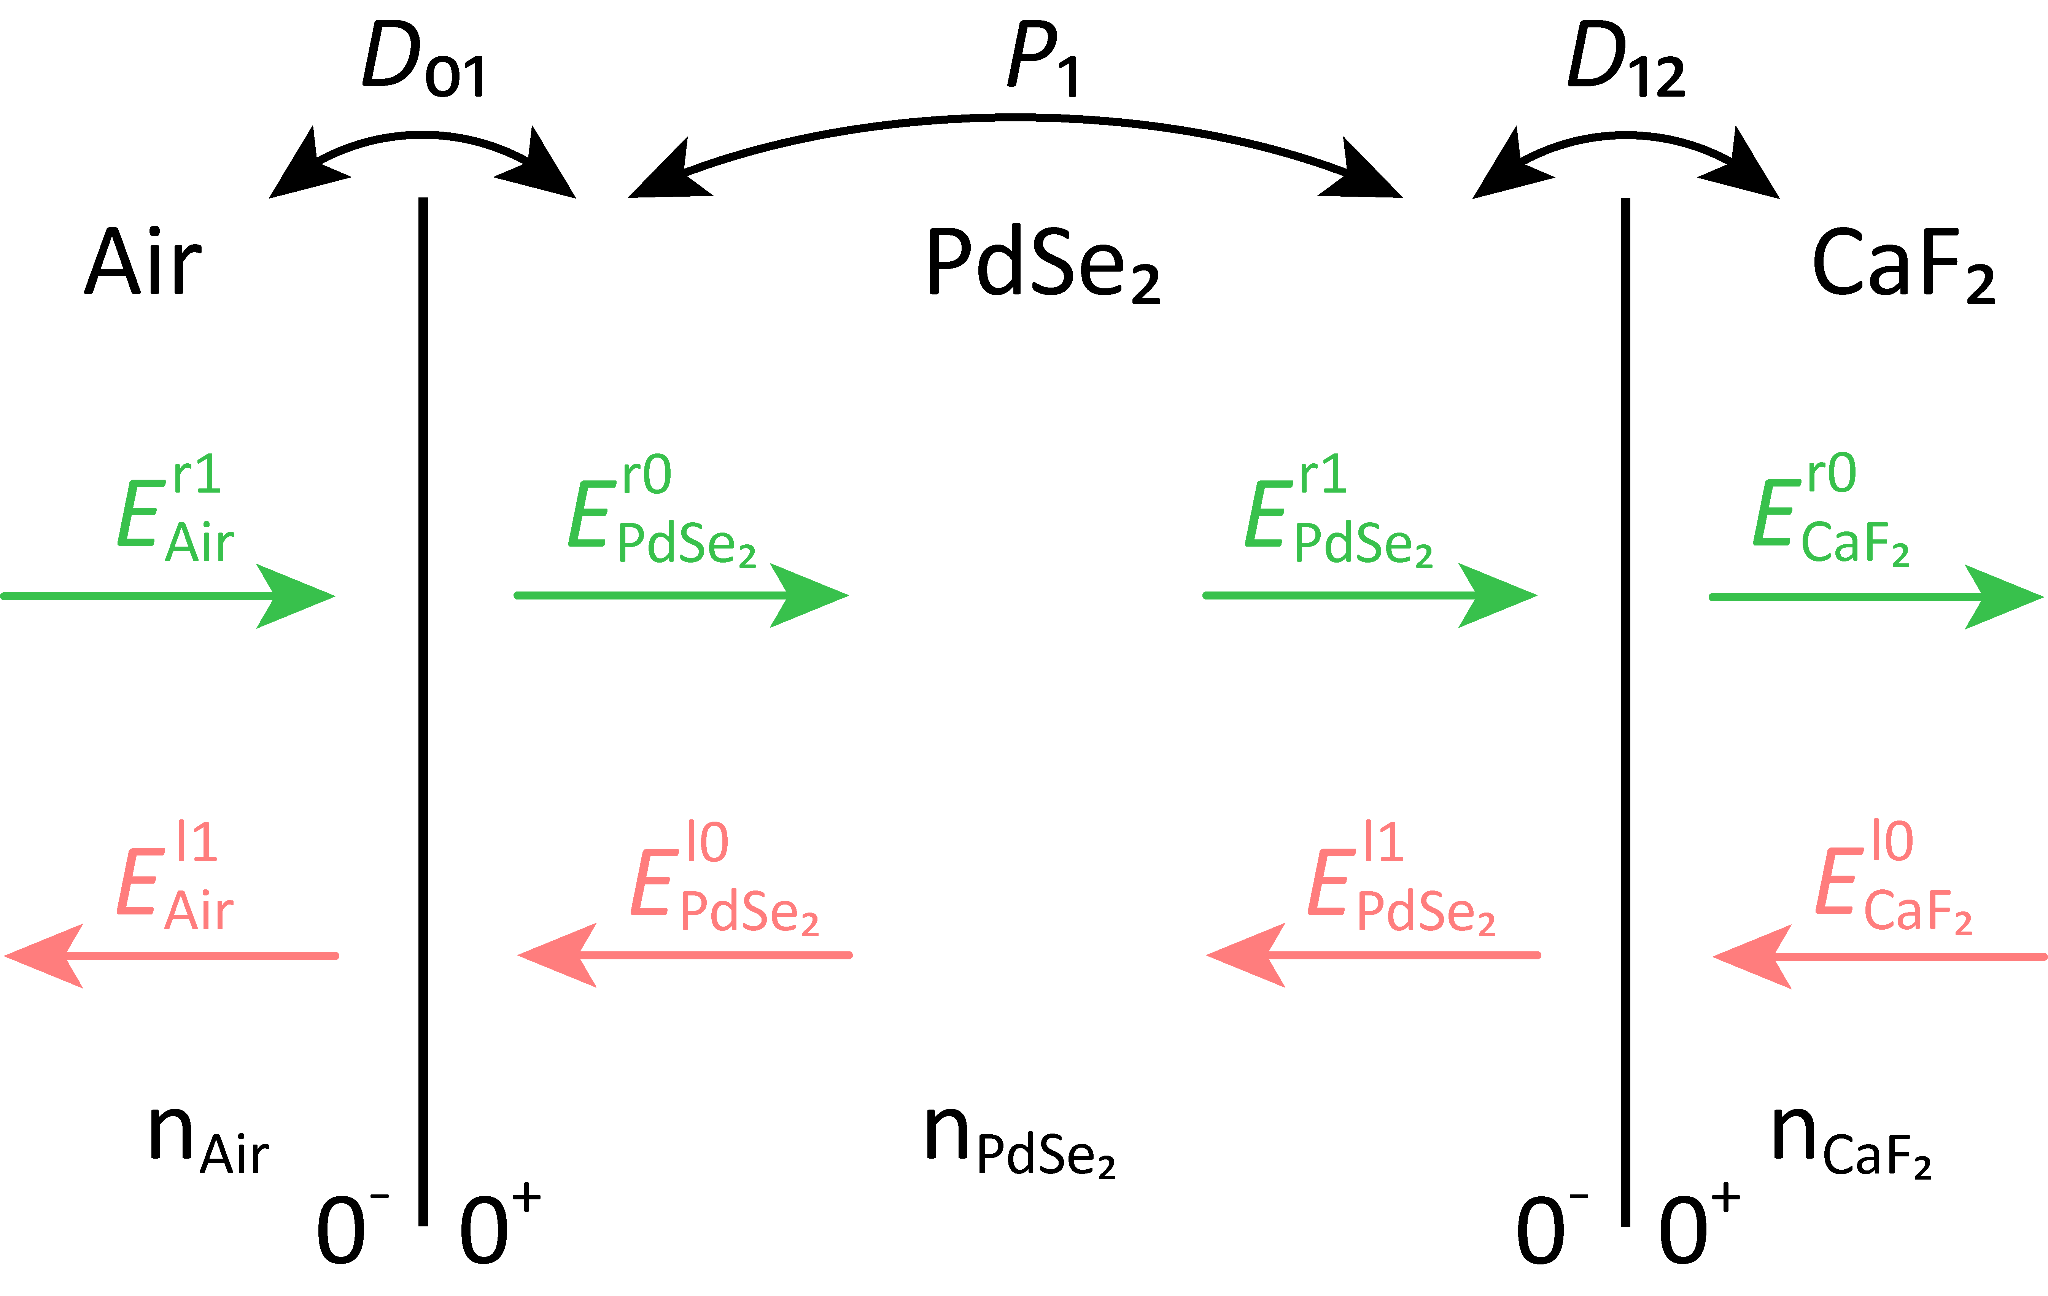
**

**Figure S16.** Transfer matrix representation of the transmission through the studied structure.

To analyze the interaction of electromagnetic waves with a layered medium, we used the matrix transfer method. This method allows us to generalize the accounting of all reflections within a layered system. To do this, the problem is divided into taking into account propagation matrices *P* between the interfaces and transmission matrices *D* on the interfaces of the system. These matrices express the relationships between various electromagnetic fields Figure S16:

The propagation *P* matrix can be expressed simply by taking into account the phase shift in the medium:

The transmission *D* matrix can be expressed in terms of complex Fresnel coefficients using:

Knowing matrices *P* and *D* for every part of the system, we can simply multiply them to obtain the transfer matrix *M* for the connection between the fields at the ends of the layered structure:

If we take into account that there is no field, because we do not illuminate the structure from the reverse side, then we can obtain complex Fresnel coefficients for the entire structure. In turn, this allows us to construct the dispersion of waveguide modes (see Figure 3d,g of the main text) and a reflection map (see Figure S8b and Figure S16) for the system. It is worth noting that for our calculations we used a bit more complex approach described in previous research18, but similar principles are applied.

**Supplementary Note 8: Scanning near-field microscopy**


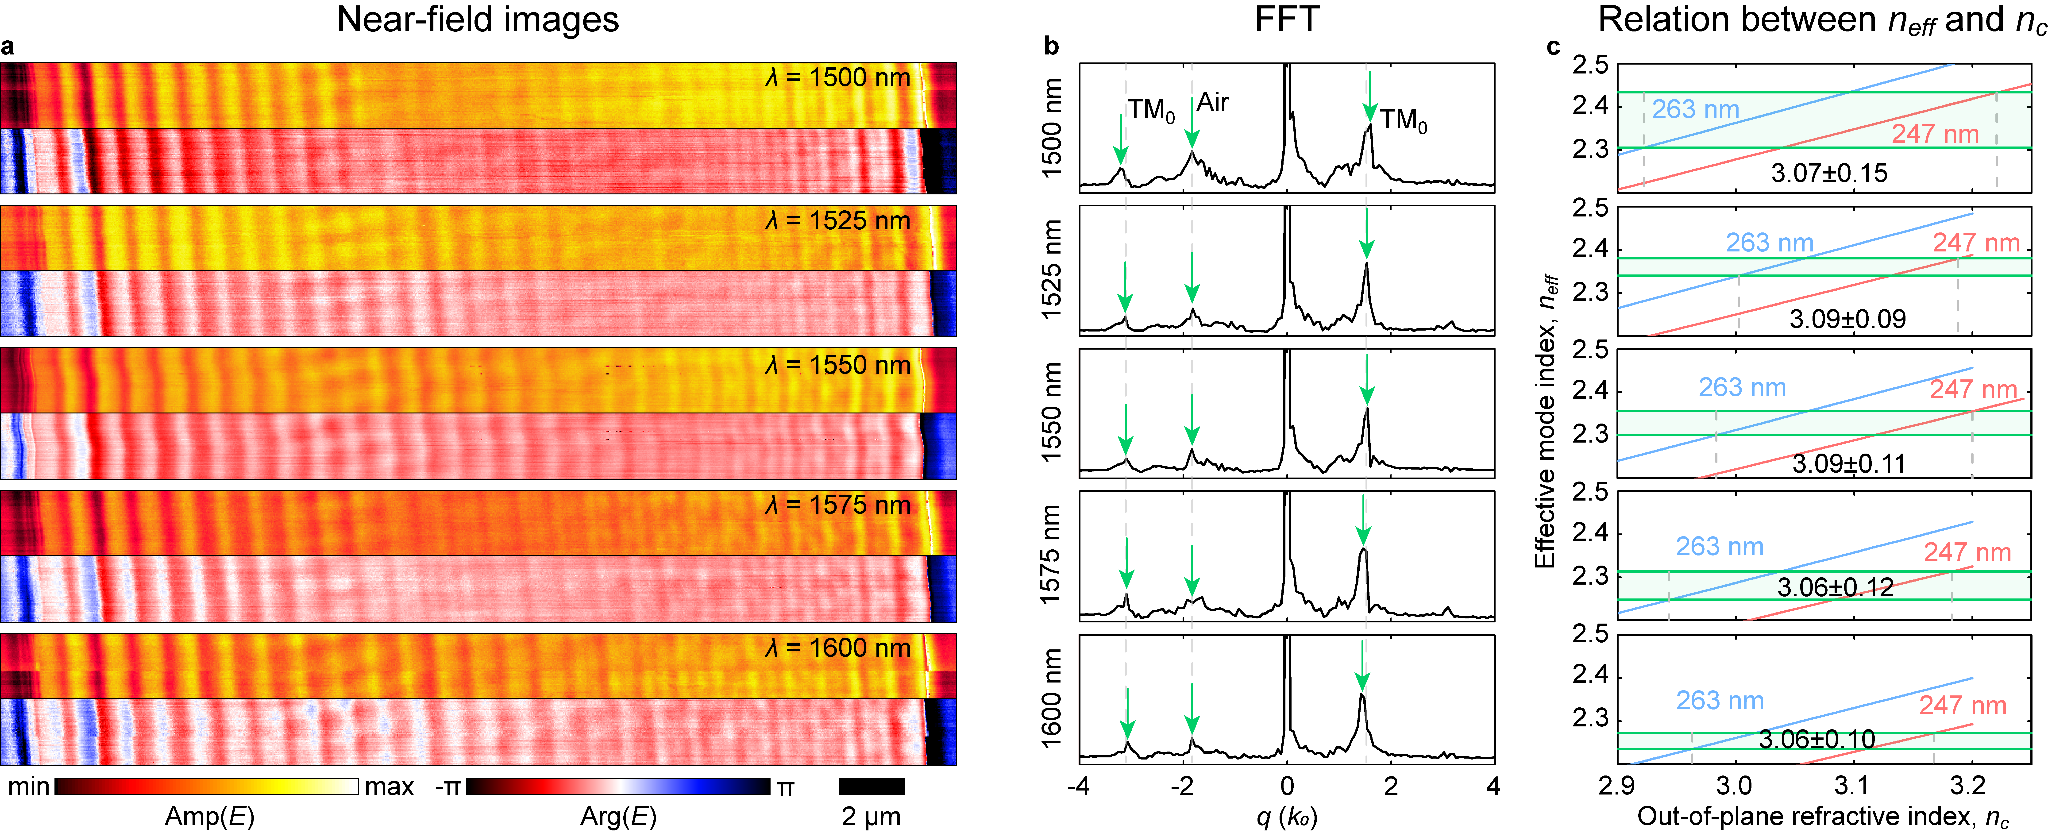


**Figure S17.** (a) Near-field amplitude Amp(*E*) and phase Arg(*E*) in the near-infrared wavelength range of 1500 nm to 1600 nm. (b) Fast Fourier transformation of the complex near-field signal taken from (a). Green arrows denote observable effective mode indexes: air and TM0. (c) Dependency of the effective TM0 mode index (𝑛eff) on the out-of-plane refractive index (𝑛𝑐), calculated for a 263 nm flake (blue line) and a 247 nm flake (red line). The thicknesses were derived from the errors in the AFM measurements. Green horizontal lines represent the effective mode index extracted from the near-field measurements, with the line thickness indicating the expected experimental error. Dashed gray vertical lines represent the extracted out-of-plane refractive index of the material. The in-plane refractive index for the calculations was taken from the extrapolated optical functions (Figure 2a of the main text).


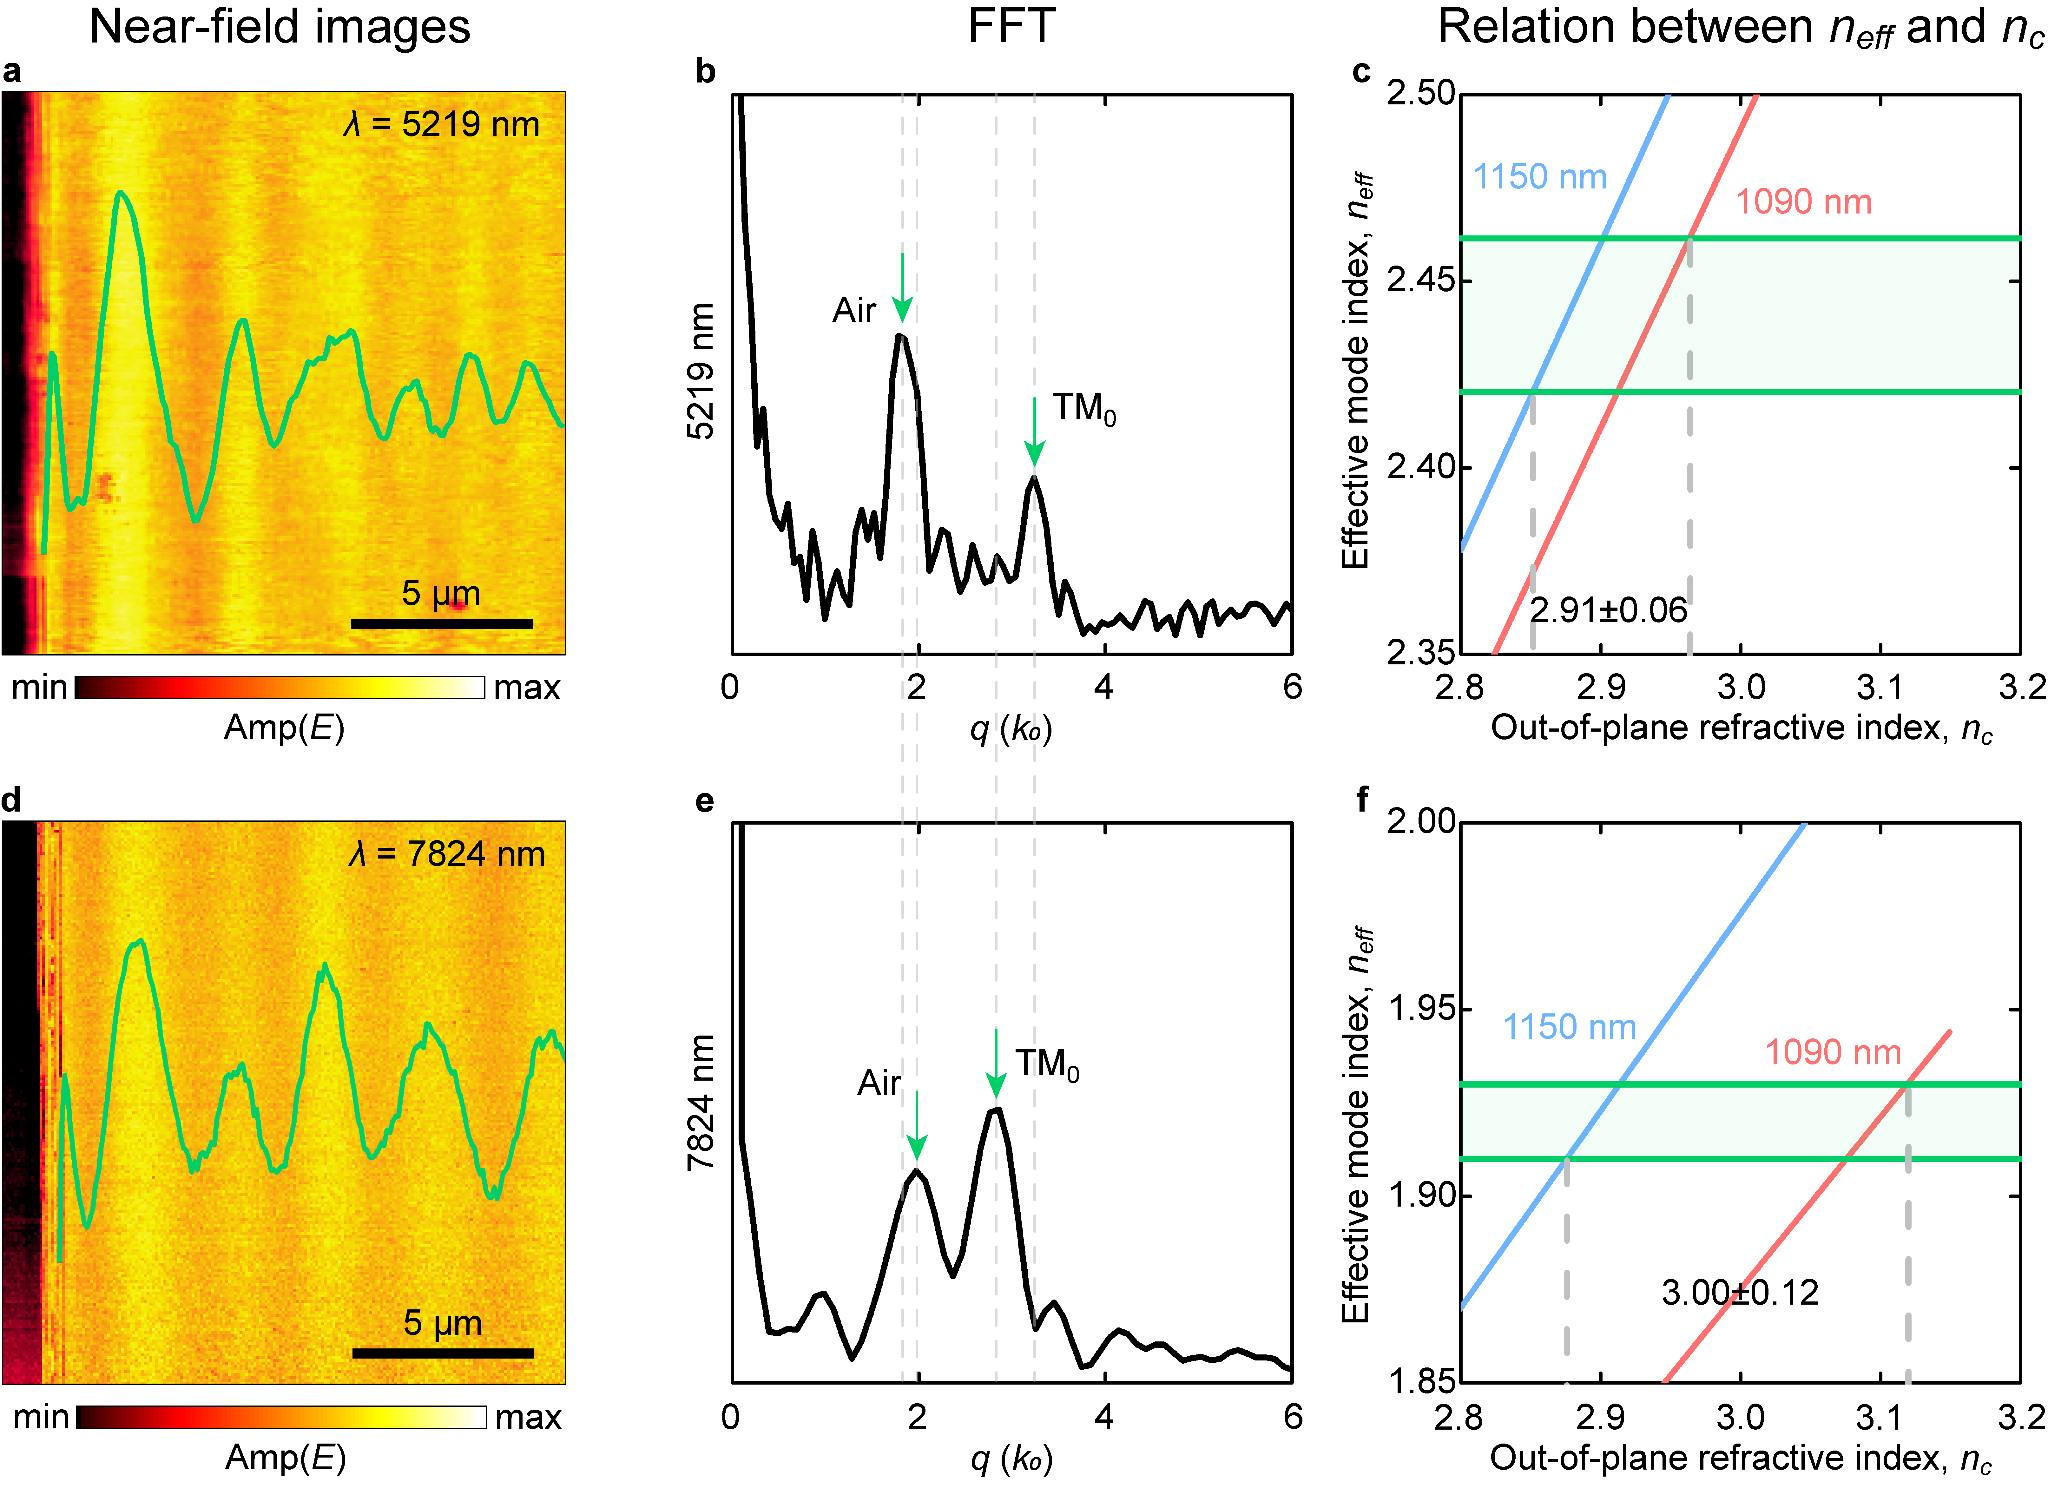


**Figure S18.** (a,d) Near-field amplitude Amp(*E*) in the mid-infrared wavelength range for 5219 nm and 7824 nm. (b,e) Fast Fourier transformation of the complex near-field signal taken from (a,d). Green arrows denote observable effective mode indexes: air and TM0. (c,f) Dependency of the effective TM0 mode index (𝑛eff) on the out-of-plane refractive index (𝑛𝑐), calculated for a 1150 nm flake (blue line) and a 1090 nm flake (red line). The thicknesses were derived from the errors in the AFM measurements. Green horizontal lines represent the effective mode index extracted from the near-field measurements, with the line thickness indicating the expected experimental error. Dashed gray vertical lines represent the extracted out-of-plane refractive index of the material. The in-plane refractive index for the calculations was taken from the extrapolated optical functions (Figure 2a of the main text).

To unequivocally validate out-of-plane components of the PdSe₂ dielectric tensor, we investigated properties of TM₀ modes supported by PdSe₂ planar waveguides. For this purpose, we exfoliated two flakes of different thicknesses (≈225 nm and ≈1.12 μm) on a CaF₂ substrate, which formed planar waveguides in the near- and mid-infrared wavelength ranges, respectively. To study mode properties, we used scattering-type Scanning Near-field Optical Microscopy (s-SNOM) in reflection mode. A parabolic mirror focused the TM-polarized light on the apex of an atomic force microscope tip covered with metal. The atomic force microscope operated in tapping mode, allowing us to filter the near-field signal through tip oscillations. The light scattered from the probe and the flake edges was collected using the same parabolic mirror.

The oscillations observed in the measurements originated from the interference between light scattered directly from the tip to the detector and light that propagated in the form of a waveguide mode before scattering at the flake edge. These shifts are linked to the relative orientation between the scattering edge of the flake and the spatial geometry of the s-SNOM setup, and can be described by the equation:

Where 𝛼 is the angle between the illumination wavevector (*k*) and its projection on the sample's surface plane (*k*II), 𝛽 is the angle between the projection of the wavevector (*k*II) and the scattering edge, 𝑛eff is the effective index of the mode, and 𝑛obs is the observable effective mode index.

To extract the exact value of the frequency shift we used the air mode as our marker. Due to it having no dispersion and always having an effective mode index close to one. The frequency shift for peak positions in Figure S17b of the TM₀ mode for positive and negative *q*(*k*₀) values is attributed to its counter-propagating directions, which vary based on the edge of the flake from which it scatters. The air mode for positive *q*(*k*₀) is not observable due to the frequency shift, which results in its effective mode index being near zero. The asymmetry in the zero-frequency peak is possibly due to its merging with the shifted air mode. At the same time due to the unresolved near-field phase for measurements in mid-infrared region Figure S18, the FFT shows only positive *q*(*k*₀). There are three peaks: the left peak corresponds to the zero-frequency background, and the other two are the result of traveling air and TM0 waves. Two measurements were made with different orientations of the sample, thus the frequency shift effect for the air mode can be observed.

Lastly, to study the correlation between effective mode index in the planar waveguides and the out-of-plane refractive index of the material we performed dispersion calculations for all the measurements (Figure S17c and Figure S18c,f). The extracted out-of-plane refractive index components are in good agreement with plotted constants from Figure 2a of the main text

**Supplementary Note 9: Nanoparticles**

**Nanoparticles fabrication**

To synthesize the palladium diselenide (PdSe₂) nanoparticles (NPs), we utilized a diode-pumped Teta 20 laser system (Avesta) operating at a wavelength of 1,030 nm. The laser emitted pulses with an energy of 30 µJ and duration of 250 fs at a repetition rate of 1 kHz. A 100 mm focal length lens was employed to focus the laser beam onto the surface of a synthetically grown PdSe₂ crystal immersed in deionized water (18.2 MOhm·cm, Milli-Q, Merck Millipore, Germany). The focusing resulted in a laser spot size of approximately 50 µm on the crystal surface, providing sufficient energy density for effective ablation. The laser ablation process was conducted for a duration of 30 minutes at room temperature. Throughout this period, the laser pulses interacted with the crystal surface, causing plasma plume generation with a subsequent cavitation bubble formation. The vapor within the bubble is a zone where solid crystallization and the formation of atomic clusters took place. The collapse of the cavitation bubble led to the ejection of PdSe₂ particles into the surrounding water forming a colloidal suspension of nanoparticles. The resulting colloidal solution exhibited a uniform appearance, indicating a well-dispersed nanoparticle suspension. The concentration of PdSe₂ nanoparticles in the solution was approximately 0.1 mg/mL, as determined by measuring the weight change of PdSe₂ crystal before and after laser ablation. The nanoparticle suspension was stable at room temperature, showing no visible signs of sedimentation or aggregation over time. The laser ablation in liquid technique provided a straightforward and chemical-free method for synthesizing high-quality PdSe₂ nanoparticles.

**Nanoparticle photoresponse calculations**

For calculating the extinction, scattering and absorption cross-section () of the nanospheres, we used the extended Mie theory with radial anisotropy. For PdSe2, the radial and tangential dielectric functions, εr and εt respectively were assumed as follows:

where the complex dielectric function is related to the refractive index and extinction coefficient as *εj*=(*nj*+*ikj*)2 where *j*=*a*, *b*, *c*.

Next, to estimate the temperature rise caused by the incident radiation, we used the expression20:

Here, epresents the heating power per single particle. We assumed *I*0 = 3.2×105 W/m2. *V*, *A*, and *r* = 1 cm are the volume, surface area, and characteristic length of the particle solution, respectively. *k* and *Nu* ~ 5 are the thermal conductivity of water and the Nusselt number, correspondingly. The concentration of nanoparticles in the solution was set to *f*N = 4.2×1014 m−3 to match the conditions described by Rastinehad et al.21

**Supplementary Note 10: Tabulated optical constants**

**Table S4.** PdSe2 anisotropic optical constants.

| *λ* (nm) | *n*a | *k*a | *n*b | *k*b | *n*c | *k*c |
| --- | --- | --- | --- | --- | --- | --- |
| 250 | 1.97242 | 2.21705 | 1.9133 | 2.13607 | 3.68747 | 0.00627 |
| 251 | 1.98095 | 2.20808 | 1.9163 | 2.13048 | 3.67452 | 0.00637 |
| 252 | 1.98859 | 2.19944 | 1.91861 | 2.12555 | 3.66184 | 0.00647 |
| 253 | 1.99538 | 2.19118 | 1.92029 | 2.12133 | 3.64943 | 0.00657 |
| 254 | 2.00138 | 2.18335 | 1.92141 | 2.11784 | 3.63727 | 0.00668 |
| 255 | 2.00664 | 2.176 | 1.92204 | 2.11511 | 3.62536 | 0.00679 |
| 256 | 2.01121 | 2.16918 | 1.92225 | 2.11315 | 3.6137 | 0.00689 |
| 257 | 2.01516 | 2.1629 | 1.92211 | 2.11196 | 3.60226 | 0.007 |
| 258 | 2.01853 | 2.15722 | 1.92168 | 2.11157 | 3.59106 | 0.00711 |
| 259 | 2.0214 | 2.15214 | 1.92103 | 2.11196 | 3.58007 | 0.00722 |
| 260 | 2.02381 | 2.14768 | 1.92021 | 2.11314 | 3.5693 | 0.00733 |
| 261 | 2.02582 | 2.14387 | 1.91929 | 2.11509 | 3.55873 | 0.00744 |
| 262 | 2.02749 | 2.1407 | 1.91832 | 2.1178 | 3.54836 | 0.00756 |
| 263 | 2.02888 | 2.13819 | 1.91736 | 2.12126 | 3.53819 | 0.00767 |
| 264 | 2.03003 | 2.13633 | 1.91646 | 2.12546 | 3.52821 | 0.00779 |
| 265 | 2.03101 | 2.13513 | 1.91567 | 2.13036 | 3.51841 | 0.0079 |
| 266 | 2.03186 | 2.13456 | 1.91502 | 2.13595 | 3.50879 | 0.00802 |
| 267 | 2.03263 | 2.13464 | 1.91457 | 2.1422 | 3.49934 | 0.00814 |
| 268 | 2.03336 | 2.13533 | 1.91436 | 2.14908 | 3.49006 | 0.00826 |
| 269 | 2.0341 | 2.13663 | 1.91442 | 2.15657 | 3.48095 | 0.00838 |
| 270 | 2.03488 | 2.13853 | 1.91478 | 2.16464 | 3.47199 | 0.0085 |
| 271 | 2.03575 | 2.14099 | 1.91548 | 2.17325 | 3.46319 | 0.00863 |
| 272 | 2.03675 | 2.144 | 1.91654 | 2.18238 | 3.45454 | 0.00875 |
| 273 | 2.0379 | 2.14755 | 1.91799 | 2.19199 | 3.44604 | 0.00888 |
| 274 | 2.03923 | 2.15159 | 1.91986 | 2.20205 | 3.43769 | 0.009 |
| 275 | 2.04078 | 2.15612 | 1.92217 | 2.21253 | 3.42947 | 0.00913 |
| 276 | 2.04258 | 2.1611 | 1.92492 | 2.22339 | 3.42138 | 0.00926 |
| 277 | 2.04463 | 2.16651 | 1.92815 | 2.23461 | 3.41343 | 0.00939 |
| 278 | 2.04698 | 2.17233 | 1.93187 | 2.24614 | 3.40561 | 0.00952 |
| 279 | 2.04963 | 2.17852 | 1.93608 | 2.25795 | 3.39792 | 0.00966 |
| 280 | 2.05262 | 2.18506 | 1.94081 | 2.27002 | 3.39035 | 0.00979 |
| 281 | 2.05594 | 2.19192 | 1.94605 | 2.28231 | 3.38289 | 0.00993 |
| 282 | 2.05962 | 2.19907 | 1.95182 | 2.29479 | 3.37556 | 0.01006 |
| 283 | 2.06367 | 2.20649 | 1.95812 | 2.30742 | 3.36833 | 0.0102 |
| 284 | 2.0681 | 2.21414 | 1.96495 | 2.32018 | 3.36122 | 0.01034 |
| 285 | 2.07291 | 2.22201 | 1.97233 | 2.33303 | 3.35422 | 0.01048 |
| 286 | 2.07813 | 2.23006 | 1.98024 | 2.34594 | 3.34732 | 0.01062 |
| 287 | 2.08374 | 2.23827 | 1.98869 | 2.35888 | 3.34053 | 0.01077 |
| 288 | 2.08977 | 2.24661 | 1.99768 | 2.37182 | 3.33383 | 0.01091 |
| 289 | 2.0962 | 2.25505 | 2.0072 | 2.38474 | 3.32724 | 0.01106 |
| 290 | 2.10305 | 2.26358 | 2.01725 | 2.3976 | 3.32074 | 0.01121 |
| 291 | 2.11031 | 2.27215 | 2.02782 | 2.41037 | 3.31433 | 0.01135 |
| 292 | 2.11798 | 2.28075 | 2.03891 | 2.42303 | 3.30802 | 0.0115 |
| 293 | 2.12607 | 2.28936 | 2.05051 | 2.43555 | 3.30179 | 0.01166 |
| 294 | 2.13456 | 2.29795 | 2.06261 | 2.4479 | 3.29566 | 0.01181 |
| 295 | 2.14346 | 2.30649 | 2.07519 | 2.46005 | 3.28961 | 0.01196 |
| 296 | 2.15276 | 2.31497 | 2.08825 | 2.47199 | 3.28364 | 0.01212 |
| 297 | 2.16245 | 2.32335 | 2.10178 | 2.48369 | 3.27776 | 0.01228 |
| 298 | 2.17254 | 2.33163 | 2.11576 | 2.49511 | 3.27195 | 0.01243 |
| 299 | 2.183 | 2.33977 | 2.13017 | 2.50625 | 3.26623 | 0.01259 |
| 300 | 2.19384 | 2.34776 | 2.14499 | 2.51707 | 3.26058 | 0.01276 |
| 301 | 2.20504 | 2.35557 | 2.16022 | 2.52755 | 3.255 | 0.01292 |
| 302 | 2.21659 | 2.36319 | 2.17583 | 2.53768 | 3.2495 | 0.01308 |
| 303 | 2.22848 | 2.3706 | 2.19181 | 2.54743 | 3.24407 | 0.01325 |
| 304 | 2.24071 | 2.37778 | 2.20812 | 2.55679 | 3.23871 | 0.01342 |
| 305 | 2.25325 | 2.3847 | 2.22476 | 2.56574 | 3.23342 | 0.01358 |
| 306 | 2.2661 | 2.39136 | 2.24169 | 2.57426 | 3.2282 | 0.01375 |
| 307 | 2.27923 | 2.39774 | 2.2589 | 2.58233 | 3.22304 | 0.01393 |
| 308 | 2.29265 | 2.40382 | 2.27635 | 2.58995 | 3.21795 | 0.0141 |
| 309 | 2.30632 | 2.40959 | 2.29403 | 2.5971 | 3.21292 | 0.01427 |
| 310 | 2.32023 | 2.41503 | 2.31191 | 2.60377 | 3.20795 | 0.01445 |
| 311 | 2.33437 | 2.42013 | 2.32995 | 2.60996 | 3.20305 | 0.01463 |
| 312 | 2.34873 | 2.42488 | 2.34815 | 2.61564 | 3.1982 | 0.01481 |
| 313 | 2.36327 | 2.42926 | 2.36646 | 2.62082 | 3.19341 | 0.01499 |
| 314 | 2.37799 | 2.43328 | 2.38485 | 2.6255 | 3.18868 | 0.01517 |
| 315 | 2.39286 | 2.4369 | 2.40331 | 2.62967 | 3.184 | 0.01536 |
| 316 | 2.40787 | 2.44014 | 2.4218 | 2.63333 | 3.17938 | 0.01554 |
| 317 | 2.42299 | 2.44298 | 2.44029 | 2.63648 | 3.17481 | 0.01573 |
| 318 | 2.4382 | 2.44541 | 2.45876 | 2.63913 | 3.1703 | 0.01592 |
| 319 | 2.4535 | 2.44743 | 2.47717 | 2.64127 | 3.16584 | 0.01611 |
| 320 | 2.46884 | 2.44903 | 2.49551 | 2.64293 | 3.16143 | 0.01631 |
| 321 | 2.48422 | 2.45022 | 2.51373 | 2.64409 | 3.15706 | 0.0165 |
| 322 | 2.49961 | 2.45099 | 2.53183 | 2.64479 | 3.15275 | 0.0167 |
| 323 | 2.51499 | 2.45133 | 2.54976 | 2.64502 | 3.14848 | 0.0169 |
| 324 | 2.53035 | 2.45125 | 2.56751 | 2.64481 | 3.14427 | 0.0171 |
| 325 | 2.54565 | 2.45076 | 2.58506 | 2.64416 | 3.14009 | 0.0173 |
| 326 | 2.56088 | 2.44984 | 2.60237 | 2.6431 | 3.13597 | 0.0175 |
| 327 | 2.57602 | 2.44852 | 2.61944 | 2.64164 | 3.13188 | 0.01771 |
| 328 | 2.59104 | 2.44678 | 2.63624 | 2.63981 | 3.12784 | 0.01791 |
| 329 | 2.60593 | 2.44464 | 2.65275 | 2.63762 | 3.12385 | 0.01812 |
| 330 | 2.62067 | 2.44211 | 2.66896 | 2.63509 | 3.11989 | 0.01833 |
| 331 | 2.63524 | 2.43918 | 2.68485 | 2.63225 | 3.11598 | 0.01855 |
| 332 | 2.64962 | 2.43588 | 2.70042 | 2.62913 | 3.1121 | 0.01876 |
| 333 | 2.6638 | 2.43221 | 2.71564 | 2.62574 | 3.10827 | 0.01898 |
| 334 | 2.67774 | 2.42818 | 2.73051 | 2.62212 | 3.10448 | 0.0192 |
| 335 | 2.69145 | 2.42381 | 2.74503 | 2.61827 | 3.10072 | 0.01942 |
| 336 | 2.7049 | 2.4191 | 2.75919 | 2.61425 | 3.097 | 0.01964 |
| 337 | 2.71807 | 2.41407 | 2.77298 | 2.61006 | 3.09332 | 0.01986 |
| 338 | 2.73096 | 2.40874 | 2.7864 | 2.60573 | 3.08967 | 0.02009 |
| 339 | 2.74355 | 2.40312 | 2.79946 | 2.60129 | 3.08606 | 0.02032 |
| 340 | 2.75583 | 2.39722 | 2.81216 | 2.59676 | 3.08249 | 0.02055 |
| 341 | 2.76778 | 2.39106 | 2.8245 | 2.59216 | 3.07894 | 0.02078 |
| 342 | 2.77941 | 2.38466 | 2.83648 | 2.58753 | 3.07544 | 0.02101 |
| 343 | 2.79069 | 2.37804 | 2.84812 | 2.58288 | 3.07196 | 0.02125 |
| 344 | 2.80162 | 2.37121 | 2.85942 | 2.57823 | 3.06852 | 0.02149 |
| 345 | 2.81219 | 2.36418 | 2.87039 | 2.57361 | 3.06511 | 0.02173 |
| 346 | 2.8224 | 2.35699 | 2.88104 | 2.56903 | 3.06173 | 0.02197 |
| 347 | 2.83223 | 2.34964 | 2.89139 | 2.56451 | 3.05838 | 0.02222 |
| 348 | 2.8417 | 2.34215 | 2.90145 | 2.56008 | 3.05507 | 0.02246 |
| 349 | 2.85079 | 2.33454 | 2.91124 | 2.55574 | 3.05178 | 0.02271 |
| 350 | 2.8595 | 2.32683 | 2.92076 | 2.55152 | 3.04852 | 0.02296 |
| 351 | 2.86783 | 2.31903 | 2.93004 | 2.54742 | 3.04529 | 0.02322 |
| 352 | 2.87579 | 2.31117 | 2.9391 | 2.54346 | 3.04209 | 0.02347 |
| 353 | 2.88336 | 2.30326 | 2.94795 | 2.53964 | 3.03892 | 0.02373 |
| 354 | 2.89056 | 2.29531 | 2.9566 | 2.53599 | 3.03577 | 0.02399 |
| 355 | 2.89738 | 2.28735 | 2.96509 | 2.53249 | 3.03265 | 0.02425 |
| 356 | 2.90383 | 2.27939 | 2.97343 | 2.52917 | 3.02956 | 0.02452 |
| 357 | 2.90991 | 2.27144 | 2.98163 | 2.52603 | 3.02649 | 0.02478 |
| 358 | 2.91563 | 2.26352 | 2.98972 | 2.52307 | 3.02345 | 0.02505 |
| 359 | 2.92099 | 2.25565 | 2.99771 | 2.52029 | 3.02044 | 0.02532 |
| 360 | 2.926 | 2.24784 | 3.00563 | 2.51769 | 3.01745 | 0.0256 |
| 361 | 2.93066 | 2.2401 | 3.01349 | 2.51528 | 3.01448 | 0.02587 |
| 362 | 2.93498 | 2.23244 | 3.02131 | 2.51304 | 3.01154 | 0.02615 |
| 363 | 2.93898 | 2.22489 | 3.02912 | 2.51098 | 3.00862 | 0.02643 |
| 364 | 2.94265 | 2.21744 | 3.03692 | 2.5091 | 3.00572 | 0.02672 |
| 365 | 2.946 | 2.21012 | 3.04474 | 2.50738 | 3.00285 | 0.027 |
| 366 | 2.94905 | 2.20292 | 3.05259 | 2.50582 | 3 | 0.02729 |
| 367 | 2.95166 | 2.19595 | 3.06052 | 2.50448 | 2.99718 | 0.02758 |
| 368 | 2.95427 | 2.18898 | 3.06845 | 2.50314 | 2.99436 | 0.02788 |
| 369 | 2.95632 | 2.18232 | 3.07654 | 2.50206 | 2.99159 | 0.02817 |
| 370 | 2.95837 | 2.17567 | 3.08463 | 2.50098 | 2.98881 | 0.02847 |
| 371 | 2.95991 | 2.16937 | 3.09292 | 2.50012 | 2.98608 | 0.02877 |
| 372 | 2.96144 | 2.16308 | 3.10122 | 2.49925 | 2.98334 | 0.02907 |
| 373 | 2.9625 | 2.15716 | 3.10976 | 2.49855 | 2.98065 | 0.02938 |
| 374 | 2.96355 | 2.15124 | 3.11831 | 2.49785 | 2.97796 | 0.02969 |
| 375 | 2.96427 | 2.14563 | 3.12707 | 2.49722 | 2.97529 | 0.03 |
| 376 | 2.96479 | 2.14022 | 3.13598 | 2.49664 | 2.97264 | 0.03032 |
| 377 | 2.9651 | 2.13502 | 3.14506 | 2.49607 | 2.97002 | 0.03063 |
| 378 | 2.96523 | 2.13004 | 3.15429 | 2.49549 | 2.96741 | 0.03095 |
| 379 | 2.96517 | 2.12528 | 3.16369 | 2.49491 | 2.96482 | 0.03128 |
| 380 | 2.96495 | 2.12074 | 3.17326 | 2.49428 | 2.96225 | 0.0316 |
| 381 | 2.96457 | 2.11643 | 3.183 | 2.49361 | 2.95969 | 0.03193 |
| 382 | 2.96404 | 2.11235 | 3.19291 | 2.49286 | 2.95716 | 0.03226 |
| 383 | 2.96337 | 2.10849 | 3.20298 | 2.49203 | 2.95464 | 0.03259 |
| 384 | 2.96257 | 2.10487 | 3.21322 | 2.49109 | 2.95213 | 0.03293 |
| 385 | 2.96165 | 2.10148 | 3.22362 | 2.49003 | 2.94964 | 0.03327 |
| 386 | 2.96061 | 2.09832 | 3.23417 | 2.48883 | 2.94717 | 0.03361 |
| 387 | 2.95948 | 2.0954 | 3.24487 | 2.48746 | 2.94472 | 0.03396 |
| 388 | 2.95825 | 2.09271 | 3.2557 | 2.48593 | 2.94228 | 0.03431 |
| 389 | 2.95689 | 2.09037 | 3.26672 | 2.4841 | 2.93987 | 0.03466 |
| 390 | 2.95553 | 2.08803 | 3.27774 | 2.48228 | 2.93745 | 0.03501 |
| 391 | 2.95404 | 2.08616 | 3.28897 | 2.48001 | 2.93506 | 0.03537 |
| 392 | 2.95255 | 2.08429 | 3.3002 | 2.47775 | 2.93268 | 0.03573 |
| 393 | 2.95094 | 2.08288 | 3.31157 | 2.475 | 2.93032 | 0.0361 |
| 394 | 2.94934 | 2.08146 | 3.32295 | 2.47225 | 2.92797 | 0.03646 |
| 395 | 2.94768 | 2.08039 | 3.3344 | 2.4691 | 2.92563 | 0.03683 |
| 396 | 2.94599 | 2.07955 | 3.34588 | 2.46568 | 2.92331 | 0.03721 |
| 397 | 2.94427 | 2.07893 | 3.35737 | 2.46198 | 2.921 | 0.03758 |
| 398 | 2.94253 | 2.07854 | 3.36884 | 2.45799 | 2.91871 | 0.03796 |
| 399 | 2.94079 | 2.07847 | 3.38026 | 2.45356 | 2.91644 | 0.03835 |
| 400 | 2.93904 | 2.0784 | 3.39168 | 2.44913 | 2.91416 | 0.03873 |
| 401 | 2.93729 | 2.07866 | 3.40301 | 2.44426 | 2.91191 | 0.03912 |
| 402 | 2.93555 | 2.07913 | 3.41424 | 2.43908 | 2.90967 | 0.03952 |
| 403 | 2.93382 | 2.07981 | 3.42536 | 2.43362 | 2.90744 | 0.03991 |
| 404 | 2.93212 | 2.0807 | 3.43636 | 2.42786 | 2.90522 | 0.04031 |
| 405 | 2.93043 | 2.08179 | 3.4472 | 2.42181 | 2.90302 | 0.04072 |
| 406 | 2.92878 | 2.08308 | 3.45788 | 2.41548 | 2.90082 | 0.04112 |
| 407 | 2.92716 | 2.08457 | 3.46836 | 2.40887 | 2.89864 | 0.04154 |
| 408 | 2.92558 | 2.08626 | 3.47864 | 2.402 | 2.89647 | 0.04195 |
| 409 | 2.92405 | 2.08814 | 3.48869 | 2.39487 | 2.89431 | 0.04237 |
| 410 | 2.92257 | 2.09021 | 3.4985 | 2.3875 | 2.89217 | 0.04279 |
| 411 | 2.92114 | 2.09246 | 3.50806 | 2.3799 | 2.89003 | 0.04321 |
| 412 | 2.91977 | 2.09489 | 3.51734 | 2.37208 | 2.88791 | 0.04364 |
| 413 | 2.91846 | 2.09751 | 3.52634 | 2.36406 | 2.88579 | 0.04407 |
| 414 | 2.91721 | 2.1003 | 3.53503 | 2.35585 | 2.88369 | 0.04451 |
| 415 | 2.91604 | 2.10326 | 3.54342 | 2.34747 | 2.8816 | 0.04495 |
| 416 | 2.91494 | 2.10639 | 3.55148 | 2.33894 | 2.87952 | 0.04539 |
| 417 | 2.91391 | 2.10969 | 3.55922 | 2.33028 | 2.87744 | 0.04584 |
| 418 | 2.91297 | 2.11314 | 3.56662 | 2.3215 | 2.87538 | 0.04629 |
| 419 | 2.91211 | 2.11676 | 3.57368 | 2.31263 | 2.87333 | 0.04675 |
| 420 | 2.91133 | 2.12053 | 3.58039 | 2.30367 | 2.87129 | 0.04721 |
| 421 | 2.91065 | 2.12445 | 3.58675 | 2.29466 | 2.86925 | 0.04767 |
| 422 | 2.91006 | 2.12852 | 3.59275 | 2.28561 | 2.86723 | 0.04814 |
| 423 | 2.90956 | 2.13274 | 3.59841 | 2.27654 | 2.86521 | 0.04861 |
| 424 | 2.90916 | 2.13709 | 3.60371 | 2.26747 | 2.86321 | 0.04908 |
| 425 | 2.90886 | 2.14158 | 3.60866 | 2.25841 | 2.86121 | 0.04956 |
| 426 | 2.90866 | 2.14621 | 3.61327 | 2.24939 | 2.85923 | 0.05005 |
| 427 | 2.90857 | 2.15097 | 3.61753 | 2.24042 | 2.85725 | 0.05053 |
| 428 | 2.90858 | 2.15585 | 3.62146 | 2.23152 | 2.85528 | 0.05103 |
| 429 | 2.90871 | 2.16086 | 3.62505 | 2.22271 | 2.85332 | 0.05152 |
| 430 | 2.90894 | 2.16599 | 3.62832 | 2.214 | 2.85136 | 0.05202 |
| 431 | 2.90929 | 2.17123 | 3.63127 | 2.20541 | 2.84942 | 0.05253 |
| 432 | 2.90975 | 2.17659 | 3.63392 | 2.19694 | 2.84748 | 0.05304 |
| 433 | 2.91032 | 2.18206 | 3.63627 | 2.18863 | 2.84555 | 0.05355 |
| 434 | 2.91102 | 2.18764 | 3.63833 | 2.18046 | 2.84363 | 0.05407 |
| 435 | 2.91183 | 2.19332 | 3.64012 | 2.17247 | 2.84172 | 0.05459 |
| 436 | 2.91277 | 2.1991 | 3.64164 | 2.16466 | 2.83981 | 0.05512 |
| 437 | 2.91382 | 2.20497 | 3.64291 | 2.15704 | 2.83791 | 0.05565 |
| 438 | 2.915 | 2.21095 | 3.64393 | 2.14962 | 2.83602 | 0.05618 |
| 439 | 2.91631 | 2.21701 | 3.64473 | 2.1424 | 2.83414 | 0.05673 |
| 440 | 2.91774 | 2.22316 | 3.64531 | 2.1354 | 2.83226 | 0.05727 |
| 441 | 2.91929 | 2.22939 | 3.64568 | 2.12862 | 2.83039 | 0.05782 |
| 442 | 2.92098 | 2.23571 | 3.64586 | 2.12207 | 2.82853 | 0.05838 |
| 443 | 2.92279 | 2.2421 | 3.64586 | 2.11575 | 2.82668 | 0.05894 |
| 444 | 2.92473 | 2.24857 | 3.6457 | 2.10967 | 2.82483 | 0.0595 |
| 445 | 2.9268 | 2.25512 | 3.64538 | 2.10383 | 2.82299 | 0.06007 |
| 446 | 2.92901 | 2.26173 | 3.64492 | 2.09824 | 2.82115 | 0.06065 |
| 447 | 2.93134 | 2.26841 | 3.64433 | 2.09288 | 2.81933 | 0.06123 |
| 448 | 2.93381 | 2.27515 | 3.64362 | 2.08778 | 2.8175 | 0.06181 |
| 449 | 2.93641 | 2.28195 | 3.64281 | 2.08292 | 2.81569 | 0.0624 |
| 450 | 2.93914 | 2.28881 | 3.6419 | 2.07831 | 2.81388 | 0.063 |
| 451 | 2.94201 | 2.29573 | 3.6409 | 2.07395 | 2.81208 | 0.0636 |
| 452 | 2.94502 | 2.3027 | 3.63984 | 2.06984 | 2.81028 | 0.0642 |
| 453 | 2.94815 | 2.30971 | 3.63871 | 2.06597 | 2.80849 | 0.06481 |
| 454 | 2.95143 | 2.31678 | 3.63754 | 2.06235 | 2.8067 | 0.06543 |
| 455 | 2.95484 | 2.32389 | 3.63632 | 2.05897 | 2.80492 | 0.06605 |
| 456 | 2.95838 | 2.33104 | 3.63507 | 2.05583 | 2.80315 | 0.06668 |
| 457 | 2.96206 | 2.33822 | 3.6338 | 2.05293 | 2.80138 | 0.06731 |
| 458 | 2.96588 | 2.34545 | 3.63251 | 2.05026 | 2.79962 | 0.06795 |
| 459 | 2.96983 | 2.35271 | 3.63123 | 2.04783 | 2.79787 | 0.06859 |
| 460 | 2.97393 | 2.36 | 3.62994 | 2.04562 | 2.79611 | 0.06924 |
| 461 | 2.97815 | 2.36732 | 3.62867 | 2.04363 | 2.79437 | 0.06989 |
| 462 | 2.98252 | 2.37466 | 3.62742 | 2.04187 | 2.79263 | 0.07055 |
| 463 | 2.98702 | 2.38203 | 3.6262 | 2.04032 | 2.79089 | 0.07122 |
| 464 | 2.99166 | 2.38941 | 3.62501 | 2.03898 | 2.78916 | 0.07189 |
| 465 | 2.99644 | 2.39682 | 3.62386 | 2.03785 | 2.78744 | 0.07257 |
| 466 | 3.00135 | 2.40424 | 3.62276 | 2.03692 | 2.78572 | 0.07325 |
| 467 | 3.00641 | 2.41168 | 3.62171 | 2.03618 | 2.78401 | 0.07394 |
| 468 | 3.01159 | 2.41913 | 3.62073 | 2.03564 | 2.7823 | 0.07464 |
| 469 | 3.01692 | 2.42659 | 3.6198 | 2.03529 | 2.78059 | 0.07534 |
| 470 | 3.02238 | 2.43405 | 3.61895 | 2.03511 | 2.77889 | 0.07605 |
| 471 | 3.02798 | 2.44152 | 3.61817 | 2.03512 | 2.7772 | 0.07676 |
| 472 | 3.03372 | 2.44899 | 3.61747 | 2.0353 | 2.77551 | 0.07749 |
| 473 | 3.03959 | 2.45646 | 3.61685 | 2.03564 | 2.77382 | 0.07821 |
| 474 | 3.0456 | 2.46393 | 3.61632 | 2.03614 | 2.77214 | 0.07895 |
| 475 | 3.05175 | 2.4714 | 3.61589 | 2.0368 | 2.77046 | 0.07969 |
| 476 | 3.05803 | 2.47885 | 3.61554 | 2.03762 | 2.76879 | 0.08043 |
| 477 | 3.06445 | 2.4863 | 3.61529 | 2.03857 | 2.76712 | 0.08118 |
| 478 | 3.07101 | 2.49374 | 3.61515 | 2.03967 | 2.76546 | 0.08194 |
| 479 | 3.07769 | 2.50117 | 3.61511 | 2.04091 | 2.7638 | 0.08271 |
| 480 | 3.08452 | 2.50857 | 3.61517 | 2.04227 | 2.76214 | 0.08348 |
| 481 | 3.09148 | 2.51597 | 3.61534 | 2.04376 | 2.76049 | 0.08426 |
| 482 | 3.09857 | 2.52334 | 3.61563 | 2.04538 | 2.75885 | 0.08505 |
| 483 | 3.1058 | 2.53069 | 3.61602 | 2.0471 | 2.7572 | 0.08584 |
| 484 | 3.11316 | 2.53802 | 3.61653 | 2.04894 | 2.75557 | 0.08664 |
| 485 | 3.12065 | 2.54532 | 3.61716 | 2.05089 | 2.75393 | 0.08745 |
| 486 | 3.12828 | 2.55259 | 3.6179 | 2.05294 | 2.7523 | 0.08827 |
| 487 | 3.13604 | 2.55983 | 3.61877 | 2.05508 | 2.75068 | 0.08909 |
| 488 | 3.14393 | 2.56704 | 3.61975 | 2.05731 | 2.74905 | 0.08992 |
| 489 | 3.15195 | 2.57422 | 3.62086 | 2.05964 | 2.74744 | 0.09075 |
| 490 | 3.16011 | 2.58136 | 3.62208 | 2.06204 | 2.74582 | 0.0916 |
| 491 | 3.16839 | 2.58846 | 3.62343 | 2.06453 | 2.74421 | 0.09245 |
| 492 | 3.17681 | 2.59553 | 3.62491 | 2.06709 | 2.74261 | 0.09331 |
| 493 | 3.18535 | 2.60255 | 3.62651 | 2.06971 | 2.741 | 0.09417 |
| 494 | 3.19403 | 2.60952 | 3.62823 | 2.07241 | 2.7394 | 0.09505 |
| 495 | 3.20283 | 2.61645 | 3.63008 | 2.07516 | 2.73781 | 0.09593 |
| 496 | 3.21177 | 2.62334 | 3.63205 | 2.07798 | 2.73622 | 0.09682 |
| 497 | 3.22083 | 2.63017 | 3.63415 | 2.08084 | 2.73463 | 0.09771 |
| 498 | 3.23001 | 2.63695 | 3.63637 | 2.08376 | 2.73305 | 0.09862 |
| 499 | 3.23933 | 2.64368 | 3.63872 | 2.08672 | 2.73147 | 0.09953 |
| 500 | 3.24877 | 2.65035 | 3.6412 | 2.08973 | 2.72989 | 0.10045 |
| 501 | 3.25833 | 2.65696 | 3.64379 | 2.09277 | 2.72832 | 0.10138 |
| 502 | 3.26802 | 2.66351 | 3.64652 | 2.09585 | 2.72675 | 0.10232 |
| 503 | 3.27784 | 2.67 | 3.64936 | 2.09896 | 2.72518 | 0.10326 |
| 504 | 3.28772 | 2.6764 | 3.65232 | 2.10208 | 2.72363 | 0.10421 |
| 505 | 3.29784 | 2.68279 | 3.65543 | 2.10525 | 2.72206 | 0.10518 |
| 506 | 3.30802 | 2.68909 | 3.65865 | 2.10844 | 2.7205 | 0.10615 |
| 507 | 3.31832 | 2.69531 | 3.66199 | 2.11164 | 2.71895 | 0.10713 |
| 508 | 3.32875 | 2.70146 | 3.66545 | 2.11485 | 2.7174 | 0.10812 |
| 509 | 3.33929 | 2.70754 | 3.66903 | 2.11808 | 2.71586 | 0.10912 |
| 510 | 3.34995 | 2.71355 | 3.67273 | 2.12131 | 2.71432 | 0.11012 |
| 511 | 3.36074 | 2.71948 | 3.67655 | 2.12455 | 2.71278 | 0.11114 |
| 512 | 3.37164 | 2.72532 | 3.68049 | 2.12779 | 2.71125 | 0.11216 |
| 513 | 3.38265 | 2.73109 | 3.68454 | 2.13103 | 2.70972 | 0.11319 |
| 514 | 3.39378 | 2.73677 | 3.68871 | 2.13427 | 2.70819 | 0.11424 |
| 515 | 3.40503 | 2.74237 | 3.693 | 2.1375 | 2.70667 | 0.11529 |
| 516 | 3.41639 | 2.74788 | 3.6974 | 2.14072 | 2.70515 | 0.11635 |
| 517 | 3.42786 | 2.75331 | 3.70191 | 2.14393 | 2.70363 | 0.11742 |
| 518 | 3.43945 | 2.75864 | 3.70654 | 2.14713 | 2.70212 | 0.1185 |
| 519 | 3.45115 | 2.76388 | 3.71127 | 2.15031 | 2.70061 | 0.11958 |
| 520 | 3.46295 | 2.76902 | 3.71612 | 2.15347 | 2.6991 | 0.12068 |
| 521 | 3.47487 | 2.77407 | 3.72107 | 2.15662 | 2.6976 | 0.12179 |
| 522 | 3.48689 | 2.77902 | 3.72613 | 2.15973 | 2.6961 | 0.12291 |
| 523 | 3.49902 | 2.78387 | 3.7313 | 2.16283 | 2.69461 | 0.12404 |
| 524 | 3.51126 | 2.78862 | 3.73657 | 2.16589 | 2.69311 | 0.12517 |
| 525 | 3.5236 | 2.79326 | 3.74195 | 2.16892 | 2.69163 | 0.12632 |
| 526 | 3.53604 | 2.7978 | 3.74742 | 2.17192 | 2.69014 | 0.12748 |
| 527 | 3.54859 | 2.80223 | 3.753 | 2.17489 | 2.68866 | 0.12865 |
| 528 | 3.56124 | 2.80655 | 3.75868 | 2.17782 | 2.68719 | 0.12983 |
| 529 | 3.57398 | 2.81075 | 3.76445 | 2.18071 | 2.68571 | 0.13101 |
| 530 | 3.58683 | 2.81485 | 3.77033 | 2.18356 | 2.68424 | 0.13221 |
| 531 | 3.59977 | 2.81882 | 3.77629 | 2.18637 | 2.68278 | 0.13342 |
| 532 | 3.61281 | 2.82269 | 3.78235 | 2.18914 | 2.68132 | 0.13464 |
| 533 | 3.62594 | 2.82643 | 3.78851 | 2.19186 | 2.67986 | 0.13587 |
| 534 | 3.63916 | 2.83005 | 3.79475 | 2.19453 | 2.6784 | 0.13712 |
| 535 | 3.65248 | 2.83354 | 3.80108 | 2.19715 | 2.67695 | 0.13837 |
| 536 | 3.66588 | 2.83692 | 3.80751 | 2.19972 | 2.67551 | 0.13963 |
| 537 | 3.67938 | 2.84016 | 3.81401 | 2.20224 | 2.67407 | 0.14091 |
| 538 | 3.69296 | 2.84328 | 3.82061 | 2.2047 | 2.67263 | 0.14219 |
| 539 | 3.70662 | 2.84627 | 3.82728 | 2.20711 | 2.67119 | 0.14349 |
| 540 | 3.72037 | 2.84912 | 3.83404 | 2.20946 | 2.66976 | 0.1448 |
| 541 | 3.7342 | 2.85184 | 3.84088 | 2.21176 | 2.66834 | 0.14612 |
| 542 | 3.74811 | 2.85443 | 3.8478 | 2.21399 | 2.66692 | 0.14745 |
| 543 | 3.76209 | 2.85687 | 3.8548 | 2.21616 | 2.6655 | 0.1488 |
| 544 | 3.77616 | 2.85918 | 3.86187 | 2.21827 | 2.66409 | 0.15015 |
| 545 | 3.79029 | 2.86135 | 3.86901 | 2.22031 | 2.66268 | 0.15152 |
| 546 | 3.8045 | 2.86337 | 3.87623 | 2.22229 | 2.66127 | 0.1529 |
| 547 | 3.81878 | 2.86525 | 3.88352 | 2.2242 | 2.65987 | 0.15429 |
| 548 | 3.83313 | 2.86699 | 3.89088 | 2.22605 | 2.65848 | 0.15569 |
| 549 | 3.84755 | 2.86857 | 3.89831 | 2.22782 | 2.65709 | 0.15711 |
| 550 | 3.86203 | 2.87001 | 3.9058 | 2.22953 | 2.6557 | 0.15854 |
| 551 | 3.87657 | 2.8713 | 3.91336 | 2.23116 | 2.65432 | 0.15998 |
| 552 | 3.89117 | 2.87243 | 3.92098 | 2.23272 | 2.65295 | 0.16143 |
| 553 | 3.90583 | 2.87341 | 3.92867 | 2.23421 | 2.65158 | 0.1629 |
| 554 | 3.92054 | 2.87424 | 3.93641 | 2.23563 | 2.65021 | 0.16437 |
| 555 | 3.93531 | 2.8749 | 3.94421 | 2.23697 | 2.64885 | 0.16587 |
| 556 | 3.95013 | 2.87541 | 3.95207 | 2.23823 | 2.64749 | 0.16737 |
| 557 | 3.965 | 2.87576 | 3.95999 | 2.23942 | 2.64614 | 0.16889 |
| 558 | 3.97991 | 2.87595 | 3.96795 | 2.24053 | 2.6448 | 0.17042 |
| 559 | 3.99487 | 2.87598 | 3.97597 | 2.24156 | 2.64346 | 0.17196 |
| 560 | 4.00986 | 2.87584 | 3.98405 | 2.24251 | 2.64212 | 0.17352 |
| 561 | 4.0249 | 2.87553 | 3.99216 | 2.24338 | 2.64079 | 0.17509 |
| 562 | 4.03997 | 2.87506 | 4.00033 | 2.24417 | 2.63947 | 0.17667 |
| 563 | 4.05508 | 2.87443 | 4.00854 | 2.24487 | 2.63815 | 0.17827 |
| 564 | 4.07022 | 2.87362 | 4.0168 | 2.2455 | 2.63684 | 0.17988 |
| 565 | 4.08538 | 2.87264 | 4.0251 | 2.24604 | 2.63553 | 0.18151 |
| 566 | 4.10057 | 2.87149 | 4.03344 | 2.2465 | 2.63424 | 0.18314 |
| 567 | 4.11579 | 2.87017 | 4.04182 | 2.24688 | 2.63294 | 0.1848 |
| 568 | 4.13102 | 2.86868 | 4.05023 | 2.24717 | 2.63166 | 0.18646 |
| 569 | 4.14627 | 2.86701 | 4.05868 | 2.24737 | 2.63038 | 0.18815 |
| 570 | 4.16153 | 2.86517 | 4.06717 | 2.24749 | 2.6291 | 0.18984 |
| 571 | 4.17681 | 2.86315 | 4.07569 | 2.24753 | 2.62783 | 0.19155 |
| 572 | 4.19209 | 2.86096 | 4.08424 | 2.24747 | 2.62657 | 0.19327 |
| 573 | 4.20738 | 2.85859 | 4.09282 | 2.24733 | 2.62532 | 0.19501 |
| 574 | 4.22267 | 2.85604 | 4.10143 | 2.24711 | 2.62407 | 0.19677 |
| 575 | 4.23789 | 2.85332 | 4.11002 | 2.24679 | 2.62284 | 0.19853 |
| 576 | 4.25324 | 2.85041 | 4.11872 | 2.24639 | 2.6216 | 0.20032 |
| 577 | 4.26852 | 2.84732 | 4.1274 | 2.2459 | 2.62038 | 0.20212 |
| 578 | 4.28378 | 2.84405 | 4.1361 | 2.24532 | 2.61916 | 0.20393 |
| 579 | 4.29904 | 2.84061 | 4.14482 | 2.24465 | 2.61795 | 0.20576 |
| 580 | 4.31427 | 2.83698 | 4.15356 | 2.24389 | 2.61675 | 0.2076 |
| 581 | 4.32949 | 2.83317 | 4.16232 | 2.24305 | 2.61556 | 0.20946 |
| 582 | 4.34468 | 2.82919 | 4.17109 | 2.24211 | 2.61438 | 0.21134 |
| 583 | 4.35985 | 2.82502 | 4.17988 | 2.24109 | 2.6132 | 0.21323 |
| 584 | 4.37499 | 2.82067 | 4.18867 | 2.23997 | 2.61203 | 0.21513 |
| 585 | 4.39009 | 2.81614 | 4.19748 | 2.23877 | 2.61087 | 0.21705 |
| 586 | 4.40516 | 2.81143 | 4.2063 | 2.23748 | 2.60972 | 0.21899 |
| 587 | 4.42019 | 2.80654 | 4.21512 | 2.2361 | 2.60858 | 0.22094 |
| 588 | 4.43517 | 2.80147 | 4.22395 | 2.23462 | 2.60745 | 0.22291 |
| 589 | 4.45011 | 2.79622 | 4.23279 | 2.23306 | 2.60633 | 0.2249 |
| 590 | 4.465 | 2.79079 | 4.24162 | 2.23141 | 2.60521 | 0.2269 |
| 591 | 4.47983 | 2.78518 | 4.25046 | 2.22967 | 2.60411 | 0.22891 |
| 592 | 4.49461 | 2.77939 | 4.2593 | 2.22784 | 2.60302 | 0.23095 |
| 593 | 4.50933 | 2.77342 | 4.26813 | 2.22592 | 2.60194 | 0.233 |
| 594 | 4.52399 | 2.76728 | 4.27697 | 2.22391 | 2.60086 | 0.23506 |
| 595 | 4.53858 | 2.76097 | 4.28579 | 2.22182 | 2.5998 | 0.23714 |
| 596 | 4.5531 | 2.75448 | 4.29461 | 2.21963 | 2.59875 | 0.23924 |
| 597 | 4.56755 | 2.74781 | 4.30343 | 2.21736 | 2.59771 | 0.24136 |
| 598 | 4.58192 | 2.74097 | 4.31223 | 2.215 | 2.59668 | 0.24349 |
| 599 | 4.59621 | 2.73396 | 4.32102 | 2.21255 | 2.59566 | 0.24564 |
| 600 | 4.61041 | 2.72678 | 4.3298 | 2.21001 | 2.59466 | 0.24781 |
| 601 | 4.62454 | 2.71943 | 4.33857 | 2.20739 | 2.59366 | 0.24999 |
| 602 | 4.63857 | 2.71191 | 4.34732 | 2.20468 | 2.59268 | 0.25219 |
| 603 | 4.65251 | 2.70423 | 4.35606 | 2.20188 | 2.59171 | 0.25441 |
| 604 | 4.66635 | 2.69638 | 4.36477 | 2.199 | 2.59075 | 0.25664 |
| 605 | 4.6801 | 2.68837 | 4.37347 | 2.19603 | 2.58981 | 0.25889 |
| 606 | 4.69374 | 2.6802 | 4.38215 | 2.19297 | 2.58888 | 0.26116 |
| 607 | 4.70728 | 2.67187 | 4.39081 | 2.18984 | 2.58796 | 0.26344 |
| 608 | 4.7207 | 2.66338 | 4.39944 | 2.18661 | 2.58705 | 0.26575 |
| 609 | 4.73402 | 2.65473 | 4.40805 | 2.18331 | 2.58616 | 0.26806 |
| 610 | 4.74723 | 2.64594 | 4.41663 | 2.17992 | 2.58529 | 0.2704 |
| 611 | 4.76031 | 2.63699 | 4.42518 | 2.17645 | 2.58442 | 0.27276 |
| 612 | 4.77328 | 2.62789 | 4.43371 | 2.17289 | 2.58357 | 0.27513 |
| 613 | 4.78612 | 2.61864 | 4.44221 | 2.16926 | 2.58274 | 0.27752 |
| 614 | 4.79884 | 2.60925 | 4.45067 | 2.16554 | 2.58192 | 0.27992 |
| 615 | 4.81143 | 2.59972 | 4.45911 | 2.16175 | 2.58112 | 0.28235 |
| 616 | 4.82389 | 2.59005 | 4.46751 | 2.15787 | 2.58033 | 0.28479 |
| 617 | 4.83621 | 2.58024 | 4.47587 | 2.15392 | 2.57956 | 0.28725 |
| 618 | 4.8484 | 2.5703 | 4.4842 | 2.14989 | 2.5788 | 0.28972 |
| 619 | 4.86045 | 2.56022 | 4.49249 | 2.14578 | 2.57807 | 0.29222 |
| 620 | 4.87236 | 2.55002 | 4.50075 | 2.14159 | 2.57734 | 0.29473 |
| 621 | 4.88413 | 2.53969 | 4.50896 | 2.13733 | 2.57664 | 0.29726 |
| 622 | 4.89575 | 2.52923 | 4.51713 | 2.133 | 2.57595 | 0.2998 |
| 623 | 4.90722 | 2.51866 | 4.52527 | 2.12859 | 2.57528 | 0.30237 |
| 624 | 4.91854 | 2.50796 | 4.53336 | 2.1241 | 2.57463 | 0.30495 |
| 625 | 4.92971 | 2.49716 | 4.5414 | 2.11954 | 2.574 | 0.30755 |
| 626 | 4.94073 | 2.48624 | 4.5494 | 2.11492 | 2.57338 | 0.31016 |
| 627 | 4.95159 | 2.47521 | 4.55736 | 2.11022 | 2.57278 | 0.3128 |
| 628 | 4.96229 | 2.46408 | 4.56527 | 2.10545 | 2.57221 | 0.31545 |
| 629 | 4.97283 | 2.45284 | 4.57313 | 2.10061 | 2.57165 | 0.31812 |
| 630 | 4.98321 | 2.44151 | 4.58094 | 2.0957 | 2.57111 | 0.3208 |
| 631 | 4.99343 | 2.43008 | 4.5887 | 2.09072 | 2.5706 | 0.3235 |
| 632 | 5.00349 | 2.41855 | 4.59642 | 2.08568 | 2.5701 | 0.32622 |
| 633 | 5.01338 | 2.40694 | 4.60408 | 2.08058 | 2.56962 | 0.32896 |
| 634 | 5.0231 | 2.39524 | 4.61168 | 2.0754 | 2.56917 | 0.33171 |
| 635 | 5.03265 | 2.38346 | 4.61924 | 2.07017 | 2.56874 | 0.33448 |
| 636 | 5.04204 | 2.3716 | 4.62674 | 2.06487 | 2.56832 | 0.33727 |
| 637 | 5.05125 | 2.35967 | 4.63418 | 2.05951 | 2.56794 | 0.34007 |
| 638 | 5.06029 | 2.34766 | 4.64157 | 2.05409 | 2.56757 | 0.34289 |
| 639 | 5.06916 | 2.33559 | 4.64891 | 2.04861 | 2.56723 | 0.34573 |
| 640 | 5.07786 | 2.32345 | 4.65618 | 2.04307 | 2.56691 | 0.34859 |
| 641 | 5.08638 | 2.31124 | 4.6634 | 2.03748 | 2.56661 | 0.35146 |
| 642 | 5.09472 | 2.29898 | 4.67056 | 2.03182 | 2.56634 | 0.35434 |
| 643 | 5.1029 | 2.28667 | 4.67766 | 2.02611 | 2.56609 | 0.35724 |
| 644 | 5.11089 | 2.2743 | 4.6847 | 2.02035 | 2.56587 | 0.36016 |
| 645 | 5.11871 | 2.26188 | 4.69167 | 2.01453 | 2.56567 | 0.36309 |
| 646 | 5.12636 | 2.24943 | 4.69859 | 2.00866 | 2.5655 | 0.36604 |
| 647 | 5.13382 | 2.23693 | 4.70544 | 2.00274 | 2.56535 | 0.36901 |
| 648 | 5.14111 | 2.22439 | 4.71224 | 1.99677 | 2.56523 | 0.37199 |
| 649 | 5.14822 | 2.21182 | 4.71896 | 1.99075 | 2.56514 | 0.37498 |
| 650 | 5.15516 | 2.19922 | 4.72563 | 1.98469 | 2.56507 | 0.37799 |
| 651 | 5.16192 | 2.18659 | 4.73223 | 1.97857 | 2.56504 | 0.38102 |
| 652 | 5.1685 | 2.17394 | 4.73876 | 1.97241 | 2.56502 | 0.38406 |
| 653 | 5.17491 | 2.16127 | 4.74523 | 1.9662 | 2.56504 | 0.38711 |
| 654 | 5.18114 | 2.14858 | 4.75164 | 1.95995 | 2.56509 | 0.39018 |
| 655 | 5.18719 | 2.13588 | 4.75797 | 1.95366 | 2.56516 | 0.39326 |
| 656 | 5.19307 | 2.12317 | 4.76424 | 1.94733 | 2.56527 | 0.39635 |
| 657 | 5.19878 | 2.11045 | 4.77045 | 1.94095 | 2.5654 | 0.39946 |
| 658 | 5.20431 | 2.09773 | 4.77658 | 1.93454 | 2.56556 | 0.40258 |
| 659 | 5.20967 | 2.08501 | 4.78265 | 1.92809 | 2.56576 | 0.40572 |
| 660 | 5.21486 | 2.07229 | 4.78865 | 1.9216 | 2.56598 | 0.40886 |
| 661 | 5.21987 | 2.05958 | 4.79458 | 1.91508 | 2.56624 | 0.41202 |
| 662 | 5.22472 | 2.04687 | 4.80045 | 1.90852 | 2.56652 | 0.41519 |
| 663 | 5.22939 | 2.03418 | 4.80624 | 1.90193 | 2.56684 | 0.41838 |
| 664 | 5.2339 | 2.02151 | 4.81196 | 1.8953 | 2.5672 | 0.42157 |
| 665 | 5.23824 | 2.00885 | 4.81762 | 1.88865 | 2.56758 | 0.42478 |
| 666 | 5.24242 | 1.99622 | 4.8232 | 1.88196 | 2.568 | 0.42799 |
| 667 | 5.24643 | 1.98361 | 4.82872 | 1.87525 | 2.56845 | 0.43122 |
| 668 | 5.25027 | 1.97103 | 4.83416 | 1.8685 | 2.56893 | 0.43445 |
| 669 | 5.25396 | 1.95848 | 4.83954 | 1.86174 | 2.56945 | 0.4377 |
| 670 | 5.25748 | 1.94596 | 4.84484 | 1.85494 | 2.57 | 0.44096 |
| 671 | 5.26085 | 1.93348 | 4.85008 | 1.84812 | 2.57059 | 0.44422 |
| 672 | 5.26406 | 1.92104 | 4.85524 | 1.84128 | 2.57121 | 0.44749 |
| 673 | 5.26711 | 1.90864 | 4.86033 | 1.83441 | 2.57187 | 0.45077 |
| 674 | 5.27001 | 1.89628 | 4.86535 | 1.82752 | 2.57257 | 0.45406 |
| 675 | 5.27275 | 1.88397 | 4.8703 | 1.82062 | 2.5733 | 0.45736 |
| 676 | 5.27535 | 1.8717 | 4.87518 | 1.81369 | 2.57406 | 0.46066 |
| 677 | 5.2778 | 1.85949 | 4.87999 | 1.80675 | 2.57487 | 0.46397 |
| 678 | 5.2801 | 1.84734 | 4.88473 | 1.79979 | 2.57571 | 0.46728 |
| 679 | 5.28225 | 1.83524 | 4.8894 | 1.79281 | 2.57659 | 0.4706 |
| 680 | 5.28427 | 1.82319 | 4.894 | 1.78582 | 2.5775 | 0.47393 |
| 681 | 5.28614 | 1.81121 | 4.89853 | 1.77882 | 2.57846 | 0.47726 |
| 682 | 5.28787 | 1.79929 | 4.90298 | 1.7718 | 2.57945 | 0.48059 |
| 683 | 5.28947 | 1.78744 | 4.90737 | 1.76477 | 2.58048 | 0.48393 |
| 684 | 5.29093 | 1.77565 | 4.91168 | 1.75773 | 2.58155 | 0.48727 |
| 685 | 5.29226 | 1.76393 | 4.91593 | 1.75068 | 2.58266 | 0.49061 |
| 686 | 5.29345 | 1.75228 | 4.92011 | 1.74363 | 2.58381 | 0.49396 |
| 687 | 5.29452 | 1.74071 | 4.92421 | 1.73657 | 2.585 | 0.4973 |
| 688 | 5.29546 | 1.72921 | 4.92825 | 1.7295 | 2.58623 | 0.50065 |
| 689 | 5.29628 | 1.71778 | 4.93222 | 1.72242 | 2.5875 | 0.504 |
| 690 | 5.29698 | 1.70644 | 4.93612 | 1.71534 | 2.58881 | 0.50734 |
| 691 | 5.29755 | 1.69517 | 4.93995 | 1.70826 | 2.59016 | 0.51069 |
| 692 | 5.29801 | 1.68398 | 4.94371 | 1.70118 | 2.59155 | 0.51404 |
| 693 | 5.29836 | 1.67288 | 4.9474 | 1.69409 | 2.59298 | 0.51738 |
| 694 | 5.29859 | 1.66186 | 4.95103 | 1.68701 | 2.59445 | 0.52072 |
| 695 | 5.29871 | 1.65093 | 4.95459 | 1.67992 | 2.59597 | 0.52406 |
| 696 | 5.29872 | 1.64008 | 4.95808 | 1.67284 | 2.59753 | 0.52739 |
| 697 | 5.29863 | 1.62932 | 4.96151 | 1.66576 | 2.59913 | 0.53072 |
| 698 | 5.29843 | 1.61866 | 4.96486 | 1.65869 | 2.60077 | 0.53404 |
| 699 | 5.29813 | 1.60808 | 4.96816 | 1.65161 | 2.60245 | 0.53736 |
| 700 | 5.29774 | 1.59759 | 4.97138 | 1.64455 | 2.60418 | 0.54067 |
| 701 | 5.29725 | 1.5872 | 4.97455 | 1.63749 | 2.60594 | 0.54398 |
| 702 | 5.29666 | 1.5769 | 4.97764 | 1.63044 | 2.60776 | 0.54727 |
| 703 | 5.29598 | 1.56669 | 4.98067 | 1.6234 | 2.60961 | 0.55056 |
| 704 | 5.29522 | 1.55658 | 4.98364 | 1.61636 | 2.6115 | 0.55384 |
| 705 | 5.29436 | 1.54657 | 4.98655 | 1.60934 | 2.61344 | 0.55711 |
| 706 | 5.29343 | 1.53665 | 4.98939 | 1.60233 | 2.61543 | 0.56037 |
| 707 | 5.29241 | 1.52683 | 4.99217 | 1.59532 | 2.61745 | 0.56362 |
| 708 | 5.29131 | 1.51711 | 4.99489 | 1.58834 | 2.61952 | 0.56685 |
| 709 | 5.29014 | 1.50749 | 4.99755 | 1.58136 | 2.62163 | 0.57007 |
| 710 | 5.28889 | 1.49797 | 5.00014 | 1.5744 | 2.62378 | 0.57328 |
| 711 | 5.28757 | 1.48855 | 5.00268 | 1.56746 | 2.62598 | 0.57648 |
| 712 | 5.28617 | 1.47923 | 5.00516 | 1.56053 | 2.62822 | 0.57966 |
| 713 | 5.28472 | 1.47001 | 5.00758 | 1.55362 | 2.6305 | 0.58283 |
| 714 | 5.28319 | 1.46089 | 5.00994 | 1.54672 | 2.63283 | 0.58598 |
| 715 | 5.28161 | 1.45188 | 5.01224 | 1.53984 | 2.63519 | 0.58911 |
| 716 | 5.27996 | 1.44296 | 5.01448 | 1.53299 | 2.6376 | 0.59222 |
| 717 | 5.27826 | 1.43415 | 5.01667 | 1.52615 | 2.64006 | 0.59532 |
| 718 | 5.2765 | 1.42544 | 5.01881 | 1.51933 | 2.64255 | 0.5984 |
| 719 | 5.27469 | 1.41683 | 5.02088 | 1.51254 | 2.64509 | 0.60145 |
| 720 | 5.27282 | 1.40833 | 5.02291 | 1.50576 | 2.64767 | 0.60449 |
| 721 | 5.27091 | 1.39993 | 5.02488 | 1.49901 | 2.65029 | 0.60751 |
| 722 | 5.26896 | 1.39163 | 5.0268 | 1.49228 | 2.65295 | 0.6105 |
| 723 | 5.26695 | 1.38343 | 5.02867 | 1.48557 | 2.65566 | 0.61347 |
| 724 | 5.26491 | 1.37533 | 5.03048 | 1.47889 | 2.6584 | 0.61642 |
| 725 | 5.26283 | 1.36734 | 5.03225 | 1.47223 | 2.66119 | 0.61934 |
| 726 | 5.26071 | 1.35945 | 5.03396 | 1.46559 | 2.66402 | 0.62224 |
| 727 | 5.25856 | 1.35166 | 5.03562 | 1.45898 | 2.66689 | 0.62511 |
| 728 | 5.25637 | 1.34397 | 5.03723 | 1.4524 | 2.6698 | 0.62795 |
| 729 | 5.25416 | 1.33638 | 5.0388 | 1.44585 | 2.67275 | 0.63077 |
| 730 | 5.25191 | 1.32889 | 5.04031 | 1.43932 | 2.67573 | 0.63356 |
| 731 | 5.24964 | 1.32151 | 5.04178 | 1.43282 | 2.67876 | 0.63632 |
| 732 | 5.24735 | 1.31422 | 5.04321 | 1.42634 | 2.68183 | 0.63906 |
| 733 | 5.24503 | 1.30703 | 5.04459 | 1.4199 | 2.68493 | 0.64176 |
| 734 | 5.2427 | 1.29993 | 5.04592 | 1.41349 | 2.68808 | 0.64443 |
| 735 | 5.24034 | 1.29294 | 5.04721 | 1.40711 | 2.69126 | 0.64707 |
| 736 | 5.23798 | 1.28604 | 5.04845 | 1.40075 | 2.69448 | 0.64967 |
| 737 | 5.23559 | 1.27924 | 5.04966 | 1.39443 | 2.69773 | 0.65225 |
| 738 | 5.2332 | 1.27254 | 5.05082 | 1.38815 | 2.70102 | 0.65479 |
| 739 | 5.2308 | 1.26593 | 5.05194 | 1.38189 | 2.70435 | 0.65729 |
| 740 | 5.22839 | 1.25941 | 5.05302 | 1.37566 | 2.70772 | 0.65977 |
| 741 | 5.22597 | 1.25299 | 5.05406 | 1.36947 | 2.71111 | 0.6622 |
| 742 | 5.22355 | 1.24666 | 5.05507 | 1.36332 | 2.71455 | 0.6646 |
| 743 | 5.22113 | 1.24041 | 5.05603 | 1.35719 | 2.71801 | 0.66696 |
| 744 | 5.21871 | 1.23426 | 5.05697 | 1.3511 | 2.72152 | 0.66929 |
| 745 | 5.21628 | 1.2282 | 5.05786 | 1.34505 | 2.72505 | 0.67158 |
| 746 | 5.21387 | 1.22223 | 5.05872 | 1.33903 | 2.72861 | 0.67382 |
| 747 | 5.21146 | 1.21634 | 5.05955 | 1.33304 | 2.73221 | 0.67603 |
| 748 | 5.20905 | 1.21054 | 5.06034 | 1.32709 | 2.73584 | 0.6782 |
| 749 | 5.20665 | 1.20483 | 5.06111 | 1.32118 | 2.7395 | 0.68033 |
| 750 | 5.20427 | 1.1992 | 5.06184 | 1.3153 | 2.74319 | 0.68242 |
| 751 | 5.20189 | 1.19365 | 5.06254 | 1.30946 | 2.7469 | 0.68446 |
| 752 | 5.19953 | 1.18818 | 5.06322 | 1.30365 | 2.75065 | 0.68646 |
| 753 | 5.19718 | 1.18279 | 5.06387 | 1.29788 | 2.75442 | 0.68843 |
| 754 | 5.19485 | 1.17748 | 5.06449 | 1.29215 | 2.75822 | 0.69034 |
| 755 | 5.19254 | 1.17225 | 5.06508 | 1.28645 | 2.76205 | 0.69222 |
| 756 | 5.19025 | 1.16709 | 5.06565 | 1.28079 | 2.76591 | 0.69405 |
| 757 | 5.18798 | 1.162 | 5.06619 | 1.27517 | 2.76978 | 0.69583 |
| 758 | 5.18573 | 1.15699 | 5.06672 | 1.26959 | 2.77369 | 0.69757 |
| 759 | 5.1835 | 1.15206 | 5.06722 | 1.26404 | 2.77761 | 0.69926 |
| 760 | 5.1813 | 1.14719 | 5.0677 | 1.25853 | 2.78156 | 0.70091 |
| 761 | 5.17912 | 1.14239 | 5.06816 | 1.25305 | 2.78553 | 0.70251 |
| 762 | 5.17697 | 1.13765 | 5.0686 | 1.24762 | 2.78952 | 0.70407 |
| 763 | 5.17485 | 1.13298 | 5.06903 | 1.24222 | 2.79354 | 0.70558 |
| 764 | 5.17275 | 1.12838 | 5.06944 | 1.23685 | 2.79757 | 0.70704 |
| 765 | 5.17069 | 1.12384 | 5.06983 | 1.23152 | 2.80162 | 0.70845 |
| 766 | 5.16866 | 1.11937 | 5.07021 | 1.22625 | 2.80568 | 0.70981 |
| 767 | 5.16665 | 1.11493 | 5.07057 | 1.22098 | 2.80977 | 0.71113 |
| 768 | 5.16469 | 1.11057 | 5.07092 | 1.21576 | 2.81388 | 0.7124 |
| 769 | 5.16275 | 1.10626 | 5.07126 | 1.21058 | 2.818 | 0.71362 |
| 770 | 5.16085 | 1.102 | 5.07159 | 1.20543 | 2.82213 | 0.71479 |
| 771 | 5.15899 | 1.0978 | 5.07192 | 1.20032 | 2.82628 | 0.7159 |
| 772 | 5.15716 | 1.09365 | 5.07223 | 1.19524 | 2.83044 | 0.71698 |
| 773 | 5.15537 | 1.08955 | 5.07253 | 1.19019 | 2.83461 | 0.718 |
| 774 | 5.15361 | 1.08549 | 5.07283 | 1.18518 | 2.83879 | 0.71897 |
| 775 | 5.1519 | 1.08148 | 5.07313 | 1.18021 | 2.84299 | 0.71989 |
| 776 | 5.15022 | 1.07751 | 5.07342 | 1.17526 | 2.84719 | 0.72075 |
| 777 | 5.14858 | 1.07359 | 5.0737 | 1.17035 | 2.8514 | 0.72157 |
| 778 | 5.14698 | 1.0697 | 5.07399 | 1.16547 | 2.85562 | 0.72234 |
| 779 | 5.14542 | 1.06586 | 5.07427 | 1.16062 | 2.85985 | 0.72306 |
| 780 | 5.14389 | 1.06205 | 5.07455 | 1.15581 | 2.86408 | 0.72373 |
| 781 | 5.14241 | 1.05827 | 5.07483 | 1.15102 | 2.86832 | 0.72435 |
| 782 | 5.14097 | 1.05453 | 5.07512 | 1.14626 | 2.87257 | 0.72491 |
| 783 | 5.13957 | 1.05082 | 5.0754 | 1.14153 | 2.87681 | 0.72543 |
| 784 | 5.13821 | 1.04714 | 5.07569 | 1.13682 | 2.88106 | 0.72589 |
| 785 | 5.13689 | 1.04349 | 5.07598 | 1.13215 | 2.88532 | 0.7263 |
| 786 | 5.13561 | 1.03986 | 5.07628 | 1.1275 | 2.88957 | 0.72667 |
| 787 | 5.13437 | 1.03626 | 5.07658 | 1.12287 | 2.89382 | 0.72698 |
| 788 | 5.13317 | 1.03269 | 5.07689 | 1.11827 | 2.89807 | 0.72724 |
| 789 | 5.13201 | 1.02913 | 5.07721 | 1.11369 | 2.90233 | 0.72746 |
| 790 | 5.1309 | 1.02559 | 5.07753 | 1.10913 | 2.90657 | 0.72762 |
| 791 | 5.12982 | 1.02208 | 5.07786 | 1.1046 | 2.91082 | 0.72773 |
| 792 | 5.12878 | 1.01857 | 5.0782 | 1.10008 | 2.91506 | 0.72779 |
| 793 | 5.12778 | 1.01509 | 5.07855 | 1.09558 | 2.9193 | 0.7278 |
| 794 | 5.12681 | 1.01161 | 5.07891 | 1.0911 | 2.92353 | 0.72776 |
| 795 | 5.12589 | 1.00815 | 5.07928 | 1.08664 | 2.92775 | 0.72768 |
| 796 | 5.12501 | 1.0047 | 5.07966 | 1.0822 | 2.93197 | 0.72754 |
| 797 | 5.12416 | 1.00125 | 5.08005 | 1.07776 | 2.93618 | 0.72736 |
| 798 | 5.12335 | 0.99783 | 5.08045 | 1.07336 | 2.94037 | 0.72713 |
| 799 | 5.12257 | 0.99439 | 5.08086 | 1.06894 | 2.94457 | 0.72684 |
| 800 | 5.12183 | 0.99096 | 5.08129 | 1.06454 | 2.94875 | 0.72651 |
| 810 | 5.1162 | 0.95664 | 5.08622 | 1.02088 | 2.98982 | 0.72066 |
| 820 | 5.11314 | 0.92143 | 5.09218 | 0.97689 | 3.02907 | 0.71044 |
| 830 | 5.11151 | 0.88455 | 5.09844 | 0.93147 | 3.06594 | 0.69636 |
| 840 | 5.1101 | 0.84567 | 5.10383 | 0.88397 | 3.09997 | 0.67901 |
| 850 | 5.10778 | 0.80488 | 5.10701 | 0.8344 | 3.13089 | 0.659 |
| 860 | 5.10358 | 0.76262 | 5.1068 | 0.78337 | 3.15853 | 0.63694 |
| 870 | 5.09684 | 0.71953 | 5.1025 | 0.73192 | 3.18287 | 0.61343 |
| 880 | 5.08717 | 0.67639 | 5.09392 | 0.68119 | 3.20397 | 0.589 |
| 890 | 5.07447 | 0.63397 | 5.08132 | 0.63224 | 3.22198 | 0.56411 |
| 900 | 5.05881 | 0.59294 | 5.06522 | 0.58574 | 3.23712 | 0.53912 |
| 910 | 5.0405 | 0.55392 | 5.04628 | 0.54226 | 3.2496 | 0.5144 |
| 920 | 5.01991 | 0.51735 | 5.02516 | 0.50199 | 3.25968 | 0.49017 |
| 930 | 4.99747 | 0.48357 | 5.00244 | 0.46501 | 3.26761 | 0.46664 |
| 940 | 4.97366 | 0.4528 | 4.97861 | 0.43125 | 3.27365 | 0.44394 |
| 950 | 4.94893 | 0.42514 | 4.95408 | 0.4006 | 3.27803 | 0.42215 |
| 960 | 4.92376 | 0.40066 | 4.92914 | 0.37291 | 3.28097 | 0.40135 |
| 970 | 4.89868 | 0.37935 | 4.90406 | 0.34805 | 3.28267 | 0.38155 |
| 980 | 4.87445 | 0.36076 | 4.87902 | 0.3259 | 3.28331 | 0.36277 |
| 990 | 4.85079 | 0.34417 | 4.8542 | 0.30635 | 3.28305 | 0.34498 |
| 1000 | 4.8275 | 0.32968 | 4.82973 | 0.28936 | 3.28203 | 0.32816 |
| 1010 | 4.8046 | 0.3174 | 4.80576 | 0.27491 | 3.28038 | 0.31229 |
| 1020 | 4.78215 | 0.30751 | 4.78248 | 0.26304 | 3.27819 | 0.29732 |
| 1030 | 4.76031 | 0.30023 | 4.76014 | 0.25385 | 3.27557 | 0.28321 |
| 1040 | 4.73936 | 0.29592 | 4.73909 | 0.2475 | 3.27259 | 0.26991 |
| 1050 | 4.71979 | 0.29503 | 4.71992 | 0.24417 | 3.26933 | 0.25738 |
| 1060 | 4.70248 | 0.29816 | 4.70354 | 0.24398 | 3.26583 | 0.24557 |
| 1070 | 4.68905 | 0.30593 | 4.69137 | 0.24681 | 3.26215 | 0.23444 |
| 1080 | 4.68238 | 0.31839 | 4.68547 | 0.2517 | 3.25834 | 0.22395 |
| 1090 | 4.68688 | 0.3337 | 4.68814 | 0.25596 | 3.25442 | 0.21405 |
| 1100 | 4.70717 | 0.34533 | 4.7002 | 0.25416 | 3.25043 | 0.20472 |
| 1110 | 4.742 | 0.34073 | 4.71758 | 0.23948 | 3.2464 | 0.1959 |
| 1120 | 4.77697 | 0.30979 | 4.73023 | 0.20953 | 3.24234 | 0.18757 |
| 1130 | 4.79288 | 0.25952 | 4.72904 | 0.17124 | 3.23827 | 0.1797 |
| 1140 | 4.78523 | 0.20842 | 4.71363 | 0.13517 | 3.23421 | 0.17225 |
| 1150 | 4.76304 | 0.1678 | 4.68993 | 0.10717 | 3.23017 | 0.16519 |
| 1160 | 4.73573 | 0.13878 | 4.66373 | 0.0876 | 3.22617 | 0.15851 |
| 1170 | 4.70838 | 0.11858 | 4.63834 | 0.07452 | 3.2222 | 0.15218 |
| 1180 | 4.68289 | 0.1043 | 4.61507 | 0.06584 | 3.21828 | 0.14617 |
| 1190 | 4.65972 | 0.09386 | 4.5942 | 0.05996 | 3.21441 | 0.14047 |
| 1200 | 4.63875 | 0.08593 | 4.57561 | 0.05582 | 3.2106 | 0.13505 |
| 1210 | 4.61973 | 0.07966 | 4.55903 | 0.05274 | 3.20685 | 0.12989 |
| 1220 | 4.60238 | 0.07455 | 4.54427 | 0.05026 | 3.20316 | 0.12499 |
| 1230 | 4.58646 | 0.07025 | 4.531 | 0.04788 | 3.19954 | 0.12032 |
| 1240 | 4.57182 | 0.06656 | 4.51888 | 0.04543 | 3.19598 | 0.11587 |
| 1250 | 4.55834 | 0.0632 | 4.50752 | 0.04278 | 3.19249 | 0.11163 |
| 1260 | 4.54573 | 0.06002 | 4.49667 | 0.04002 | 3.18906 | 0.10758 |
| 1270 | 4.53383 | 0.057 | 4.48621 | 0.03725 | 3.1857 | 0.10372 |
| 1280 | 4.52254 | 0.05414 | 4.47605 | 0.03453 | 3.18241 | 0.10003 |
| 1290 | 4.51177 | 0.05143 | 4.46617 | 0.03193 | 3.17918 | 0.0965 |
| 1300 | 4.50148 | 0.04886 | 4.45657 | 0.02948 | 3.17603 | 0.09312 |
| 1310 | 4.49162 | 0.04641 | 4.44723 | 0.02718 | 3.17293 | 0.08989 |
| 1320 | 4.48215 | 0.04409 | 4.43816 | 0.02506 | 3.1699 | 0.08679 |
| 1330 | 4.47303 | 0.04189 | 4.42936 | 0.02311 | 3.16693 | 0.08383 |
| 1340 | 4.46425 | 0.03979 | 4.42083 | 0.02133 | 3.16403 | 0.08098 |
| 1350 | 4.45578 | 0.0378 | 4.41256 | 0.01969 | 3.16118 | 0.07825 |
| 1360 | 4.4476 | 0.0359 | 4.40457 | 0.0182 | 3.1584 | 0.07563 |
| 1370 | 4.43969 | 0.03409 | 4.39683 | 0.01683 | 3.15567 | 0.07311 |
| 1380 | 4.43203 | 0.03237 | 4.38934 | 0.01558 | 3.153 | 0.0707 |
| 1390 | 4.42462 | 0.03073 | 4.3821 | 0.01444 | 3.15039 | 0.06837 |
| 1400 | 4.41743 | 0.02917 | 4.37509 | 0.01339 | 3.14783 | 0.06613 |
| 1410 | 4.41046 | 0.02768 | 4.36831 | 0.01243 | 3.14532 | 0.06398 |
| 1420 | 4.4037 | 0.02626 | 4.36175 | 0.01154 | 3.14287 | 0.06191 |
| 1430 | 4.39713 | 0.0249 | 4.3554 | 0.01072 | 3.14046 | 0.05991 |
| 1440 | 4.39075 | 0.02361 | 4.34925 | 0.00997 | 3.13811 | 0.05799 |
| 1450 | 4.38455 | 0.02237 | 4.34328 | 0.00927 | 3.1358 | 0.05614 |
| 1460 | 4.37852 | 0.0212 | 4.33751 | 0.00862 | 3.13354 | 0.05435 |
| 1470 | 4.37265 | 0.02007 | 4.3319 | 0.00802 | 3.13133 | 0.05262 |
| 1480 | 4.36694 | 0.019 | 4.32647 | 0.00746 | 3.12916 | 0.05096 |
| 1490 | 4.36138 | 0.01798 | 4.3212 | 0.00694 | 3.12703 | 0.04935 |
| 1500 | 4.35596 | 0.017 | 4.31608 | 0.00646 | 3.12495 | 0.0478 |
| 1510 | 4.35068 | 0.01606 | 4.3111 | 0.00601 | 3.1229 | 0.0463 |
| 1520 | 4.34554 | 0.01517 | 4.30627 | 0.00558 | 3.1209 | 0.04485 |
| 1530 | 4.34052 | 0.01432 | 4.30157 | 0.00519 | 3.11894 | 0.04344 |
| 1540 | 4.33563 | 0.0135 | 4.297 | 0.00482 | 3.11701 | 0.04209 |
| 1550 | 4.33085 | 0.01273 | 4.29256 | 0.00447 | 3.11512 | 0.04078 |
| 1560 | 4.32619 | 0.01198 | 4.28823 | 0.00414 | 3.11327 | 0.03951 |
| 1570 | 4.32164 | 0.01128 | 4.28402 | 0.00384 | 3.11145 | 0.03828 |
| 1580 | 4.3172 | 0.0106 | 4.27992 | 0.00355 | 3.10966 | 0.03709 |
| 1590 | 4.31286 | 0.00995 | 4.27592 | 0.00328 | 3.10791 | 0.03594 |
| 1600 | 4.30862 | 0.00934 | 4.27203 | 0.00303 | 3.10619 | 0.03482 |
| 1610 | 4.30448 | 0.00875 | 4.26823 | 0.0028 | 3.1045 | 0.03374 |
| 1620 | 4.30043 | 0.00819 | 4.26453 | 0.00257 | 3.10285 | 0.03269 |
| 1630 | 4.29647 | 0.00766 | 4.26092 | 0.00237 | 3.10122 | 0.03167 |
| 1640 | 4.29259 | 0.00715 | 4.2574 | 0.00217 | 3.09962 | 0.03069 |
| 1650 | 4.28881 | 0.00667 | 4.25396 | 0.00199 | 3.09805 | 0.02973 |
| 1660 | 4.2851 | 0.00621 | 4.2506 | 0.00182 | 3.09651 | 0.0288 |
| 1670 | 4.28148 | 0.00577 | 4.24732 | 0.00166 | 3.095 | 0.0279 |
| 1680 | 4.27793 | 0.00535 | 4.24412 | 0.00151 | 3.09351 | 0.02703 |
| 1690 | 4.27446 | 0.00496 | 4.24099 | 0.00137 | 3.09205 | 0.02618 |
| 1700 | 4.27106 | 0.00459 | 4.23794 | 0.00124 | 3.09061 | 0.02536 |
| 1800 | 4.2407 | 0.00181 | 4.21084 | 3.90424E-4 | 3.07749 | 0.01833 |
| 1900 | 4.21585 | 4.22917E-4 | 4.189 | 1.14153E-4 | 3.06631 | 0.01303 |
| 2000 | 4.19544 | 3.59609E-5 | 4.17112 | 3.71743E-5 | 3.05669 | 0.00903 |
| 2100 | 4.1788 | 4.17942E-5 | 4.15625 | 4.20212E-5 | 3.04835 | 0.00602 |
| 2200 | 4.16488 | 4.82132E-5 | 4.14368 | 4.84601E-5 | 3.04107 | 0.00379 |
| 2300 | 4.15303 | 5.52472E-5 | 4.13292 | 5.55163E-5 | 3.03469 | 0.00218 |
| 2400 | 4.14281 | 6.29247E-5 | 4.1236 | 6.32181E-5 | 3.02909 | 0.00107 |
| 2500 | 4.1339 | 7.12741E-5 | 4.11546 | 7.15939E-5 | 3.02418 | 3.84623E-4 |
| 2600 | 4.12608 | 8.03238E-5 | 4.10829 | 8.06721E-5 | 3.01992 | 5.22851E-5 |
| 2700 | 4.11915 | 9.0102E-5 | 4.10192 | 9.0481E-5 | 3.01631 | 0 |
| 2800 | 4.11297 | 1.00637E-4 | 4.09623 | 1.01049E-4 | 3.0133 | 0 |
| 2900 | 4.10742 | 1.11957E-4 | 4.09111 | 1.12404E-4 | 3.0107 | 0 |
| 3000 | 4.10241 | 1.24091E-4 | 4.08648 | 1.24576E-4 | 3.00844 | 0 |
| 3100 | 4.09786 | 1.37067E-4 | 4.08227 | 1.37591E-4 | 3.00643 | 0 |
| 3200 | 4.0937 | 1.50912E-4 | 4.07841 | 1.51479E-4 | 3.00466 | 0 |
| 3300 | 4.08989 | 1.65656E-4 | 4.07487 | 1.66268E-4 | 3.00307 | 0 |
| 3400 | 4.08637 | 1.81327E-4 | 4.0716 | 1.81986E-4 | 3.00164 | 0 |
| 3500 | 4.08312 | 1.97953E-4 | 4.06857 | 1.98662E-4 | 3.00034 | 0 |
| 3600 | 4.08009 | 2.15563E-4 | 4.06574 | 2.16325E-4 | 2.99917 | 0 |
| 3700 | 4.07726 | 2.34184E-4 | 4.0631 | 2.35002E-4 | 2.99811 | 0 |
| 3800 | 4.07461 | 2.53846E-4 | 4.06061 | 2.54722E-4 | 2.99713 | 0 |
| 3900 | 4.07212 | 2.74577E-4 | 4.05827 | 2.75515E-4 | 2.99624 | 0 |
| 4000 | 4.06976 | 2.96405E-4 | 4.05606 | 2.97408E-4 | 2.99542 | 0 |
| 4100 | 4.06753 | 3.19359E-4 | 4.05396 | 3.2043E-4 | 2.99467 | 0 |
| 4200 | 4.0654 | 3.43467E-4 | 4.05195 | 3.44609E-4 | 2.99397 | 0 |
| 4300 | 4.06338 | 3.68758E-4 | 4.05004 | 3.69975E-4 | 2.99332 | 0 |
| 4400 | 4.06144 | 3.95261E-4 | 4.0482 | 3.96556E-4 | 2.99272 | 0 |
| 4500 | 4.05958 | 4.23004E-4 | 4.04644 | 4.2438E-4 | 2.99217 | 0 |
| 4600 | 4.05778 | 4.52016E-4 | 4.04473 | 4.53477E-4 | 2.99165 | 0 |
| 4700 | 4.05606 | 4.82326E-4 | 4.04309 | 4.83875E-4 | 2.99117 | 0 |
| 4800 | 4.05438 | 5.13961E-4 | 4.04149 | 5.15603E-4 | 2.99072 | 0 |
| 4900 | 4.05276 | 5.46952E-4 | 4.03994 | 5.4869E-4 | 2.99029 | 0 |
| 5000 | 4.05118 | 5.81326E-4 | 4.03843 | 5.83164E-4 | 2.9899 | 0 |
| 5100 | 4.04964 | 6.17113E-4 | 4.03696 | 6.19055E-4 | 2.98953 | 0 |
| 5200 | 4.04814 | 6.54341E-4 | 4.03552 | 6.56392E-4 | 2.98918 | 0 |
| 5300 | 4.04667 | 6.9304E-4 | 4.0341 | 6.95203E-4 | 2.98885 | 0 |
| 5400 | 4.04523 | 7.33238E-4 | 4.03271 | 7.35518E-4 | 2.98854 | 0 |
| 5500 | 4.04382 | 7.74964E-4 | 4.03135 | 7.77365E-4 | 2.98825 | 0 |
| 5600 | 4.04242 | 8.18248E-4 | 4.03 | 8.20774E-4 | 2.98797 | 0 |
| 5700 | 4.04105 | 8.63117E-4 | 4.02867 | 8.65773E-4 | 2.98771 | 0 |
| 5800 | 4.03969 | 9.09603E-4 | 4.02736 | 9.12393E-4 | 2.98746 | 0 |
| 5900 | 4.03835 | 9.57732E-4 | 4.02606 | 9.60662E-4 | 2.98723 | 0 |
| 6000 | 4.03703 | 0.00101 | 4.02477 | 0.00101 | 2.98701 | 0 |
| 6100 | 4.03571 | 0.00106 | 4.02349 | 0.00106 | 2.98679 | 0 |
| 6200 | 4.03441 | 0.00111 | 4.02222 | 0.00112 | 2.98659 | 0 |
| 6300 | 4.03311 | 0.00117 | 4.02095 | 0.00117 | 2.9864 | 0 |
| 6400 | 4.03182 | 0.00122 | 4.0197 | 0.00123 | 2.98622 | 0 |
| 6500 | 4.03054 | 0.00128 | 4.01844 | 0.00129 | 2.98605 | 0 |
| 6600 | 4.02926 | 0.00134 | 4.01719 | 0.00135 | 2.98588 | 0 |
| 6700 | 4.02799 | 0.00141 | 4.01594 | 0.00141 | 2.98573 | 0 |
| 6800 | 4.02672 | 0.00147 | 4.01469 | 0.00147 | 2.98558 | 0 |
| 6900 | 4.02545 | 0.00154 | 4.01344 | 0.00154 | 2.98543 | 0 |
| 7000 | 4.02417 | 0.0016 | 4.01219 | 0.00161 | 2.98529 | 0 |
| 7100 | 4.0229 | 0.00167 | 4.01094 | 0.00168 | 2.98516 | 0 |
| 7200 | 4.02163 | 0.00175 | 4.00969 | 0.00175 | 2.98504 | 0 |
| 7300 | 4.02036 | 0.00182 | 4.00844 | 0.00183 | 2.98492 | 0 |
| 7400 | 4.01908 | 0.0019 | 4.00718 | 0.0019 | 2.9848 | 0 |
| 7500 | 4.01781 | 0.00198 | 4.00592 | 0.00198 | 2.98469 | 0 |
| 7600 | 4.01652 | 0.00206 | 4.00465 | 0.00206 | 2.98458 | 0 |
| 7700 | 4.01524 | 0.00214 | 4.00338 | 0.00215 | 2.98448 | 0 |
| 7800 | 4.01395 | 0.00222 | 4.00211 | 0.00223 | 2.98438 | 0 |
| 7900 | 4.01265 | 0.00231 | 4.00082 | 0.00232 | 2.98429 | 0 |
| 8000 | 4.01135 | 0.0024 | 3.99954 | 0.00241 | 2.9842 | 0 |
| 8100 | 4.01004 | 0.00249 | 3.99824 | 0.0025 | 2.98411 | 0 |
| 8200 | 4.00873 | 0.00259 | 3.99694 | 0.00259 | 2.98403 | 0 |
| 8300 | 4.00741 | 0.00268 | 3.99563 | 0.00269 | 2.98394 | 0 |
| 8400 | 4.00608 | 0.00278 | 3.99431 | 0.00279 | 2.98387 | 0 |
| 8500 | 4.00475 | 0.00288 | 3.99299 | 0.00289 | 2.98379 | 0 |
| 8600 | 4.0034 | 0.00299 | 3.99166 | 0.003 | 2.98372 | 0 |
| 8700 | 4.00205 | 0.00309 | 3.99032 | 0.0031 | 2.98365 | 0 |
| 8800 | 4.0007 | 0.0032 | 3.98897 | 0.00321 | 2.98358 | 0 |
| 8900 | 3.99933 | 0.00331 | 3.98761 | 0.00332 | 2.98351 | 0 |
| 9000 | 3.99795 | 0.00343 | 3.98624 | 0.00344 | 2.98345 | 0 |
| 9100 | 3.99657 | 0.00354 | 3.98486 | 0.00355 | 2.98339 | 0 |
| 9200 | 3.99517 | 0.00366 | 3.98347 | 0.00367 | 2.98333 | 0 |
| 9300 | 3.99377 | 0.00378 | 3.98208 | 0.00379 | 2.98327 | 0 |
| 9400 | 3.99236 | 0.00391 | 3.98067 | 0.00392 | 2.98322 | 0 |
| 9500 | 3.99094 | 0.00404 | 3.97925 | 0.00405 | 2.98316 | 0 |
| 9600 | 3.9895 | 0.00417 | 3.97783 | 0.00418 | 2.98311 | 0 |
| 9700 | 3.98806 | 0.0043 | 3.97639 | 0.00431 | 2.98306 | 0 |
| 9800 | 3.98661 | 0.00443 | 3.97494 | 0.00445 | 2.98301 | 0 |
| 9900 | 3.98514 | 0.00457 | 3.97348 | 0.00459 | 2.98296 | 0 |
| 10000 | 3.98367 | 0.00471 | 3.97201 | 0.00473 | 2.98292 | 0 |
| 10100 | 3.98218 | 0.00486 | 3.97053 | 0.00487 | 2.98287 | 0 |
| 10200 | 3.98069 | 0.005 | 3.96904 | 0.00502 | 2.98283 | 0 |
| 10300 | 3.97918 | 0.00515 | 3.96754 | 0.00517 | 2.98279 | 0 |
| 10400 | 3.97766 | 0.00531 | 3.96602 | 0.00532 | 2.98275 | 0 |
| 10500 | 3.97613 | 0.00546 | 3.96449 | 0.00548 | 2.98271 | 0 |
| 10600 | 3.97459 | 0.00562 | 3.96296 | 0.00564 | 2.98267 | 0 |
| 10700 | 3.97304 | 0.00579 | 3.96141 | 0.0058 | 2.98263 | 0 |
| 10800 | 3.97148 | 0.00595 | 3.95985 | 0.00597 | 2.9826 | 0 |
| 10900 | 3.9699 | 0.00612 | 3.95827 | 0.00614 | 2.98256 | 0 |
| 11000 | 3.96832 | 0.00629 | 3.95669 | 0.00631 | 2.98253 | 0 |
| 11100 | 3.96672 | 0.00647 | 3.95509 | 0.00649 | 2.98249 | 0 |
| 11200 | 3.96511 | 0.00664 | 3.95348 | 0.00666 | 2.98246 | 0 |
| 11300 | 3.96348 | 0.00683 | 3.95186 | 0.00685 | 2.98243 | 0 |
| 11400 | 3.96185 | 0.00701 | 3.95023 | 0.00703 | 2.9824 | 0 |
| 11500 | 3.9602 | 0.0072 | 3.94858 | 0.00722 | 2.98237 | 0 |
| 11600 | 3.95854 | 0.00739 | 3.94692 | 0.00741 | 2.98234 | 0 |
| 11700 | 3.95687 | 0.00759 | 3.94525 | 0.00761 | 2.98231 | 0 |
| 11800 | 3.95519 | 0.00778 | 3.94357 | 0.00781 | 2.98228 | 0 |
| 11900 | 3.95349 | 0.00799 | 3.94187 | 0.00801 | 2.98226 | 0 |
| 12000 | 3.95178 | 0.00819 | 3.94016 | 0.00822 | 2.98223 | 0 |
| 12100 | 3.95006 | 0.0084 | 3.93844 | 0.00843 | 2.9822 | 0 |
| 12200 | 3.94833 | 0.00861 | 3.93671 | 0.00864 | 2.98218 | 0 |
| 12300 | 3.94658 | 0.00883 | 3.93496 | 0.00886 | 2.98215 | 0 |
| 12400 | 3.94482 | 0.00905 | 3.9332 | 0.00908 | 2.98213 | 0 |
| 12500 | 3.94305 | 0.00928 | 3.93143 | 0.0093 | 2.98211 | 0 |
| 12600 | 3.94127 | 0.0095 | 3.92964 | 0.00953 | 2.98209 | 0 |
| 12700 | 3.93947 | 0.00973 | 3.92784 | 0.00976 | 2.98206 | 0 |
| 12800 | 3.93766 | 0.00997 | 3.92603 | 0.01 | 2.98204 | 0 |
| 12900 | 3.93583 | 0.01021 | 3.92421 | 0.01024 | 2.98202 | 0 |
| 13000 | 3.934 | 0.01045 | 3.92237 | 0.01048 | 2.982 | 0 |
| 13100 | 3.93215 | 0.0107 | 3.92052 | 0.01073 | 2.98198 | 0 |
| 13200 | 3.93028 | 0.01095 | 3.91865 | 0.01098 | 2.98196 | 0 |
| 13300 | 3.92841 | 0.0112 | 3.91677 | 0.01124 | 2.98194 | 0 |
| 13400 | 3.92652 | 0.01146 | 3.91488 | 0.0115 | 2.98192 | 0 |
| 13500 | 3.92462 | 0.01173 | 3.91298 | 0.01176 | 2.9819 | 0 |
| 13600 | 3.9227 | 0.01199 | 3.91106 | 0.01203 | 2.98188 | 0 |
| 13700 | 3.92077 | 0.01226 | 3.90913 | 0.0123 | 2.98187 | 0 |
| 13800 | 3.91883 | 0.01254 | 3.90718 | 0.01258 | 2.98185 | 0 |
| 13900 | 3.91688 | 0.01282 | 3.90523 | 0.01286 | 2.98183 | 0 |
| 14000 | 3.91491 | 0.0131 | 3.90325 | 0.01314 | 2.98182 | 0 |
| 14100 | 3.91292 | 0.01339 | 3.90127 | 0.01343 | 2.9818 | 0 |
| 14200 | 3.91093 | 0.01368 | 3.89927 | 0.01372 | 2.98178 | 0 |
| 14300 | 3.90892 | 0.01398 | 3.89726 | 0.01402 | 2.98177 | 0 |
| 14400 | 3.9069 | 0.01428 | 3.89523 | 0.01432 | 2.98175 | 0 |
| 14500 | 3.90486 | 0.01458 | 3.89319 | 0.01463 | 2.98174 | 0 |
| 14600 | 3.90281 | 0.01489 | 3.89114 | 0.01494 | 2.98172 | 0 |
| 14700 | 3.90075 | 0.01521 | 3.88907 | 0.01525 | 2.98171 | 0 |
| 14800 | 3.89867 | 0.01553 | 3.88699 | 0.01557 | 2.9817 | 0 |
| 14900 | 3.89658 | 0.01585 | 3.8849 | 0.0159 | 2.98168 | 0 |
| 15000 | 3.89447 | 0.01618 | 3.88279 | 0.01622 | 2.98167 | 0 |
| 15100 | 3.89235 | 0.01651 | 3.88066 | 0.01656 | 2.98166 | 0 |
| 15200 | 3.89022 | 0.01685 | 3.87853 | 0.0169 | 2.98164 | 0 |
| 15300 | 3.88808 | 0.01719 | 3.87638 | 0.01724 | 2.98163 | 0 |
| 15400 | 3.88592 | 0.01753 | 3.87421 | 0.01759 | 2.98162 | 0 |
| 15500 | 3.88374 | 0.01789 | 3.87204 | 0.01794 | 2.98161 | 0 |
| 15600 | 3.88155 | 0.01824 | 3.86984 | 0.0183 | 2.98159 | 0 |
| 15700 | 3.87935 | 0.0186 | 3.86764 | 0.01866 | 2.98158 | 0 |
| 15800 | 3.87714 | 0.01897 | 3.86542 | 0.01903 | 2.98157 | 0 |
| 15900 | 3.87491 | 0.01934 | 3.86319 | 0.0194 | 2.98156 | 0 |
| 16000 | 3.87267 | 0.01971 | 3.86094 | 0.01977 | 2.98155 | 0 |
| 16100 | 3.87041 | 0.02009 | 3.85868 | 0.02016 | 2.98154 | 0 |
| 16200 | 3.86814 | 0.02048 | 3.8564 | 0.02054 | 2.98153 | 0 |
| 16300 | 3.86585 | 0.02087 | 3.85411 | 0.02094 | 2.98152 | 0 |
| 16400 | 3.86355 | 0.02127 | 3.8518 | 0.02133 | 2.98151 | 0 |
| 16500 | 3.86124 | 0.02167 | 3.84949 | 0.02173 | 2.9815 | 0 |
| 16600 | 3.85891 | 0.02207 | 3.84715 | 0.02214 | 2.98149 | 0 |
| 16700 | 3.85657 | 0.02249 | 3.84481 | 0.02256 | 2.98148 | 0 |
| 16800 | 3.85421 | 0.0229 | 3.84245 | 0.02297 | 2.98147 | 0 |
| 16900 | 3.85184 | 0.02333 | 3.84007 | 0.0234 | 2.98146 | 0 |
| 17000 | 3.84946 | 0.02375 | 3.83768 | 0.02383 | 2.98145 | 0 |

**Supplementary Note 11: PdSe2 tabulated BSE ab initio optical constants**

**Table S5.** PdSe2 anisotropic optical constants obtained by BSE simulations.

| *λ* (nm) | *n*a | *k*a | *n*b | *k*b | *n*c | *k*c |
| --- | --- | --- | --- | --- | --- | --- |
| 272.56341 | 0.09262 | 1.80191 | 0.09212 | 1.75205 | 0.07962 | 0.88676 |
| 272.83329 | 0.09327 | 1.80596 | 0.09274 | 1.75599 | 0.08004 | 0.89023 |
| 273.10971 | 0.09395 | 1.81003 | 0.09338 | 1.75995 | 0.08039 | 0.89379 |
| 273.38066 | 0.09465 | 1.81413 | 0.09402 | 1.7639 | 0.0808 | 0.89729 |
| 273.65819 | 0.09537 | 1.81821 | 0.09469 | 1.76787 | 0.08125 | 0.90089 |
| 273.93024 | 0.09609 | 1.82234 | 0.09535 | 1.77186 | 0.08165 | 0.90442 |
| 274.20889 | 0.09685 | 1.82649 | 0.09604 | 1.77584 | 0.0821 | 0.90799 |
| 274.48203 | 0.09762 | 1.83064 | 0.09672 | 1.77985 | 0.08261 | 0.91155 |
| 274.7618 | 0.09843 | 1.8348 | 0.0974 | 1.78387 | 0.0831 | 0.91515 |
| 275.04214 | 0.09924 | 1.83901 | 0.0981 | 1.78788 | 0.08359 | 0.91874 |
| 275.31695 | 0.1001 | 1.84318 | 0.0988 | 1.79194 | 0.08408 | 0.92237 |
| 275.59843 | 0.10098 | 1.8474 | 0.0995 | 1.796 | 0.08462 | 0.92594 |
| 275.87434 | 0.10188 | 1.85162 | 0.10022 | 1.80004 | 0.08514 | 0.9296 |
| 276.15696 | 0.10281 | 1.85585 | 0.10091 | 1.80413 | 0.08573 | 0.93319 |
| 276.434 | 0.10376 | 1.8601 | 0.10165 | 1.80824 | 0.0863 | 0.93683 |
| 276.71777 | 0.10473 | 1.86434 | 0.10235 | 1.81237 | 0.08687 | 0.94045 |
| 276.99593 | 0.10575 | 1.8686 | 0.10308 | 1.81654 | 0.08749 | 0.94412 |
| 277.28086 | 0.10679 | 1.87286 | 0.10383 | 1.82071 | 0.0881 | 0.94777 |
| 277.56016 | 0.10785 | 1.87713 | 0.10458 | 1.82492 | 0.08876 | 0.95141 |
| 277.84624 | 0.10893 | 1.8814 | 0.10532 | 1.82915 | 0.08947 | 0.95509 |
| 278.12668 | 0.11007 | 1.88566 | 0.10611 | 1.8334 | 0.09012 | 0.95871 |
| 278.41394 | 0.11119 | 1.88994 | 0.1069 | 1.8377 | 0.09082 | 0.96237 |
| 278.70179 | 0.11237 | 1.89418 | 0.10771 | 1.84201 | 0.09156 | 0.96607 |
| 278.98396 | 0.11357 | 1.89845 | 0.10856 | 1.84637 | 0.0923 | 0.9697 |
| 279.27299 | 0.11478 | 1.9027 | 0.10942 | 1.85072 | 0.09308 | 0.97338 |
| 279.55632 | 0.11602 | 1.90695 | 0.11032 | 1.85512 | 0.09385 | 0.97704 |
| 279.84654 | 0.11728 | 1.91119 | 0.11124 | 1.85954 | 0.09463 | 0.98069 |
| 280.13103 | 0.11856 | 1.91543 | 0.11218 | 1.86397 | 0.09545 | 0.98433 |
| 280.42244 | 0.11987 | 1.91965 | 0.11317 | 1.86842 | 0.09631 | 0.98797 |
| 280.70811 | 0.12116 | 1.92387 | 0.11421 | 1.8729 | 0.09716 | 0.99164 |
| 281.00073 | 0.12251 | 1.92808 | 0.11527 | 1.87739 | 0.09802 | 0.99524 |
| 281.28757 | 0.12384 | 1.93231 | 0.11635 | 1.8819 | 0.09891 | 0.99884 |
| 281.5814 | 0.1252 | 1.93651 | 0.1175 | 1.8864 | 0.0998 | 1.00248 |
| 281.86943 | 0.12655 | 1.9407 | 0.11867 | 1.89089 | 0.10069 | 1.00605 |
| 282.16447 | 0.12792 | 1.94491 | 0.11987 | 1.89541 | 0.10162 | 1.00967 |
| 282.46014 | 0.12932 | 1.94911 | 0.12111 | 1.89994 | 0.10254 | 1.01322 |
| 282.74997 | 0.13073 | 1.95328 | 0.1224 | 1.90444 | 0.10347 | 1.01676 |
| 283.04686 | 0.13216 | 1.95746 | 0.12371 | 1.90895 | 0.10438 | 1.02034 |
| 283.3379 | 0.13359 | 1.96164 | 0.12504 | 1.91344 | 0.10534 | 1.02386 |
| 283.63603 | 0.13506 | 1.96582 | 0.12641 | 1.91794 | 0.10624 | 1.02737 |
| 283.92829 | 0.13652 | 1.96998 | 0.12781 | 1.9224 | 0.10719 | 1.03092 |
| 284.22766 | 0.13798 | 1.97414 | 0.12925 | 1.92686 | 0.10808 | 1.0344 |
| 284.52113 | 0.13949 | 1.9783 | 0.13069 | 1.93132 | 0.10897 | 1.03792 |
| 284.82176 | 0.14101 | 1.98242 | 0.13214 | 1.93576 | 0.1099 | 1.04138 |
| 285.11646 | 0.14253 | 1.98653 | 0.13362 | 1.94017 | 0.11077 | 1.04493 |
| 285.41835 | 0.14405 | 1.99064 | 0.13512 | 1.94457 | 0.11165 | 1.04841 |
| 285.71429 | 0.14558 | 1.99472 | 0.13664 | 1.94897 | 0.11246 | 1.05193 |
| 286.01744 | 0.14714 | 1.99876 | 0.13815 | 1.95335 | 0.11332 | 1.05543 |
| 286.32123 | 0.14867 | 2.0028 | 0.13968 | 1.95771 | 0.11417 | 1.05898 |
| 286.61905 | 0.15019 | 2.0068 | 0.1412 | 1.96207 | 0.11501 | 1.06256 |
| 286.92413 | 0.15171 | 2.0108 | 0.14275 | 1.96641 | 0.11579 | 1.06612 |
| 287.2232 | 0.15322 | 2.01476 | 0.14429 | 1.97074 | 0.11661 | 1.06977 |
| 287.52956 | 0.15468 | 2.01872 | 0.14582 | 1.97506 | 0.11744 | 1.07336 |
| 287.8299 | 0.15613 | 2.02264 | 0.14737 | 1.97937 | 0.11824 | 1.07702 |
| 288.13756 | 0.15756 | 2.02658 | 0.14889 | 1.98368 | 0.11909 | 1.08069 |
| 288.43917 | 0.15893 | 2.03048 | 0.15043 | 1.98797 | 0.11993 | 1.08438 |
| 288.74814 | 0.16024 | 2.03442 | 0.15194 | 1.99226 | 0.12076 | 1.08811 |
| 289.05103 | 0.16155 | 2.03836 | 0.15344 | 1.99656 | 0.12163 | 1.09188 |
| 289.3613 | 0.1628 | 2.04233 | 0.15494 | 2.00083 | 0.12253 | 1.09563 |
| 289.67225 | 0.164 | 2.04634 | 0.1564 | 2.00513 | 0.12343 | 1.09942 |
| 289.97708 | 0.16517 | 2.05036 | 0.15786 | 2.00943 | 0.12436 | 1.10321 |
| 290.28935 | 0.16632 | 2.05445 | 0.15928 | 2.01377 | 0.12529 | 1.10702 |
| 290.59549 | 0.16745 | 2.05858 | 0.1607 | 2.0181 | 0.12626 | 1.11083 |
| 290.90909 | 0.16854 | 2.06277 | 0.1621 | 2.02247 | 0.12721 | 1.11467 |
| 291.21653 | 0.16962 | 2.06702 | 0.1635 | 2.02688 | 0.12821 | 1.1185 |
| 291.53148 | 0.17071 | 2.07131 | 0.16487 | 2.03133 | 0.12924 | 1.12236 |
| 291.84024 | 0.1718 | 2.0757 | 0.16625 | 2.03581 | 0.13026 | 1.12622 |
| 292.15654 | 0.1729 | 2.08014 | 0.16764 | 2.04034 | 0.13128 | 1.13006 |
| 292.46663 | 0.17401 | 2.08463 | 0.16903 | 2.04491 | 0.13233 | 1.13394 |
| 292.78428 | 0.17516 | 2.08921 | 0.17045 | 2.04953 | 0.13341 | 1.1378 |
| 293.09571 | 0.17635 | 2.09382 | 0.17187 | 2.0542 | 0.13449 | 1.1417 |
| 293.41473 | 0.17758 | 2.09848 | 0.17335 | 2.0589 | 0.13556 | 1.14563 |
| 293.73445 | 0.17885 | 2.10321 | 0.17484 | 2.06365 | 0.13667 | 1.14951 |
| 294.0479 | 0.18017 | 2.10798 | 0.17637 | 2.06843 | 0.13776 | 1.15346 |
| 294.36901 | 0.18154 | 2.11276 | 0.17796 | 2.07325 | 0.13889 | 1.15741 |
| 294.68381 | 0.18299 | 2.11759 | 0.17956 | 2.07809 | 0.14001 | 1.16138 |
| 295.0063 | 0.18448 | 2.12244 | 0.18126 | 2.08294 | 0.14116 | 1.16534 |
| 295.32247 | 0.18603 | 2.1273 | 0.18297 | 2.08782 | 0.14234 | 1.16934 |
| 295.64637 | 0.18765 | 2.13216 | 0.18474 | 2.09271 | 0.14352 | 1.17337 |
| 295.96391 | 0.18933 | 2.13704 | 0.18657 | 2.0976 | 0.14472 | 1.17743 |
| 296.28922 | 0.19105 | 2.14189 | 0.18844 | 2.10248 | 0.14596 | 1.18148 |
| 296.60814 | 0.19283 | 2.14674 | 0.19036 | 2.10738 | 0.14723 | 1.18557 |
| 296.93487 | 0.19465 | 2.15155 | 0.19231 | 2.11225 | 0.14857 | 1.18969 |
| 297.25518 | 0.19651 | 2.15634 | 0.1943 | 2.11709 | 0.1499 | 1.1938 |
| 297.58334 | 0.19839 | 2.16112 | 0.19633 | 2.12194 | 0.15126 | 1.19791 |
| 297.91221 | 0.20031 | 2.16585 | 0.1984 | 2.12677 | 0.1527 | 1.20205 |
| 298.23464 | 0.20223 | 2.17055 | 0.20049 | 2.13157 | 0.15416 | 1.20618 |
| 298.56496 | 0.20416 | 2.17524 | 0.20261 | 2.13634 | 0.15566 | 1.21034 |
| 298.88881 | 0.20609 | 2.17988 | 0.20473 | 2.1411 | 0.15723 | 1.21446 |
| 299.22058 | 0.20803 | 2.18451 | 0.20689 | 2.14586 | 0.15883 | 1.21858 |
| 299.54585 | 0.20992 | 2.18912 | 0.20904 | 2.15058 | 0.16043 | 1.22268 |
| 299.87908 | 0.21181 | 2.19373 | 0.2112 | 2.15527 | 0.16209 | 1.22677 |
| 300.20579 | 0.21368 | 2.19833 | 0.21338 | 2.15996 | 0.16379 | 1.23082 |
| 300.54049 | 0.21553 | 2.20292 | 0.21556 | 2.16462 | 0.16548 | 1.23486 |
| 300.86864 | 0.21735 | 2.20754 | 0.21772 | 2.16929 | 0.16725 | 1.2389 |
| 301.20482 | 0.21913 | 2.21217 | 0.21988 | 2.17392 | 0.16896 | 1.24288 |
| 301.53442 | 0.22088 | 2.21684 | 0.22203 | 2.17858 | 0.17075 | 1.24682 |
| 301.87209 | 0.22262 | 2.22154 | 0.22417 | 2.1832 | 0.17249 | 1.25078 |
| 302.21052 | 0.22434 | 2.22628 | 0.22627 | 2.18785 | 0.17426 | 1.2547 |
| 302.54233 | 0.22605 | 2.2311 | 0.22839 | 2.1925 | 0.17603 | 1.2586 |
| 302.88227 | 0.22776 | 2.23595 | 0.2305 | 2.19719 | 0.17778 | 1.2625 |
| 303.21555 | 0.22947 | 2.24086 | 0.2326 | 2.20186 | 0.17952 | 1.26642 |
| 303.557 | 0.2312 | 2.24585 | 0.23468 | 2.20658 | 0.1813 | 1.2703 |
| 303.89178 | 0.23295 | 2.2509 | 0.23678 | 2.21133 | 0.18302 | 1.2742 |
| 304.23475 | 0.23473 | 2.25601 | 0.23889 | 2.21609 | 0.18477 | 1.2781 |
| 304.57102 | 0.23654 | 2.26118 | 0.24101 | 2.2209 | 0.1865 | 1.28202 |
| 304.91553 | 0.23842 | 2.26642 | 0.24314 | 2.22572 | 0.18823 | 1.28594 |
| 305.25331 | 0.24035 | 2.27171 | 0.2453 | 2.23058 | 0.18997 | 1.28992 |
| 305.59937 | 0.24233 | 2.27704 | 0.24747 | 2.23543 | 0.19175 | 1.29386 |
| 305.94621 | 0.24439 | 2.28242 | 0.24967 | 2.24032 | 0.19351 | 1.29786 |
| 306.28628 | 0.24654 | 2.28783 | 0.25191 | 2.24523 | 0.1953 | 1.30186 |
| 306.63468 | 0.24875 | 2.29327 | 0.25418 | 2.25016 | 0.19711 | 1.30585 |
| 306.97628 | 0.25103 | 2.29872 | 0.25647 | 2.25508 | 0.19895 | 1.30988 |
| 307.32626 | 0.25341 | 2.30417 | 0.25876 | 2.25999 | 0.20081 | 1.31393 |
| 307.6694 | 0.25584 | 2.30962 | 0.26109 | 2.26492 | 0.2027 | 1.31795 |
| 308.02097 | 0.25835 | 2.31509 | 0.26345 | 2.26987 | 0.20465 | 1.322 |
| 308.36566 | 0.26095 | 2.32054 | 0.26582 | 2.27481 | 0.20659 | 1.32604 |
| 308.71882 | 0.26359 | 2.32596 | 0.26819 | 2.27974 | 0.2086 | 1.33004 |
| 309.06508 | 0.26633 | 2.33136 | 0.27058 | 2.28469 | 0.2106 | 1.33407 |
| 309.41984 | 0.26909 | 2.33675 | 0.27299 | 2.28966 | 0.21266 | 1.33807 |
| 309.76767 | 0.27191 | 2.3421 | 0.27538 | 2.29463 | 0.21471 | 1.34205 |
| 310.12405 | 0.27479 | 2.34743 | 0.27781 | 2.29963 | 0.21675 | 1.34602 |
| 310.48125 | 0.27772 | 2.35273 | 0.28024 | 2.30463 | 0.21882 | 1.34996 |
| 310.83147 | 0.28068 | 2.358 | 0.2827 | 2.30968 | 0.22091 | 1.35392 |
| 311.1903 | 0.2837 | 2.36324 | 0.28517 | 2.31474 | 0.22296 | 1.35787 |
| 311.54213 | 0.28673 | 2.36844 | 0.28767 | 2.31982 | 0.22504 | 1.36178 |
| 311.90261 | 0.28981 | 2.37364 | 0.29022 | 2.32494 | 0.2271 | 1.36571 |
| 312.25605 | 0.29292 | 2.3788 | 0.2928 | 2.33009 | 0.22918 | 1.36968 |
| 312.61818 | 0.29606 | 2.38394 | 0.29543 | 2.33525 | 0.23125 | 1.37364 |
| 312.97325 | 0.29926 | 2.38905 | 0.29811 | 2.34042 | 0.23331 | 1.37758 |
| 313.33704 | 0.30247 | 2.39414 | 0.30086 | 2.34562 | 0.23538 | 1.38159 |
| 313.69374 | 0.30575 | 2.39918 | 0.30366 | 2.35081 | 0.23748 | 1.3856 |
| 314.05922 | 0.30906 | 2.40421 | 0.30654 | 2.35599 | 0.2396 | 1.38961 |
| 314.41757 | 0.31241 | 2.40919 | 0.30947 | 2.36114 | 0.24173 | 1.39368 |
| 314.78473 | 0.31581 | 2.41413 | 0.31248 | 2.36625 | 0.24389 | 1.39774 |
| 315.15275 | 0.31924 | 2.41901 | 0.31554 | 2.37132 | 0.24611 | 1.40181 |
| 315.5136 | 0.32273 | 2.42383 | 0.31864 | 2.37633 | 0.24834 | 1.40591 |
| 315.88333 | 0.32626 | 2.42857 | 0.3218 | 2.38127 | 0.2506 | 1.41 |
| 316.24586 | 0.32981 | 2.43324 | 0.32498 | 2.38613 | 0.25292 | 1.4141 |
| 316.6173 | 0.33337 | 2.43781 | 0.32816 | 2.3909 | 0.25526 | 1.41819 |
| 316.98152 | 0.33694 | 2.44228 | 0.33134 | 2.3956 | 0.25766 | 1.42225 |
| 317.3547 | 0.34051 | 2.44666 | 0.3345 | 2.40018 | 0.26008 | 1.4263 |
| 317.72061 | 0.34404 | 2.45091 | 0.33761 | 2.4047 | 0.26252 | 1.43036 |
| 318.09553 | 0.34753 | 2.45507 | 0.34066 | 2.40914 | 0.26499 | 1.43437 |
| 318.46316 | 0.35096 | 2.45912 | 0.34365 | 2.41352 | 0.26749 | 1.43838 |
| 318.83983 | 0.35431 | 2.46307 | 0.34653 | 2.41785 | 0.27001 | 1.44236 |
| 319.20918 | 0.35755 | 2.46695 | 0.3493 | 2.42213 | 0.27252 | 1.4463 |
| 319.58763 | 0.36068 | 2.47073 | 0.35196 | 2.42641 | 0.27506 | 1.45023 |
| 319.96697 | 0.36368 | 2.47446 | 0.35451 | 2.43069 | 0.27758 | 1.45415 |
| 320.33894 | 0.36654 | 2.47816 | 0.35692 | 2.43501 | 0.28014 | 1.45804 |
| 320.72007 | 0.36923 | 2.48182 | 0.35923 | 2.43935 | 0.28268 | 1.46192 |
| 321.09379 | 0.37176 | 2.4855 | 0.36143 | 2.44379 | 0.2852 | 1.46579 |
| 321.47672 | 0.37412 | 2.48919 | 0.3635 | 2.44829 | 0.28776 | 1.46963 |
| 321.85221 | 0.3763 | 2.49293 | 0.3655 | 2.45292 | 0.29026 | 1.47348 |
| 322.23695 | 0.37833 | 2.49676 | 0.36743 | 2.45764 | 0.29279 | 1.47734 |
| 322.61422 | 0.3802 | 2.50069 | 0.36926 | 2.46249 | 0.2953 | 1.48118 |
| 323.00078 | 0.38189 | 2.50476 | 0.37107 | 2.46749 | 0.29781 | 1.48502 |
| 323.37984 | 0.38348 | 2.50898 | 0.37284 | 2.47263 | 0.30032 | 1.48889 |
| 323.76824 | 0.38494 | 2.51336 | 0.37459 | 2.47793 | 0.30283 | 1.49275 |
| 324.14911 | 0.38631 | 2.51794 | 0.37634 | 2.48337 | 0.30532 | 1.49664 |
| 324.53936 | 0.3876 | 2.52272 | 0.37811 | 2.48899 | 0.30779 | 1.50054 |
| 324.93056 | 0.38884 | 2.52775 | 0.37992 | 2.49472 | 0.31028 | 1.50445 |
| 325.31416 | 0.39008 | 2.53297 | 0.38176 | 2.50063 | 0.31278 | 1.50839 |
| 325.70723 | 0.39131 | 2.53843 | 0.38368 | 2.50667 | 0.31527 | 1.51235 |
| 326.09267 | 0.39259 | 2.54414 | 0.38568 | 2.51284 | 0.31777 | 1.51634 |
| 326.48763 | 0.39394 | 2.55004 | 0.38777 | 2.51914 | 0.32026 | 1.52035 |
| 326.87492 | 0.39538 | 2.55617 | 0.38993 | 2.52556 | 0.32278 | 1.52443 |
| 327.27177 | 0.39692 | 2.56251 | 0.39223 | 2.53208 | 0.32532 | 1.52851 |
| 327.66092 | 0.3986 | 2.569 | 0.39463 | 2.53869 | 0.3279 | 1.53265 |
| 328.05969 | 0.40044 | 2.57568 | 0.39715 | 2.54539 | 0.33049 | 1.53682 |
| 328.45072 | 0.40244 | 2.58253 | 0.39978 | 2.55218 | 0.33312 | 1.54103 |
| 328.85141 | 0.40462 | 2.58948 | 0.40254 | 2.55903 | 0.33579 | 1.5453 |
| 329.25307 | 0.40698 | 2.59654 | 0.40543 | 2.56593 | 0.33854 | 1.54958 |
| 329.64696 | 0.40955 | 2.60371 | 0.40843 | 2.57288 | 0.34134 | 1.55387 |
| 330.05057 | 0.4123 | 2.61094 | 0.41159 | 2.5799 | 0.34424 | 1.5582 |
| 330.44637 | 0.41524 | 2.61823 | 0.41485 | 2.58693 | 0.34718 | 1.56257 |
| 330.85194 | 0.41837 | 2.62554 | 0.41825 | 2.59402 | 0.35025 | 1.5669 |
| 331.24967 | 0.42171 | 2.63288 | 0.42178 | 2.60111 | 0.35338 | 1.57124 |
| 331.65722 | 0.42521 | 2.64023 | 0.42544 | 2.60822 | 0.35661 | 1.57552 |
| 332.05688 | 0.4289 | 2.64756 | 0.42925 | 2.61535 | 0.35992 | 1.57979 |
| 332.46642 | 0.43279 | 2.65486 | 0.4332 | 2.62249 | 0.36332 | 1.58401 |
| 332.86803 | 0.43681 | 2.66214 | 0.43729 | 2.62961 | 0.36678 | 1.58815 |
| 333.27958 | 0.44102 | 2.66938 | 0.44153 | 2.63673 | 0.3703 | 1.59221 |
| 333.68316 | 0.44537 | 2.67656 | 0.44591 | 2.64381 | 0.37386 | 1.59617 |
| 334.09673 | 0.44987 | 2.68367 | 0.45044 | 2.65083 | 0.37746 | 1.60002 |
| 334.51132 | 0.45451 | 2.69072 | 0.45511 | 2.6578 | 0.38107 | 1.60378 |
| 334.91789 | 0.45926 | 2.69769 | 0.45992 | 2.6647 | 0.38468 | 1.60744 |
| 335.33452 | 0.46416 | 2.70458 | 0.46487 | 2.67152 | 0.38827 | 1.61101 |
| 335.7431 | 0.46914 | 2.71136 | 0.46994 | 2.67822 | 0.39177 | 1.61446 |
| 336.16179 | 0.47423 | 2.71807 | 0.4751 | 2.68478 | 0.39525 | 1.61784 |
| 336.57239 | 0.47942 | 2.72465 | 0.48034 | 2.69121 | 0.39863 | 1.62117 |
| 336.99315 | 0.48469 | 2.73114 | 0.48565 | 2.69749 | 0.40193 | 1.62442 |
| 337.40578 | 0.49001 | 2.73752 | 0.49099 | 2.70364 | 0.40509 | 1.62767 |
| 337.82863 | 0.49538 | 2.74377 | 0.49634 | 2.70962 | 0.40815 | 1.63089 |
| 338.24332 | 0.50077 | 2.74994 | 0.50168 | 2.71545 | 0.41111 | 1.63411 |
| 338.66827 | 0.50619 | 2.756 | 0.50697 | 2.72116 | 0.41395 | 1.63739 |
| 339.08502 | 0.51163 | 2.76197 | 0.51219 | 2.72673 | 0.4167 | 1.64074 |
| 339.51209 | 0.51705 | 2.76784 | 0.51731 | 2.7322 | 0.41933 | 1.64415 |
| 339.94024 | 0.52247 | 2.77366 | 0.52234 | 2.7376 | 0.42189 | 1.64769 |
| 340.36012 | 0.52787 | 2.7794 | 0.52722 | 2.74295 | 0.42441 | 1.65137 |
| 340.79041 | 0.53325 | 2.78511 | 0.53199 | 2.74827 | 0.42685 | 1.65514 |
| 341.2124 | 0.53861 | 2.79077 | 0.53662 | 2.75361 | 0.42933 | 1.6591 |
| 341.64485 | 0.54396 | 2.79643 | 0.54114 | 2.75899 | 0.43179 | 1.6632 |
| 342.06897 | 0.54929 | 2.80206 | 0.54554 | 2.76444 | 0.43428 | 1.66745 |
| 342.50359 | 0.55464 | 2.80769 | 0.54984 | 2.76999 | 0.43685 | 1.67187 |
| 342.92984 | 0.56 | 2.81332 | 0.55407 | 2.77564 | 0.43951 | 1.67642 |
| 343.36665 | 0.56537 | 2.81896 | 0.55824 | 2.78144 | 0.44228 | 1.68107 |
| 343.79505 | 0.57076 | 2.82458 | 0.56239 | 2.78738 | 0.44517 | 1.68588 |
| 344.23408 | 0.57619 | 2.83021 | 0.56652 | 2.79346 | 0.44823 | 1.69077 |
| 344.66465 | 0.58168 | 2.83583 | 0.57068 | 2.79971 | 0.45146 | 1.69573 |
| 345.1059 | 0.5872 | 2.84143 | 0.57491 | 2.8061 | 0.45483 | 1.70076 |
| 345.54828 | 0.59277 | 2.84698 | 0.57919 | 2.81263 | 0.4584 | 1.70582 |
| 345.98214 | 0.59839 | 2.8525 | 0.58358 | 2.8193 | 0.46219 | 1.71088 |
| 346.42678 | 0.60403 | 2.85798 | 0.58808 | 2.82608 | 0.46613 | 1.71592 |
| 346.86285 | 0.60971 | 2.86341 | 0.59269 | 2.83295 | 0.47029 | 1.72095 |
| 347.30975 | 0.6154 | 2.86878 | 0.59743 | 2.83992 | 0.47462 | 1.72591 |
| 347.74805 | 0.62112 | 2.87409 | 0.60231 | 2.84694 | 0.47915 | 1.73078 |
| 348.19724 | 0.62681 | 2.87934 | 0.60734 | 2.85401 | 0.48383 | 1.73551 |
| 348.63778 | 0.63251 | 2.88454 | 0.61252 | 2.86113 | 0.48867 | 1.74014 |
| 349.08927 | 0.63817 | 2.88968 | 0.61781 | 2.86827 | 0.49363 | 1.74461 |
| 349.53208 | 0.64378 | 2.8948 | 0.62327 | 2.87541 | 0.4987 | 1.74894 |
| 349.98589 | 0.64934 | 2.89987 | 0.62883 | 2.88256 | 0.50388 | 1.75308 |
| 350.44088 | 0.65486 | 2.90495 | 0.63453 | 2.88969 | 0.50916 | 1.75703 |
| 350.88712 | 0.6603 | 2.91003 | 0.64035 | 2.89684 | 0.51443 | 1.76078 |
| 351.34446 | 0.6657 | 2.91514 | 0.64628 | 2.90394 | 0.51975 | 1.76432 |
| 351.79301 | 0.67103 | 2.9203 | 0.65233 | 2.91102 | 0.52504 | 1.76767 |
| 352.25271 | 0.6763 | 2.92554 | 0.65848 | 2.91808 | 0.53032 | 1.77083 |
| 352.70359 | 0.68154 | 2.93085 | 0.66473 | 2.92511 | 0.53552 | 1.7738 |
| 353.16567 | 0.68677 | 2.93628 | 0.67108 | 2.93212 | 0.54063 | 1.77662 |
| 353.61889 | 0.692 | 2.94183 | 0.67752 | 2.93909 | 0.54564 | 1.77928 |
| 354.08338 | 0.69728 | 2.94752 | 0.68405 | 2.94604 | 0.55053 | 1.78182 |
| 354.53896 | 0.7026 | 2.95333 | 0.69068 | 2.95294 | 0.55528 | 1.78422 |
| 355.00587 | 0.70801 | 2.95927 | 0.69741 | 2.95981 | 0.55988 | 1.78655 |
| 355.46382 | 0.71355 | 2.96532 | 0.70422 | 2.96663 | 0.56431 | 1.78881 |
| 355.93318 | 0.71923 | 2.9715 | 0.7111 | 2.97343 | 0.5686 | 1.79106 |
| 356.40377 | 0.72506 | 2.97775 | 0.71808 | 2.98017 | 0.57272 | 1.79327 |
| 356.86534 | 0.7311 | 2.98408 | 0.72514 | 2.98686 | 0.57672 | 1.7955 |
| 357.33841 | 0.73732 | 2.99042 | 0.73227 | 2.99351 | 0.58056 | 1.79776 |
| 357.8024 | 0.74375 | 2.99679 | 0.73947 | 3.0001 | 0.58425 | 1.80007 |
| 358.27795 | 0.7504 | 3.00313 | 0.74675 | 3.00665 | 0.58784 | 1.80243 |
| 358.74439 | 0.75726 | 3.00941 | 0.75408 | 3.01314 | 0.59134 | 1.80488 |
| 359.22246 | 0.76431 | 3.0156 | 0.76148 | 3.01956 | 0.59473 | 1.80737 |
| 359.69136 | 0.77156 | 3.02169 | 0.76894 | 3.02593 | 0.59807 | 1.81 |
| 360.17195 | 0.77895 | 3.02765 | 0.77644 | 3.03225 | 0.60132 | 1.81267 |
| 360.64334 | 0.78651 | 3.03345 | 0.78397 | 3.0385 | 0.60452 | 1.81548 |
| 361.12648 | 0.7942 | 3.03909 | 0.79152 | 3.0447 | 0.60769 | 1.81835 |
| 361.60037 | 0.80197 | 3.04455 | 0.79912 | 3.05087 | 0.61082 | 1.82132 |
| 362.08608 | 0.80983 | 3.04982 | 0.80672 | 3.05701 | 0.61394 | 1.82437 |
| 362.5731 | 0.81773 | 3.05493 | 0.81434 | 3.06309 | 0.61704 | 1.82752 |
| 363.0508 | 0.82564 | 3.05985 | 0.82198 | 3.06919 | 0.62012 | 1.83078 |
| 363.54041 | 0.83358 | 3.06461 | 0.82962 | 3.07527 | 0.62319 | 1.83411 |
| 364.02067 | 0.8415 | 3.06922 | 0.83729 | 3.08136 | 0.62625 | 1.83752 |
| 364.5129 | 0.84939 | 3.07367 | 0.845 | 3.08746 | 0.62932 | 1.84104 |
| 364.99573 | 0.85726 | 3.078 | 0.85273 | 3.0936 | 0.63236 | 1.84466 |
| 365.49061 | 0.86508 | 3.0822 | 0.8605 | 3.09975 | 0.63544 | 1.8484 |
| 365.97603 | 0.87284 | 3.0863 | 0.86833 | 3.10595 | 0.63855 | 1.85225 |
| 366.47358 | 0.88056 | 3.09029 | 0.87625 | 3.11219 | 0.64168 | 1.85622 |
| 366.96162 | 0.88822 | 3.09421 | 0.88425 | 3.11848 | 0.64484 | 1.8603 |
| 367.46185 | 0.89583 | 3.09803 | 0.89234 | 3.1248 | 0.64809 | 1.86449 |
| 367.95252 | 0.90338 | 3.10179 | 0.90056 | 3.13115 | 0.65137 | 1.86882 |
| 368.45546 | 0.91089 | 3.10548 | 0.90893 | 3.13754 | 0.65477 | 1.87324 |
| 368.95977 | 0.91833 | 3.10911 | 0.91743 | 3.14394 | 0.65827 | 1.8778 |
| 369.45446 | 0.92572 | 3.11266 | 0.9261 | 3.15036 | 0.6619 | 1.88245 |
| 369.96151 | 0.93305 | 3.11617 | 0.93494 | 3.15674 | 0.66565 | 1.88717 |
| 370.45889 | 0.9403 | 3.11963 | 0.94397 | 3.16308 | 0.66957 | 1.89196 |
| 370.96871 | 0.94751 | 3.12302 | 0.95318 | 3.16938 | 0.67362 | 1.89683 |
| 371.4688 | 0.95464 | 3.12638 | 0.96258 | 3.17557 | 0.67786 | 1.90173 |
| 371.9814 | 0.96167 | 3.1297 | 0.97216 | 3.18167 | 0.68224 | 1.90666 |
| 372.48423 | 0.96863 | 3.13298 | 0.98193 | 3.18761 | 0.68678 | 1.91159 |
| 372.99964 | 0.97548 | 3.13624 | 0.99182 | 3.19342 | 0.69152 | 1.91651 |
| 373.50523 | 0.98224 | 3.13947 | 1.00187 | 3.19902 | 0.69639 | 1.9214 |
| 374.02347 | 0.98889 | 3.14272 | 1.01202 | 3.20445 | 0.70143 | 1.92621 |
| 374.54315 | 0.99541 | 3.14599 | 1.02224 | 3.20967 | 0.7066 | 1.93101 |
| 375.05293 | 1.00181 | 3.14929 | 1.03251 | 3.21468 | 0.71191 | 1.93572 |
| 375.57548 | 1.0081 | 3.15266 | 1.0428 | 3.21951 | 0.71735 | 1.94033 |
| 376.08808 | 1.01426 | 3.15611 | 1.05307 | 3.22414 | 0.7229 | 1.94489 |
| 376.61352 | 1.02031 | 3.15967 | 1.06331 | 3.2286 | 0.72855 | 1.94935 |
| 377.12895 | 1.02627 | 3.16339 | 1.07351 | 3.23291 | 0.73429 | 1.95371 |
| 377.65731 | 1.03215 | 3.16726 | 1.08362 | 3.2371 | 0.74012 | 1.958 |
| 378.17561 | 1.03797 | 3.17132 | 1.09367 | 3.24119 | 0.74601 | 1.96217 |
| 378.7069 | 1.04377 | 3.1756 | 1.10364 | 3.24523 | 0.75199 | 1.96626 |
| 379.22809 | 1.04959 | 3.1801 | 1.11353 | 3.24921 | 0.75802 | 1.97028 |
| 379.76234 | 1.05546 | 3.18486 | 1.12337 | 3.25319 | 0.76411 | 1.9742 |
| 380.28644 | 1.06143 | 3.18983 | 1.13318 | 3.25717 | 0.77026 | 1.97803 |
| 380.82368 | 1.06756 | 3.19505 | 1.14295 | 3.26117 | 0.77645 | 1.98178 |
| 381.36245 | 1.07385 | 3.20051 | 1.15273 | 3.26521 | 0.78272 | 1.98544 |
| 381.89098 | 1.08038 | 3.20614 | 1.16252 | 3.26927 | 0.78906 | 1.989 |
| 382.43277 | 1.08719 | 3.21196 | 1.17236 | 3.27338 | 0.79545 | 1.99247 |
| 382.96427 | 1.09429 | 3.2179 | 1.1823 | 3.27752 | 0.80191 | 1.99581 |
| 383.50911 | 1.10173 | 3.22394 | 1.1923 | 3.28169 | 0.80839 | 1.99905 |
| 384.04361 | 1.10951 | 3.23002 | 1.20242 | 3.28587 | 0.81495 | 2.00216 |
| 384.59153 | 1.11766 | 3.2361 | 1.21267 | 3.29002 | 0.82154 | 2.00513 |
| 385.12905 | 1.12617 | 3.24214 | 1.22305 | 3.29418 | 0.82815 | 2.00797 |
| 385.68007 | 1.13506 | 3.24807 | 1.23359 | 3.29829 | 0.83479 | 2.01062 |
| 386.22064 | 1.14432 | 3.25385 | 1.24429 | 3.30236 | 0.84143 | 2.01313 |
| 386.7748 | 1.15391 | 3.25943 | 1.25515 | 3.30633 | 0.84804 | 2.01546 |
| 387.31844 | 1.16382 | 3.26478 | 1.26618 | 3.3102 | 0.85463 | 2.0176 |
| 387.87575 | 1.17402 | 3.26982 | 1.27736 | 3.31395 | 0.86114 | 2.01959 |
| 388.43467 | 1.18449 | 3.27454 | 1.28872 | 3.31756 | 0.86757 | 2.0214 |
| 388.983 | 1.19517 | 3.27891 | 1.30023 | 3.32099 | 0.87391 | 2.02304 |
| 389.54511 | 1.20602 | 3.28289 | 1.31188 | 3.32425 | 0.88009 | 2.02456 |
| 390.09658 | 1.21699 | 3.28647 | 1.32367 | 3.3273 | 0.88614 | 2.02592 |
| 390.66192 | 1.22803 | 3.28965 | 1.3356 | 3.33011 | 0.892 | 2.02718 |
| 391.21656 | 1.23911 | 3.2924 | 1.34765 | 3.33268 | 0.89768 | 2.02833 |
| 391.78515 | 1.25015 | 3.29475 | 1.35979 | 3.33497 | 0.90318 | 2.02944 |
| 392.34298 | 1.26112 | 3.2967 | 1.37201 | 3.33697 | 0.90845 | 2.03049 |
| 392.91486 | 1.27197 | 3.29827 | 1.38428 | 3.33866 | 0.91352 | 2.03153 |
| 393.47592 | 1.28266 | 3.2995 | 1.39658 | 3.34002 | 0.91836 | 2.03258 |
| 394.0511 | 1.29317 | 3.30042 | 1.40888 | 3.34102 | 0.92299 | 2.03367 |
| 394.61541 | 1.30346 | 3.30105 | 1.42113 | 3.34166 | 0.92741 | 2.03482 |
| 395.19393 | 1.31354 | 3.30142 | 1.43329 | 3.34192 | 0.93162 | 2.03608 |
| 395.77415 | 1.32338 | 3.30159 | 1.44533 | 3.34179 | 0.93563 | 2.03745 |
| 396.34341 | 1.33299 | 3.30157 | 1.45718 | 3.34128 | 0.93947 | 2.03897 |
| 396.92702 | 1.34236 | 3.3014 | 1.46879 | 3.34041 | 0.94313 | 2.04066 |
| 397.4996 | 1.3515 | 3.3011 | 1.4801 | 3.33919 | 0.94663 | 2.04255 |
| 398.08662 | 1.36043 | 3.30068 | 1.49107 | 3.33765 | 0.95002 | 2.04469 |
| 398.66255 | 1.36916 | 3.30015 | 1.50162 | 3.33583 | 0.95331 | 2.04702 |
| 399.25301 | 1.37769 | 3.29954 | 1.51172 | 3.33379 | 0.95651 | 2.04964 |
| 399.83233 | 1.38605 | 3.29884 | 1.52133 | 3.3316 | 0.95967 | 2.05253 |
| 400.42626 | 1.39423 | 3.29803 | 1.53042 | 3.32932 | 0.96284 | 2.05569 |
| 401.00899 | 1.40223 | 3.29711 | 1.53898 | 3.32704 | 0.96603 | 2.05915 |
| 401.60643 | 1.41005 | 3.29609 | 1.54701 | 3.32484 | 0.96928 | 2.06291 |
| 402.1926 | 1.4177 | 3.29495 | 1.55452 | 3.3228 | 0.97265 | 2.06694 |
| 402.79357 | 1.42515 | 3.29368 | 1.56153 | 3.32101 | 0.97617 | 2.07126 |
| 403.39634 | 1.43239 | 3.29227 | 1.56811 | 3.31954 | 0.97986 | 2.07582 |
| 403.98775 | 1.43937 | 3.29071 | 1.57432 | 3.31846 | 0.98379 | 2.08063 |
| 404.5941 | 1.4461 | 3.28903 | 1.5802 | 3.31781 | 0.98795 | 2.08563 |
| 405.18903 | 1.45252 | 3.28721 | 1.58586 | 3.31763 | 0.99239 | 2.09082 |
| 405.799 | 1.45862 | 3.28527 | 1.59137 | 3.31796 | 0.99712 | 2.09613 |
| 406.39748 | 1.46436 | 3.28324 | 1.59681 | 3.3188 | 1.00215 | 2.10153 |
| 407.01109 | 1.46971 | 3.28113 | 1.60228 | 3.32015 | 1.0075 | 2.107 |
| 407.61316 | 1.47463 | 3.279 | 1.60783 | 3.32196 | 1.01314 | 2.1125 |
| 408.23045 | 1.4791 | 3.27688 | 1.61354 | 3.32423 | 1.01909 | 2.11796 |
| 408.83614 | 1.48313 | 3.27481 | 1.61948 | 3.32692 | 1.02536 | 2.12341 |
| 409.45714 | 1.48669 | 3.27284 | 1.62571 | 3.32996 | 1.03187 | 2.12877 |
| 410.08003 | 1.48979 | 3.271 | 1.63225 | 3.33331 | 1.03866 | 2.13404 |
| 410.69122 | 1.49241 | 3.26938 | 1.63914 | 3.3369 | 1.04569 | 2.1392 |
| 411.31788 | 1.4946 | 3.268 | 1.6464 | 3.34068 | 1.05295 | 2.1442 |
| 411.93276 | 1.49635 | 3.26691 | 1.65403 | 3.34458 | 1.06042 | 2.14909 |
| 412.56322 | 1.49769 | 3.26614 | 1.66206 | 3.34856 | 1.06808 | 2.15381 |
| 413.18183 | 1.49863 | 3.26575 | 1.67044 | 3.35256 | 1.07591 | 2.15835 |
| 413.81612 | 1.49921 | 3.26575 | 1.67918 | 3.35654 | 1.08391 | 2.16272 |
| 414.4385 | 1.49947 | 3.26619 | 1.68827 | 3.36045 | 1.09206 | 2.16691 |
| 415.07666 | 1.49941 | 3.2671 | 1.69767 | 3.36426 | 1.10031 | 2.17089 |
| 415.70284 | 1.49907 | 3.2685 | 1.70738 | 3.36794 | 1.1087 | 2.17467 |
| 416.34489 | 1.49848 | 3.27042 | 1.71736 | 3.37144 | 1.11713 | 2.17825 |
| 416.97491 | 1.49769 | 3.27288 | 1.72761 | 3.37478 | 1.12564 | 2.1816 |
| 417.62091 | 1.49671 | 3.27592 | 1.73808 | 3.37787 | 1.13419 | 2.18474 |
| 418.26891 | 1.49559 | 3.27954 | 1.74874 | 3.38074 | 1.14273 | 2.18765 |
| 418.90477 | 1.49437 | 3.2838 | 1.75957 | 3.38333 | 1.15126 | 2.19039 |
| 419.55676 | 1.4931 | 3.28869 | 1.77053 | 3.38564 | 1.15972 | 2.19293 |
| 420.19654 | 1.49182 | 3.29423 | 1.78157 | 3.38765 | 1.16812 | 2.19532 |
| 420.85257 | 1.49057 | 3.30044 | 1.79267 | 3.38936 | 1.17644 | 2.19757 |
| 421.49631 | 1.48942 | 3.30733 | 1.80376 | 3.39076 | 1.18468 | 2.19972 |
| 422.1564 | 1.48841 | 3.31492 | 1.81479 | 3.39185 | 1.19278 | 2.20178 |
| 422.80415 | 1.48762 | 3.32319 | 1.82571 | 3.39264 | 1.20083 | 2.20381 |
| 423.46834 | 1.48708 | 3.33216 | 1.83649 | 3.39318 | 1.20876 | 2.20581 |
| 424.12012 | 1.48689 | 3.34182 | 1.84707 | 3.39349 | 1.21665 | 2.20786 |
| 424.78846 | 1.48709 | 3.35212 | 1.85742 | 3.39361 | 1.22448 | 2.20992 |
| 425.44431 | 1.48774 | 3.36308 | 1.86748 | 3.39358 | 1.23232 | 2.21204 |
| 426.11684 | 1.48893 | 3.37464 | 1.87727 | 3.39347 | 1.24017 | 2.21421 |
| 426.79149 | 1.49069 | 3.38676 | 1.88675 | 3.39335 | 1.24809 | 2.21642 |
| 427.45355 | 1.49308 | 3.39941 | 1.89593 | 3.39327 | 1.2561 | 2.21869 |
| 428.13244 | 1.49617 | 3.41252 | 1.90482 | 3.39329 | 1.26422 | 2.22098 |
| 428.79867 | 1.49999 | 3.42606 | 1.91344 | 3.39347 | 1.27249 | 2.22325 |
| 429.48185 | 1.50458 | 3.43992 | 1.92181 | 3.39388 | 1.28091 | 2.22549 |
| 430.15229 | 1.50998 | 3.45406 | 1.93 | 3.39457 | 1.28948 | 2.22764 |
| 430.83979 | 1.51619 | 3.46839 | 1.93802 | 3.39558 | 1.29822 | 2.2297 |
| 431.51448 | 1.52326 | 3.48285 | 1.94597 | 3.39694 | 1.30713 | 2.23161 |
| 432.20634 | 1.53117 | 3.49735 | 1.9539 | 3.39871 | 1.31615 | 2.23333 |
| 432.88532 | 1.53993 | 3.51182 | 1.96189 | 3.40087 | 1.32529 | 2.23486 |
| 433.58159 | 1.54951 | 3.52618 | 1.97 | 3.40345 | 1.33452 | 2.23617 |
| 434.2649 | 1.5599 | 3.54036 | 1.97832 | 3.40644 | 1.34381 | 2.23722 |
| 434.96562 | 1.57106 | 3.55428 | 1.98692 | 3.40982 | 1.35309 | 2.23802 |
| 435.66861 | 1.58298 | 3.5679 | 1.99588 | 3.41355 | 1.36236 | 2.23858 |
| 436.35852 | 1.59559 | 3.58113 | 2.00528 | 3.41761 | 1.37158 | 2.23891 |
| 437.06602 | 1.60885 | 3.59394 | 2.01517 | 3.42192 | 1.38071 | 2.23899 |
| 437.76036 | 1.6227 | 3.60625 | 2.02561 | 3.42643 | 1.38973 | 2.23885 |
| 438.47242 | 1.63708 | 3.61806 | 2.03666 | 3.43103 | 1.39862 | 2.23853 |
| 439.17124 | 1.65193 | 3.62931 | 2.04834 | 3.43568 | 1.40735 | 2.23804 |
| 439.8879 | 1.66717 | 3.64 | 2.06068 | 3.44025 | 1.41592 | 2.23742 |
| 440.59125 | 1.68276 | 3.65008 | 2.0737 | 3.44467 | 1.42431 | 2.23666 |
| 441.31255 | 1.6986 | 3.65958 | 2.08736 | 3.44882 | 1.43253 | 2.23581 |
| 442.02046 | 1.71464 | 3.66849 | 2.10165 | 3.45263 | 1.44059 | 2.23488 |
| 442.74646 | 1.73082 | 3.67681 | 2.11653 | 3.45598 | 1.44846 | 2.23389 |
| 443.47484 | 1.74705 | 3.68459 | 2.13195 | 3.4588 | 1.45617 | 2.23288 |
| 444.18971 | 1.7633 | 3.69183 | 2.14783 | 3.46102 | 1.46371 | 2.23183 |
| 444.92286 | 1.7795 | 3.6986 | 2.1641 | 3.46257 | 1.4711 | 2.23077 |
| 445.64241 | 1.7956 | 3.70491 | 2.18066 | 3.46342 | 1.47834 | 2.22973 |
| 446.38036 | 1.8116 | 3.71085 | 2.19743 | 3.46352 | 1.48543 | 2.22872 |
| 447.10464 | 1.82743 | 3.71645 | 2.2143 | 3.46288 | 1.4924 | 2.22772 |
| 447.84744 | 1.8431 | 3.7218 | 2.23118 | 3.46148 | 1.49922 | 2.22679 |
| 448.57649 | 1.85861 | 3.72693 | 2.24801 | 3.45935 | 1.50596 | 2.22589 |
| 449.3242 | 1.87396 | 3.73193 | 2.26469 | 3.45652 | 1.51261 | 2.22506 |
| 450.05807 | 1.8892 | 3.73684 | 2.28117 | 3.45303 | 1.51916 | 2.22429 |
| 450.81073 | 1.90436 | 3.74171 | 2.29738 | 3.44891 | 1.52565 | 2.2236 |
| 451.54947 | 1.91948 | 3.74657 | 2.31329 | 3.4442 | 1.5321 | 2.22296 |
| 452.30713 | 1.93462 | 3.75143 | 2.32888 | 3.43895 | 1.53852 | 2.22237 |
| 453.06734 | 1.94983 | 3.75632 | 2.34409 | 3.4332 | 1.54491 | 2.22184 |
| 453.8135 | 1.9652 | 3.76121 | 2.35892 | 3.42697 | 1.5513 | 2.22133 |
| 454.57878 | 1.98077 | 3.76609 | 2.37335 | 3.42031 | 1.55766 | 2.22086 |
| 455.32993 | 1.99657 | 3.77091 | 2.38735 | 3.4132 | 1.56403 | 2.22036 |
| 456.10034 | 2.01265 | 3.77562 | 2.4009 | 3.4057 | 1.57036 | 2.21985 |
| 456.85653 | 2.02905 | 3.78014 | 2.41396 | 3.39782 | 1.57665 | 2.21929 |
| 457.63212 | 2.04574 | 3.78442 | 2.42649 | 3.38958 | 1.5829 | 2.21871 |
| 458.39341 | 2.06274 | 3.78838 | 2.43847 | 3.38101 | 1.58908 | 2.21808 |
| 459.17423 | 2.08001 | 3.79196 | 2.44986 | 3.37215 | 1.59515 | 2.21741 |
| 459.94065 | 2.0975 | 3.79509 | 2.4606 | 3.36306 | 1.60109 | 2.21668 |
| 460.72676 | 2.11515 | 3.7977 | 2.47068 | 3.35375 | 1.60689 | 2.21596 |
| 461.49838 | 2.13288 | 3.79979 | 2.48005 | 3.34433 | 1.6125 | 2.21523 |
| 462.28983 | 2.15062 | 3.80131 | 2.48869 | 3.33484 | 1.61792 | 2.21454 |
| 463.08399 | 2.16829 | 3.80228 | 2.4966 | 3.32538 | 1.62312 | 2.21391 |
| 463.86353 | 2.18579 | 3.80268 | 2.50377 | 3.31598 | 1.62812 | 2.21341 |
| 464.66312 | 2.20302 | 3.80258 | 2.5102 | 3.30677 | 1.63292 | 2.21303 |
| 465.44799 | 2.21993 | 3.80201 | 2.51591 | 3.29779 | 1.63751 | 2.21288 |
| 466.25306 | 2.23645 | 3.80104 | 2.52093 | 3.28912 | 1.64193 | 2.21295 |
| 467.04331 | 2.25253 | 3.79976 | 2.52529 | 3.28083 | 1.64619 | 2.21329 |
| 467.85391 | 2.26813 | 3.79825 | 2.52902 | 3.27299 | 1.65035 | 2.21395 |
| 468.64961 | 2.28325 | 3.7966 | 2.53218 | 3.26566 | 1.65445 | 2.21493 |
| 469.46579 | 2.2979 | 3.7949 | 2.53483 | 3.25889 | 1.65855 | 2.21628 |
| 470.26699 | 2.31208 | 3.79323 | 2.53701 | 3.25273 | 1.66267 | 2.21797 |
| 471.08882 | 2.32585 | 3.79169 | 2.53879 | 3.24722 | 1.6669 | 2.22001 |
| 471.89557 | 2.33925 | 3.79032 | 2.54022 | 3.24239 | 1.67125 | 2.22241 |
| 472.72311 | 2.35234 | 3.78918 | 2.54138 | 3.2383 | 1.6758 | 2.22511 |
| 473.55356 | 2.36521 | 3.78834 | 2.54234 | 3.23495 | 1.68059 | 2.22811 |
| 474.36878 | 2.37791 | 3.78779 | 2.54318 | 3.23237 | 1.68566 | 2.23135 |
| 475.20503 | 2.39052 | 3.78757 | 2.54397 | 3.23058 | 1.691 | 2.23481 |
| 476.02595 | 2.40312 | 3.78765 | 2.54479 | 3.22959 | 1.69665 | 2.23842 |
| 476.86805 | 2.41578 | 3.78803 | 2.54573 | 3.22937 | 1.70263 | 2.24215 |
| 477.69474 | 2.42855 | 3.78869 | 2.54688 | 3.22994 | 1.70892 | 2.24595 |
| 478.54276 | 2.44147 | 3.78958 | 2.54829 | 3.23124 | 1.7155 | 2.24978 |
| 479.37527 | 2.45461 | 3.79067 | 2.5501 | 3.23327 | 1.72236 | 2.25362 |
| 480.22927 | 2.46799 | 3.79192 | 2.55233 | 3.23597 | 1.7295 | 2.25745 |
| 481.06766 | 2.48162 | 3.79327 | 2.55508 | 3.23929 | 1.73686 | 2.26121 |
| 481.92771 | 2.49553 | 3.7947 | 2.55841 | 3.24317 | 1.74442 | 2.26493 |
| 482.79084 | 2.50973 | 3.79615 | 2.56238 | 3.24753 | 1.75218 | 2.2686 |
| 483.63821 | 2.52421 | 3.7976 | 2.56702 | 3.25231 | 1.7601 | 2.27219 |
| 484.50748 | 2.53899 | 3.79899 | 2.5724 | 3.25743 | 1.76816 | 2.27576 |
| 485.36089 | 2.55406 | 3.80029 | 2.57852 | 3.26278 | 1.77635 | 2.27928 |
| 486.23637 | 2.56939 | 3.80148 | 2.58541 | 3.26831 | 1.78467 | 2.2828 |
| 487.09589 | 2.585 | 3.80254 | 2.59307 | 3.2739 | 1.79312 | 2.2863 |
| 487.97765 | 2.60086 | 3.80342 | 2.60151 | 3.27949 | 1.80168 | 2.28981 |
| 488.84333 | 2.61697 | 3.80411 | 2.61069 | 3.28498 | 1.81037 | 2.29335 |
| 489.73144 | 2.63333 | 3.80459 | 2.62061 | 3.29029 | 1.81921 | 2.2969 |
| 490.60336 | 2.64991 | 3.80483 | 2.63124 | 3.29533 | 1.82823 | 2.30048 |
| 491.49788 | 2.66671 | 3.80482 | 2.64252 | 3.30005 | 1.83741 | 2.30408 |
| 492.37611 | 2.68371 | 3.80451 | 2.65442 | 3.30435 | 1.84678 | 2.30772 |
| 493.27711 | 2.70091 | 3.8039 | 2.66688 | 3.30819 | 1.85636 | 2.31135 |
| 494.18141 | 2.71828 | 3.80295 | 2.67982 | 3.3115 | 1.86615 | 2.315 |
| 495.06927 | 2.73581 | 3.80163 | 2.69316 | 3.31421 | 1.87615 | 2.31863 |
| 495.98016 | 2.75347 | 3.79992 | 2.70682 | 3.31631 | 1.88639 | 2.32221 |
| 496.8745 | 2.77121 | 3.79778 | 2.72071 | 3.31775 | 1.89682 | 2.32576 |
| 497.79205 | 2.78901 | 3.79519 | 2.73473 | 3.31853 | 1.90748 | 2.32922 |
| 498.69294 | 2.80682 | 3.79213 | 2.74877 | 3.31867 | 1.91834 | 2.33264 |
| 499.61723 | 2.82456 | 3.78859 | 2.76273 | 3.31816 | 1.92937 | 2.33597 |
| 500.52474 | 2.8422 | 3.78457 | 2.77652 | 3.31706 | 1.94059 | 2.33923 |
| 501.45584 | 2.85966 | 3.78008 | 2.79005 | 3.31544 | 1.95197 | 2.34243 |
| 502.37005 | 2.87689 | 3.77513 | 2.80324 | 3.31338 | 1.9635 | 2.34558 |
| 503.30803 | 2.89383 | 3.76977 | 2.81603 | 3.31096 | 1.97521 | 2.34869 |
| 504.22902 | 2.91042 | 3.76403 | 2.82839 | 3.30828 | 1.98707 | 2.35178 |
| 505.17396 | 2.92662 | 3.75798 | 2.84031 | 3.30547 | 1.9991 | 2.35486 |
| 506.12245 | 2.94241 | 3.75168 | 2.85179 | 3.30263 | 2.01134 | 2.35796 |
| 507.05377 | 2.95777 | 3.74518 | 2.86286 | 3.29988 | 2.0238 | 2.36108 |
| 508.00934 | 2.97268 | 3.73859 | 2.8736 | 3.29729 | 2.0365 | 2.36422 |
| 508.94763 | 2.98718 | 3.73195 | 2.88409 | 3.29496 | 2.04951 | 2.36738 |
| 509.91035 | 3.00127 | 3.72531 | 2.8944 | 3.29293 | 2.06282 | 2.37057 |
| 510.85568 | 3.01499 | 3.71875 | 2.90466 | 3.29124 | 2.07649 | 2.37374 |
| 511.82565 | 3.0284 | 3.71231 | 2.91497 | 3.28987 | 2.09057 | 2.37691 |
| 512.7781 | 3.04154 | 3.706 | 2.92545 | 3.28883 | 2.10508 | 2.38001 |
| 513.75539 | 3.05445 | 3.69987 | 2.93618 | 3.28805 | 2.12003 | 2.38303 |
| 514.71504 | 3.06719 | 3.6939 | 2.94723 | 3.28746 | 2.13548 | 2.38591 |
| 515.69973 | 3.07982 | 3.6881 | 2.95867 | 3.28696 | 2.15143 | 2.38859 |
| 516.66667 | 3.09238 | 3.68246 | 2.97052 | 3.28648 | 2.1679 | 2.39105 |
| 517.65885 | 3.10489 | 3.67696 | 2.98279 | 3.2859 | 2.18488 | 2.3932 |
| 518.65484 | 3.11739 | 3.67157 | 2.99546 | 3.28514 | 2.2024 | 2.39501 |
| 519.6329 | 3.12988 | 3.66627 | 3.00849 | 3.28411 | 2.2204 | 2.39639 |
| 520.63652 | 3.1424 | 3.66104 | 3.0218 | 3.28276 | 2.23893 | 2.39731 |
| 521.62208 | 3.15493 | 3.65586 | 3.03535 | 3.281 | 2.25789 | 2.3977 |
| 522.6334 | 3.1675 | 3.6507 | 3.04904 | 3.27885 | 2.2773 | 2.39751 |
| 523.62654 | 3.18009 | 3.64557 | 3.06281 | 3.27628 | 2.29708 | 2.3967 |
| 524.64565 | 3.19272 | 3.64044 | 3.07657 | 3.27332 | 2.31722 | 2.3952 |
| 525.64646 | 3.20538 | 3.63532 | 3.09028 | 3.26998 | 2.33766 | 2.393 |
| 526.67346 | 3.21808 | 3.63019 | 3.10388 | 3.2663 | 2.35832 | 2.39005 |
| 527.68203 | 3.23086 | 3.62503 | 3.11733 | 3.26235 | 2.37916 | 2.38634 |
| 528.71701 | 3.24369 | 3.61984 | 3.13061 | 3.25816 | 2.40014 | 2.38184 |
| 529.73342 | 3.25662 | 3.61458 | 3.14373 | 3.25379 | 2.42119 | 2.37654 |
| 530.77647 | 3.26962 | 3.60923 | 3.1567 | 3.24927 | 2.44222 | 2.37043 |
| 531.82364 | 3.28272 | 3.60374 | 3.16952 | 3.24464 | 2.46319 | 2.36352 |
| 532.85205 | 3.29591 | 3.59808 | 3.18224 | 3.23993 | 2.48404 | 2.35582 |
| 533.90743 | 3.30916 | 3.59222 | 3.19486 | 3.23515 | 2.50473 | 2.34734 |
| 534.94392 | 3.32243 | 3.58608 | 3.20742 | 3.23032 | 2.52518 | 2.33809 |
| 536.00761 | 3.33569 | 3.57964 | 3.21995 | 3.22541 | 2.54536 | 2.3281 |
| 537.05228 | 3.34886 | 3.57288 | 3.23246 | 3.22043 | 2.56522 | 2.3174 |
| 538.12438 | 3.36189 | 3.56578 | 3.24497 | 3.21536 | 2.58472 | 2.30601 |
| 539.17732 | 3.37467 | 3.55835 | 3.25751 | 3.21018 | 2.60383 | 2.29397 |
| 540.25793 | 3.38715 | 3.55062 | 3.27006 | 3.20487 | 2.6225 | 2.2813 |
| 541.31925 | 3.39925 | 3.54264 | 3.28262 | 3.19941 | 2.64071 | 2.26803 |
| 542.40847 | 3.41091 | 3.53447 | 3.29521 | 3.19379 | 2.65844 | 2.2542 |
| 543.50208 | 3.42207 | 3.5262 | 3.30779 | 3.18797 | 2.67566 | 2.23984 |
| 544.5762 | 3.43273 | 3.51792 | 3.32038 | 3.18195 | 2.69235 | 2.22499 |
| 545.67858 | 3.44286 | 3.50973 | 3.33294 | 3.17571 | 2.7085 | 2.20965 |
| 546.76132 | 3.45251 | 3.50173 | 3.34548 | 3.16922 | 2.72407 | 2.19389 |
| 547.87258 | 3.46172 | 3.49402 | 3.35796 | 3.16247 | 2.73907 | 2.17771 |
| 548.96405 | 3.47054 | 3.48666 | 3.37036 | 3.15545 | 2.75346 | 2.16115 |
| 550.08429 | 3.47908 | 3.47973 | 3.38265 | 3.14815 | 2.76726 | 2.14423 |
| 551.1846 | 3.48743 | 3.47323 | 3.39482 | 3.14055 | 2.78042 | 2.12698 |
| 552.31393 | 3.49566 | 3.46721 | 3.40681 | 3.13263 | 2.79295 | 2.10942 |
| 553.42319 | 3.5039 | 3.46164 | 3.41859 | 3.12442 | 2.8048 | 2.09158 |
| 554.56172 | 3.51222 | 3.45647 | 3.43012 | 3.11588 | 2.81598 | 2.07349 |
| 555.68004 | 3.52069 | 3.45168 | 3.44134 | 3.10703 | 2.82645 | 2.05517 |
| 556.82788 | 3.52938 | 3.44718 | 3.45219 | 3.09789 | 2.83618 | 2.03667 |
| 557.98047 | 3.53831 | 3.44288 | 3.46262 | 3.08847 | 2.84516 | 2.01802 |
| 559.11263 | 3.5475 | 3.43873 | 3.47257 | 3.07883 | 2.85334 | 1.99929 |
| 560.27472 | 3.55694 | 3.43464 | 3.48198 | 3.06897 | 2.86073 | 1.98051 |
| 561.41622 | 3.5666 | 3.43053 | 3.49078 | 3.05901 | 2.86731 | 1.96175 |
| 562.5879 | 3.57645 | 3.42635 | 3.49895 | 3.049 | 2.87306 | 1.94308 |
| 563.73886 | 3.58641 | 3.42206 | 3.50642 | 3.03903 | 2.87798 | 1.9246 |
| 564.92027 | 3.59643 | 3.41763 | 3.51319 | 3.0292 | 2.88209 | 1.90634 |
| 566.0808 | 3.60644 | 3.41303 | 3.51925 | 3.01964 | 2.88541 | 1.88841 |
| 567.27206 | 3.61637 | 3.4083 | 3.5246 | 3.01044 | 2.88798 | 1.87089 |
| 568.44228 | 3.62614 | 3.40345 | 3.52928 | 3.00174 | 2.88983 | 1.85383 |
| 569.64351 | 3.63572 | 3.39853 | 3.53335 | 2.99366 | 2.89102 | 1.83734 |
| 570.82355 | 3.64505 | 3.39356 | 3.53691 | 2.98629 | 2.89164 | 1.82144 |
| 572.03488 | 3.65408 | 3.38863 | 3.54004 | 2.97976 | 2.89177 | 1.80621 |
| 573.25135 | 3.6628 | 3.38379 | 3.54286 | 2.97412 | 2.89147 | 1.79168 |
| 574.4464 | 3.67121 | 3.37912 | 3.54552 | 2.96943 | 2.89087 | 1.77789 |
| 575.67317 | 3.67926 | 3.37469 | 3.54816 | 2.96575 | 2.89004 | 1.76484 |
| 576.87834 | 3.68699 | 3.37058 | 3.55094 | 2.96306 | 2.88912 | 1.75251 |
| 578.11553 | 3.69442 | 3.36686 | 3.554 | 2.96137 | 2.88816 | 1.7409 |
| 579.33097 | 3.70158 | 3.36362 | 3.5575 | 2.96061 | 2.88729 | 1.72998 |
| 580.57871 | 3.70851 | 3.36092 | 3.56157 | 2.96072 | 2.88658 | 1.7197 |
| 581.80453 | 3.71525 | 3.35884 | 3.56633 | 2.9616 | 2.88614 | 1.70997 |
| 583.06296 | 3.7219 | 3.35746 | 3.57189 | 2.96317 | 2.88598 | 1.70074 |
| 584.29931 | 3.72852 | 3.35682 | 3.57829 | 2.96528 | 2.88622 | 1.6919 |
| 585.56857 | 3.73521 | 3.35699 | 3.58565 | 2.96782 | 2.88684 | 1.6834 |
| 586.81558 | 3.74208 | 3.35801 | 3.59395 | 2.97067 | 2.88788 | 1.67509 |
| 588.0958 | 3.74924 | 3.3599 | 3.60323 | 2.97369 | 2.88934 | 1.66692 |
| 589.38162 | 3.75683 | 3.36265 | 3.61347 | 2.97678 | 2.89119 | 1.65876 |
| 590.64495 | 3.76495 | 3.36628 | 3.62465 | 2.97983 | 2.89341 | 1.65056 |
| 591.94195 | 3.77374 | 3.37074 | 3.63675 | 2.98276 | 2.89597 | 1.64221 |
| 593.21628 | 3.78332 | 3.37599 | 3.64972 | 2.98546 | 2.89877 | 1.63367 |
| 594.52462 | 3.7938 | 3.38199 | 3.66354 | 2.98789 | 2.90178 | 1.6249 |
| 595.81011 | 3.80531 | 3.38864 | 3.67816 | 2.98996 | 2.9049 | 1.61584 |
| 597.12992 | 3.81793 | 3.39585 | 3.69353 | 2.99163 | 2.90806 | 1.60646 |
| 598.42672 | 3.83177 | 3.40355 | 3.70963 | 2.99286 | 2.91121 | 1.59679 |
| 599.75816 | 3.84689 | 3.4116 | 3.72641 | 2.99359 | 2.91426 | 1.58682 |
| 601.06641 | 3.86339 | 3.41988 | 3.74384 | 2.99378 | 2.91714 | 1.57658 |
| 602.40964 | 3.88131 | 3.42828 | 3.76189 | 2.99338 | 2.9198 | 1.56606 |
| 603.75889 | 3.90071 | 3.43664 | 3.7805 | 2.99233 | 2.92219 | 1.55532 |
| 605.08466 | 3.92161 | 3.44482 | 3.79964 | 2.99058 | 2.92427 | 1.54439 |
| 606.44593 | 3.94402 | 3.45267 | 3.81926 | 2.9881 | 2.92597 | 1.53332 |
| 607.78355 | 3.96795 | 3.46002 | 3.83928 | 2.98483 | 2.92728 | 1.52216 |
| 609.15701 | 3.99338 | 3.46671 | 3.85963 | 2.98075 | 2.92818 | 1.51094 |
| 610.50662 | 4.02024 | 3.47259 | 3.88024 | 2.97582 | 2.92863 | 1.49975 |
| 611.89243 | 4.04847 | 3.4775 | 3.90103 | 2.97004 | 2.92862 | 1.4886 |
| 613.2542 | 4.07798 | 3.4813 | 3.9219 | 2.9634 | 2.92815 | 1.47759 |
| 614.65252 | 4.10865 | 3.48386 | 3.9428 | 2.95592 | 2.92721 | 1.46675 |
| 616.02663 | 4.14036 | 3.48509 | 3.96364 | 2.94765 | 2.92582 | 1.45616 |
| 617.43763 | 4.17299 | 3.48491 | 3.98437 | 2.93862 | 2.92398 | 1.44587 |
| 618.82423 | 4.20638 | 3.48327 | 4.00495 | 2.92889 | 2.92171 | 1.43596 |
| 620.2481 | 4.24042 | 3.48011 | 4.02535 | 2.91849 | 2.91905 | 1.42648 |
| 621.67853 | 4.27498 | 3.47545 | 4.04558 | 2.90748 | 2.91605 | 1.41748 |
| 623.08427 | 4.30995 | 3.46927 | 4.06566 | 2.89589 | 2.91275 | 1.40905 |
| 624.52783 | 4.34524 | 3.46159 | 4.08557 | 2.88375 | 2.90923 | 1.40118 |
| 625.94649 | 4.38079 | 3.45242 | 4.10537 | 2.87104 | 2.90555 | 1.39395 |
| 627.40336 | 4.41652 | 3.44177 | 4.12508 | 2.85776 | 2.90179 | 1.38737 |
| 628.83513 | 4.45242 | 3.42962 | 4.1447 | 2.84386 | 2.89802 | 1.38146 |
| 630.30549 | 4.48844 | 3.41595 | 4.16423 | 2.8293 | 2.89434 | 1.37622 |
| 631.75056 | 4.52454 | 3.40071 | 4.18366 | 2.81399 | 2.89082 | 1.37162 |
| 633.2346 | 4.56066 | 3.38383 | 4.20294 | 2.7979 | 2.88752 | 1.36766 |
| 634.69315 | 4.59673 | 3.36523 | 4.222 | 2.78093 | 2.88456 | 1.36428 |
| 636.19106 | 4.63265 | 3.34482 | 4.24076 | 2.76307 | 2.88196 | 1.36147 |
| 637.66327 | 4.66827 | 3.32251 | 4.25909 | 2.74425 | 2.8798 | 1.35917 |
| 639.17526 | 4.70342 | 3.29821 | 4.2769 | 2.72445 | 2.87812 | 1.35731 |
| 640.69443 | 4.73789 | 3.27187 | 4.29401 | 2.70371 | 2.87698 | 1.35583 |
| 642.18758 | 4.77143 | 3.24347 | 4.31032 | 2.68204 | 2.8764 | 1.3547 |
| 643.72112 | 4.8038 | 3.21302 | 4.32568 | 2.65951 | 2.87639 | 1.35382 |
| 645.22843 | 4.8347 | 3.1806 | 4.33996 | 2.63622 | 2.87699 | 1.35313 |
| 646.77655 | 4.86386 | 3.14634 | 4.35305 | 2.61227 | 2.87819 | 1.35259 |
| 648.29822 | 4.89103 | 3.11041 | 4.36485 | 2.5878 | 2.88001 | 1.35213 |
| 649.86112 | 4.91598 | 3.07306 | 4.37529 | 2.56295 | 2.88246 | 1.35169 |
| 651.39735 | 4.93851 | 3.03456 | 4.38432 | 2.53789 | 2.88552 | 1.35123 |
| 652.97525 | 4.95848 | 2.99521 | 4.39192 | 2.51278 | 2.88918 | 1.35068 |
| 654.52626 | 4.97581 | 2.95538 | 4.39808 | 2.48781 | 2.89345 | 1.34998 |
| 656.11937 | 4.99047 | 2.91539 | 4.40283 | 2.46314 | 2.8983 | 1.34908 |
| 657.68537 | 5.00248 | 2.87559 | 4.40622 | 2.43894 | 2.90374 | 1.34793 |
| 659.29392 | 5.01196 | 2.83634 | 4.40835 | 2.41535 | 2.90973 | 1.34648 |
| 660.91035 | 5.01901 | 2.79792 | 4.40929 | 2.39253 | 2.91625 | 1.34467 |
| 662.49933 | 5.02386 | 2.76063 | 4.40916 | 2.37059 | 2.92328 | 1.34245 |
| 664.13154 | 5.0267 | 2.72471 | 4.40812 | 2.34964 | 2.93077 | 1.33975 |
| 665.73607 | 5.02782 | 2.69034 | 4.40629 | 2.32976 | 2.93873 | 1.33653 |
| 667.38428 | 5.02745 | 2.65769 | 4.40383 | 2.31099 | 2.94705 | 1.33274 |
| 669.00459 | 5.0259 | 2.62687 | 4.4009 | 2.29337 | 2.95573 | 1.32832 |
| 670.66905 | 5.02344 | 2.59792 | 4.39765 | 2.27691 | 2.96466 | 1.32322 |
| 672.30536 | 5.02036 | 2.57089 | 4.39421 | 2.26159 | 2.97381 | 1.3174 |
| 673.9863 | 5.01693 | 2.54575 | 4.39071 | 2.24738 | 2.98308 | 1.31083 |
| 675.63886 | 5.01341 | 2.52247 | 4.38728 | 2.23424 | 2.99242 | 1.30348 |
| 677.33654 | 5.01003 | 2.50094 | 4.38401 | 2.2221 | 3.00168 | 1.29534 |
| 679.04277 | 5.00705 | 2.48109 | 4.38099 | 2.2109 | 3.01082 | 1.28641 |
| 680.72025 | 5.00465 | 2.46278 | 4.3783 | 2.2006 | 3.01971 | 1.2767 |
| 682.44359 | 5.00305 | 2.44585 | 4.37602 | 2.19112 | 3.02827 | 1.26622 |
| 684.13793 | 5.00239 | 2.43014 | 4.37418 | 2.18241 | 3.03641 | 1.25503 |
| 685.87864 | 5.00283 | 2.41545 | 4.37285 | 2.1744 | 3.04404 | 1.24318 |
| 687.59011 | 5.0045 | 2.4016 | 4.3721 | 2.16704 | 3.0511 | 1.23074 |
| 689.34845 | 5.00748 | 2.38835 | 4.37196 | 2.16026 | 3.05748 | 1.21775 |
| 691.0773 | 5.01184 | 2.37547 | 4.37249 | 2.154 | 3.06318 | 1.20432 |
| 692.85355 | 5.01764 | 2.36272 | 4.37376 | 2.14818 | 3.06812 | 1.19052 |
| 694.60004 | 5.02486 | 2.34984 | 4.3758 | 2.14273 | 3.07225 | 1.17644 |
| 696.39447 | 5.03347 | 2.33659 | 4.37864 | 2.13755 | 3.07558 | 1.16219 |
| 698.15889 | 5.04339 | 2.32271 | 4.38232 | 2.13254 | 3.07808 | 1.14786 |
| 699.97178 | 5.05451 | 2.30798 | 4.38687 | 2.1276 | 3.07974 | 1.13354 |
| 701.7941 | 5.06666 | 2.29216 | 4.39226 | 2.12262 | 3.08059 | 1.11935 |
| 703.58602 | 5.07967 | 2.27509 | 4.39848 | 2.11749 | 3.08067 | 1.10536 |
| 705.42724 | 5.0933 | 2.25659 | 4.40553 | 2.11212 | 3.07998 | 1.09169 |
| 707.23778 | 5.10732 | 2.23656 | 4.41334 | 2.1064 | 3.07861 | 1.07839 |
| 709.09819 | 5.12146 | 2.21494 | 4.42187 | 2.10025 | 3.0766 | 1.06559 |
| 710.92765 | 5.13546 | 2.1917 | 4.43105 | 2.09359 | 3.07404 | 1.0533 |
| 712.80754 | 5.14906 | 2.16687 | 4.4408 | 2.08636 | 3.07101 | 1.04163 |
| 714.65622 | 5.16202 | 2.14052 | 4.45105 | 2.0785 | 3.06761 | 1.03056 |
| 716.55591 | 5.1741 | 2.11276 | 4.46174 | 2.06998 | 3.06392 | 1.02016 |
| 718.4241 | 5.18512 | 2.08374 | 4.47279 | 2.06076 | 3.06006 | 1.01042 |
| 720.34391 | 5.19492 | 2.05361 | 4.48413 | 2.05082 | 3.05609 | 1.00134 |
| 722.23193 | 5.20337 | 2.02257 | 4.49568 | 2.04014 | 3.05212 | 0.9929 |
| 724.17217 | 5.2104 | 1.99081 | 4.50738 | 2.02869 | 3.04825 | 0.98506 |
| 726.12286 | 5.21594 | 1.95851 | 4.51917 | 2.01648 | 3.04452 | 0.97776 |
| 728.04133 | 5.21998 | 1.92586 | 4.53097 | 2.00348 | 3.041 | 0.97098 |
| 730.01295 | 5.22252 | 1.89304 | 4.54273 | 1.98969 | 3.03776 | 0.96461 |
| 731.95207 | 5.22359 | 1.86019 | 4.55435 | 1.97512 | 3.03479 | 0.95863 |
| 733.94495 | 5.22325 | 1.82747 | 4.56577 | 1.95977 | 3.03217 | 0.95297 |
| 735.90504 | 5.22154 | 1.79499 | 4.57692 | 1.94364 | 3.02987 | 0.94752 |
| 737.91954 | 5.21854 | 1.76286 | 4.58772 | 1.92678 | 3.02791 | 0.94225 |
| 739.90095 | 5.21432 | 1.73117 | 4.59809 | 1.9092 | 3.02626 | 0.93711 |
| 741.93741 | 5.20894 | 1.69998 | 4.60797 | 1.89095 | 3.02492 | 0.93206 |
| 743.94048 | 5.20248 | 1.66938 | 4.6173 | 1.87209 | 3.02385 | 0.92701 |
| 745.99928 | 5.195 | 1.63939 | 4.62601 | 1.85267 | 3.02302 | 0.92198 |
| 748.02437 | 5.18657 | 1.61009 | 4.63406 | 1.83274 | 3.0224 | 0.9169 |
| 750.10586 | 5.17725 | 1.58152 | 4.64142 | 1.81241 | 3.02198 | 0.9118 |
| 752.19897 | 5.1671 | 1.55368 | 4.64807 | 1.79172 | 3.02169 | 0.90666 |
| 754.25791 | 5.15618 | 1.52663 | 4.654 | 1.77077 | 3.02153 | 0.90146 |
| 756.37428 | 5.14456 | 1.5004 | 4.65921 | 1.74959 | 3.02147 | 0.89625 |
| 758.45617 | 5.13228 | 1.47501 | 4.66371 | 1.72826 | 3.02149 | 0.89102 |
| 760.59621 | 5.1194 | 1.45048 | 4.66753 | 1.70682 | 3.02161 | 0.88579 |
| 762.70144 | 5.10599 | 1.42684 | 4.67069 | 1.68532 | 3.02182 | 0.88056 |
| 764.86553 | 5.0921 | 1.40411 | 4.67319 | 1.66378 | 3.02212 | 0.87538 |
| 766.99449 | 5.0778 | 1.38228 | 4.67507 | 1.6422 | 3.02253 | 0.87023 |
| 769.18305 | 5.06314 | 1.36137 | 4.67634 | 1.6206 | 3.0231 | 0.86512 |
| 771.33615 | 5.04817 | 1.34138 | 4.67697 | 1.59899 | 3.02384 | 0.86005 |
| 773.54959 | 5.03295 | 1.32231 | 4.67698 | 1.57738 | 3.02478 | 0.85497 |
| 775.72724 | 5.01753 | 1.30416 | 4.67631 | 1.55577 | 3.02592 | 0.84989 |
| 777.966 | 5.00194 | 1.28691 | 4.67496 | 1.53417 | 3.02732 | 0.84477 |
| 780.21771 | 4.98624 | 1.27057 | 4.67287 | 1.51265 | 3.02897 | 0.83957 |
| 782.43311 | 4.97048 | 1.25512 | 4.67 | 1.49123 | 3.0309 | 0.83424 |
| 784.7108 | 4.95466 | 1.24057 | 4.66631 | 1.46999 | 3.03309 | 0.82871 |
| 786.95183 | 4.93883 | 1.22693 | 4.6618 | 1.44903 | 3.03554 | 0.82297 |
| 789.25594 | 4.92304 | 1.21419 | 4.65645 | 1.42843 | 3.03822 | 0.81693 |
| 791.52304 | 4.90732 | 1.20236 | 4.65025 | 1.40828 | 3.04111 | 0.81054 |
| 793.85403 | 4.89172 | 1.19144 | 4.64328 | 1.38871 | 3.04417 | 0.80377 |
| 796.14767 | 4.87629 | 1.18146 | 4.63553 | 1.36981 | 3.04734 | 0.79655 |
| 798.50602 | 4.8611 | 1.17242 | 4.62713 | 1.35167 | 3.05054 | 0.78886 |
| 800.82666 | 4.8462 | 1.16432 | 4.61813 | 1.33438 | 3.05375 | 0.78068 |
| 803.21285 | 4.83168 | 1.15716 | 4.60865 | 1.31802 | 3.05684 | 0.77201 |
| 805.61331 | 4.81762 | 1.15093 | 4.59882 | 1.30262 | 3.05977 | 0.7628 |
| 807.9755 | 4.80409 | 1.14561 | 4.58874 | 1.2882 | 3.06243 | 0.75311 |
| 810.40455 | 4.7912 | 1.14115 | 4.57855 | 1.27478 | 3.06478 | 0.74294 |
| 812.79497 | 4.77904 | 1.13752 | 4.56837 | 1.26233 | 3.0667 | 0.73235 |
| 815.25312 | 4.76768 | 1.13464 | 4.55829 | 1.25083 | 3.06816 | 0.72138 |
| 817.67227 | 4.75721 | 1.13244 | 4.54843 | 1.24021 | 3.06909 | 0.7101 |
| 820.16006 | 4.74769 | 1.13082 | 4.53889 | 1.23042 | 3.06944 | 0.69856 |
| 822.60846 | 4.73919 | 1.12969 | 4.52972 | 1.22138 | 3.0692 | 0.68686 |
| 825.12643 | 4.73174 | 1.12893 | 4.52099 | 1.21302 | 3.06831 | 0.67508 |
| 827.60462 | 4.72538 | 1.12842 | 4.51273 | 1.20525 | 3.06678 | 0.66329 |
| 830.15331 | 4.7201 | 1.12805 | 4.50497 | 1.19799 | 3.06463 | 0.65156 |
| 832.66183 | 4.71592 | 1.12769 | 4.49774 | 1.19116 | 3.06184 | 0.63999 |
| 835.24182 | 4.71279 | 1.12725 | 4.49104 | 1.18472 | 3.05845 | 0.62867 |
| 837.83784 | 4.71071 | 1.12662 | 4.48487 | 1.17858 | 3.0545 | 0.61763 |
| 840.39309 | 4.70961 | 1.1257 | 4.47923 | 1.17271 | 3.05 | 0.60695 |
| 843.02128 | 4.70946 | 1.12441 | 4.47411 | 1.16705 | 3.04504 | 0.59671 |
| 845.60829 | 4.71021 | 1.12266 | 4.46952 | 1.16155 | 3.03967 | 0.58694 |
| 848.26926 | 4.71179 | 1.12038 | 4.46546 | 1.15615 | 3.03393 | 0.57768 |
| 850.88863 | 4.71417 | 1.11751 | 4.46192 | 1.15084 | 3.02789 | 0.56898 |
| 853.58298 | 4.71728 | 1.11397 | 4.45891 | 1.14555 | 3.02164 | 0.56084 |
| 856.23533 | 4.72107 | 1.10969 | 4.45644 | 1.14021 | 3.01523 | 0.55329 |
| 858.9637 | 4.72546 | 1.10462 | 4.4545 | 1.13479 | 3.00874 | 0.54636 |
| 861.64964 | 4.73039 | 1.09868 | 4.45306 | 1.12919 | 3.00225 | 0.54 |
| 864.41269 | 4.73578 | 1.09179 | 4.45212 | 1.12336 | 2.9958 | 0.53423 |
| 867.13287 | 4.74151 | 1.0839 | 4.45164 | 1.11722 | 2.98949 | 0.529 |
| 869.93125 | 4.74748 | 1.07495 | 4.45155 | 1.11069 | 2.98336 | 0.52433 |
| 872.74775 | 4.75357 | 1.06488 | 4.45182 | 1.10371 | 2.97747 | 0.52012 |
| 875.52072 | 4.75964 | 1.05368 | 4.45232 | 1.09621 | 2.97188 | 0.51637 |
| 878.37359 | 4.76551 | 1.04134 | 4.453 | 1.08818 | 2.9666 | 0.51305 |
| 881.18249 | 4.77106 | 1.02786 | 4.45374 | 1.07955 | 2.96171 | 0.51004 |
| 884.07244 | 4.77612 | 1.01331 | 4.45442 | 1.07034 | 2.95721 | 0.50735 |
| 886.91796 | 4.78053 | 0.99774 | 4.45494 | 1.06055 | 2.95312 | 0.50489 |
| 889.84571 | 4.78418 | 0.98126 | 4.45517 | 1.05024 | 2.94946 | 0.50263 |
| 892.72858 | 4.78692 | 0.96397 | 4.45502 | 1.03944 | 2.94622 | 0.50049 |
| 895.69489 | 4.78867 | 0.94601 | 4.45441 | 1.02825 | 2.94341 | 0.49845 |
| 898.61584 | 4.78935 | 0.92754 | 4.45326 | 1.01674 | 2.94103 | 0.49644 |
| 901.62146 | 4.7889 | 0.9087 | 4.4515 | 1.00502 | 2.93904 | 0.49443 |
| 904.58127 | 4.78731 | 0.88965 | 4.44911 | 0.99321 | 2.93745 | 0.49237 |
| 907.62699 | 4.78457 | 0.87055 | 4.44606 | 0.9814 | 2.93626 | 0.49023 |
| 910.6933 | 4.78072 | 0.85154 | 4.44236 | 0.96972 | 2.93543 | 0.48799 |
| 913.71306 | 4.77579 | 0.83277 | 4.43802 | 0.95828 | 2.93495 | 0.48561 |
| 916.8207 | 4.76984 | 0.81437 | 4.43307 | 0.94718 | 2.93481 | 0.48305 |
| 919.88131 | 4.76296 | 0.79643 | 4.42758 | 0.93653 | 2.93501 | 0.48027 |
| 923.03112 | 4.75522 | 0.77906 | 4.4216 | 0.92641 | 2.93551 | 0.47722 |
| 926.13339 | 4.74672 | 0.76235 | 4.41521 | 0.9169 | 2.93629 | 0.47391 |
| 929.32624 | 4.73757 | 0.74634 | 4.40851 | 0.90807 | 2.93734 | 0.47027 |
| 932.47105 | 4.72786 | 0.73111 | 4.4016 | 0.89999 | 2.93859 | 0.46624 |
| 935.70782 | 4.71769 | 0.71668 | 4.39456 | 0.89268 | 2.94 | 0.46184 |
| 938.89604 | 4.70719 | 0.70308 | 4.38752 | 0.88618 | 2.94154 | 0.45701 |
| 942.17765 | 4.69644 | 0.69033 | 4.38059 | 0.88051 | 2.94314 | 0.45171 |
| 945.48227 | 4.68555 | 0.67841 | 4.37391 | 0.87565 | 2.94472 | 0.44597 |
| 948.73757 | 4.67462 | 0.66731 | 4.36757 | 0.87159 | 2.94622 | 0.43977 |
| 952.08845 | 4.66375 | 0.65701 | 4.36171 | 0.86831 | 2.94757 | 0.43312 |
| 955.38948 | 4.65302 | 0.64749 | 4.35646 | 0.86571 | 2.94873 | 0.42606 |
| 958.7876 | 4.64252 | 0.63868 | 4.35193 | 0.86377 | 2.94964 | 0.41864 |
| 962.13532 | 4.63232 | 0.63056 | 4.3482 | 0.86235 | 2.95022 | 0.41087 |
| 965.58169 | 4.62251 | 0.62304 | 4.34538 | 0.86135 | 2.95045 | 0.40284 |
| 968.9771 | 4.61314 | 0.61607 | 4.34355 | 0.86066 | 2.95034 | 0.39457 |
| 972.47275 | 4.60425 | 0.60956 | 4.34276 | 0.86012 | 2.94981 | 0.38614 |
| 975.91689 | 4.59591 | 0.60342 | 4.34305 | 0.85958 | 2.94891 | 0.3776 |
| 979.46288 | 4.58813 | 0.59758 | 4.34442 | 0.85889 | 2.94762 | 0.36898 |
| 982.9568 | 4.58092 | 0.59193 | 4.34687 | 0.85788 | 2.94595 | 0.36034 |
| 986.55422 | 4.57428 | 0.5864 | 4.35033 | 0.85638 | 2.94393 | 0.35174 |
| 990.17807 | 4.56823 | 0.58089 | 4.35475 | 0.85427 | 2.94157 | 0.34317 |
| 993.749 | 4.56272 | 0.5753 | 4.36004 | 0.85139 | 2.93888 | 0.33469 |
| 997.426 | 4.55771 | 0.56957 | 4.36609 | 0.84762 | 2.93591 | 0.3263 |
| 1001.04949 | 4.55316 | 0.56361 | 4.37276 | 0.84287 | 2.93265 | 0.31804 |
| 1004.78081 | 4.54902 | 0.55736 | 4.37991 | 0.83705 | 2.92915 | 0.30988 |
| 1008.45804 | 4.5452 | 0.55077 | 4.38742 | 0.8301 | 2.9254 | 0.30189 |
| 1012.2449 | 4.54164 | 0.54379 | 4.3951 | 0.82201 | 2.92142 | 0.29405 |
| 1015.97706 | 4.53826 | 0.53639 | 4.40282 | 0.81273 | 2.91724 | 0.28635 |
| 1019.82071 | 4.53498 | 0.52857 | 4.41041 | 0.80228 | 2.91286 | 0.27883 |
| 1023.60905 | 4.53171 | 0.52032 | 4.41775 | 0.79071 | 2.9083 | 0.27148 |
| 1027.51077 | 4.5284 | 0.51165 | 4.42469 | 0.77804 | 2.90358 | 0.26431 |
| 1031.35657 | 4.52495 | 0.50258 | 4.43109 | 0.76435 | 2.89869 | 0.25732 |
| 1035.31769 | 4.52132 | 0.49315 | 4.43683 | 0.74971 | 2.89368 | 0.25053 |
| 1039.30936 | 4.51742 | 0.48338 | 4.44181 | 0.73423 | 2.88853 | 0.24393 |
| 1043.24415 | 4.51322 | 0.47335 | 4.44596 | 0.718 | 2.88327 | 0.23753 |
| 1047.2973 | 4.50868 | 0.4631 | 4.44918 | 0.70114 | 2.87792 | 0.23135 |
| 1051.29292 | 4.50377 | 0.45268 | 4.45142 | 0.68378 | 2.87249 | 0.22534 |
| 1055.40897 | 4.49847 | 0.44215 | 4.45265 | 0.66603 | 2.86699 | 0.21957 |
| 1059.46685 | 4.49277 | 0.43158 | 4.45287 | 0.64803 | 2.86143 | 0.21398 |
| 1063.64728 | 4.48666 | 0.42101 | 4.45205 | 0.62991 | 2.85582 | 0.20859 |
| 1067.76888 | 4.48018 | 0.41052 | 4.45023 | 0.61177 | 2.85021 | 0.20341 |
| 1072.01522 | 4.47332 | 0.40013 | 4.44745 | 0.59372 | 2.84457 | 0.1984 |
| 1076.20205 | 4.46612 | 0.38989 | 4.44373 | 0.57587 | 2.83892 | 0.19358 |
| 1080.51586 | 4.45857 | 0.37984 | 4.43915 | 0.55829 | 2.83327 | 0.18895 |
| 1084.76949 | 4.45074 | 0.37002 | 4.43376 | 0.54106 | 2.82764 | 0.18448 |
| 1089.15239 | 4.44265 | 0.36044 | 4.42764 | 0.52425 | 2.82201 | 0.18017 |
| 1093.57086 | 4.43432 | 0.35111 | 4.42085 | 0.50789 | 2.81643 | 0.17604 |
| 1097.9281 | 4.42579 | 0.34209 | 4.41347 | 0.49203 | 2.81085 | 0.17205 |
| 1102.41821 | 4.41708 | 0.33333 | 4.40556 | 0.47668 | 2.80533 | 0.1682 |
| 1106.84638 | 4.40824 | 0.32488 | 4.39718 | 0.46188 | 2.79985 | 0.16449 |
| 1111.40988 | 4.39929 | 0.31672 | 4.38841 | 0.44762 | 2.7944 | 0.16091 |
| 1115.91073 | 4.39024 | 0.30887 | 4.3793 | 0.43392 | 2.789 | 0.15748 |
| 1120.54943 | 4.38113 | 0.30129 | 4.36991 | 0.42075 | 2.78364 | 0.15415 |
| 1125.12476 | 4.37197 | 0.29401 | 4.36028 | 0.40813 | 2.77832 | 0.15094 |
| 1129.84055 | 4.36279 | 0.28701 | 4.35048 | 0.39603 | 2.77308 | 0.14783 |
| 1134.49222 | 4.35361 | 0.28026 | 4.34051 | 0.38444 | 2.76787 | 0.14486 |
| 1139.28703 | 4.34445 | 0.27379 | 4.33044 | 0.37333 | 2.76271 | 0.14196 |
| 1144.12253 | 4.33531 | 0.26756 | 4.32029 | 0.36272 | 2.75762 | 0.13918 |
| 1148.8928 | 4.3262 | 0.26158 | 4.31008 | 0.35257 | 2.75259 | 0.13647 |
| 1153.81037 | 4.31713 | 0.25583 | 4.29985 | 0.34285 | 2.7476 | 0.13386 |
| 1158.66193 | 4.30813 | 0.25029 | 4.28963 | 0.33355 | 2.74267 | 0.13133 |
| 1163.66366 | 4.29919 | 0.24498 | 4.27942 | 0.32466 | 2.73781 | 0.1289 |
| 1168.59862 | 4.29032 | 0.23985 | 4.26924 | 0.31614 | 2.733 | 0.12653 |
| 1173.6867 | 4.28152 | 0.23493 | 4.25912 | 0.308 | 2.72825 | 0.12424 |
| 1178.70722 | 4.27281 | 0.23018 | 4.24906 | 0.3002 | 2.72354 | 0.12201 |
| 1183.8839 | 4.26416 | 0.2256 | 4.23907 | 0.29272 | 2.71891 | 0.11985 |
| 1188.99223 | 4.25562 | 0.22119 | 4.22915 | 0.28555 | 2.71434 | 0.11774 |
| 1194.25985 | 4.24717 | 0.21694 | 4.21933 | 0.27868 | 2.70981 | 0.11571 |
| 1199.45831 | 4.2388 | 0.21284 | 4.2096 | 0.27209 | 2.70535 | 0.11372 |
| 1204.81928 | 4.23054 | 0.20887 | 4.19998 | 0.26578 | 2.70093 | 0.1118 |
| 1210.22838 | 4.22235 | 0.20505 | 4.19046 | 0.2597 | 2.69657 | 0.1099 |
| 1215.5671 | 4.21427 | 0.20135 | 4.18105 | 0.25387 | 2.69226 | 0.10807 |
| 1221.07336 | 4.20628 | 0.19778 | 4.17174 | 0.24827 | 2.68799 | 0.10629 |
| 1226.50841 | 4.19839 | 0.19431 | 4.16256 | 0.24287 | 2.68379 | 0.10455 |
| 1232.11447 | 4.19058 | 0.19096 | 4.15348 | 0.23768 | 2.67962 | 0.10285 |
| 1237.64847 | 4.18289 | 0.18772 | 4.14452 | 0.23268 | 2.67551 | 0.1012 |
| 1243.35706 | 4.17527 | 0.18456 | 4.13568 | 0.22787 | 2.67144 | 0.09959 |
| 1248.99275 | 4.16775 | 0.18151 | 4.12695 | 0.22323 | 2.66742 | 0.09802 |
| 1254.80672 | 4.16032 | 0.17856 | 4.11833 | 0.21874 | 2.66344 | 0.09649 |
| 1260.54691 | 4.15299 | 0.17568 | 4.10984 | 0.21442 | 2.65952 | 0.095 |
| 1266.46921 | 4.14574 | 0.17288 | 4.10145 | 0.21025 | 2.65563 | 0.09354 |
| 1272.31685 | 4.13859 | 0.17017 | 4.09318 | 0.20622 | 2.65177 | 0.09211 |
| 1278.35052 | 4.13153 | 0.16753 | 4.08503 | 0.20232 | 2.64799 | 0.09073 |
| 1284.44168 | 4.12455 | 0.16496 | 4.07697 | 0.19855 | 2.64422 | 0.08936 |
| 1290.45686 | 4.11766 | 0.16246 | 4.06904 | 0.19491 | 2.6405 | 0.08805 |
| 1296.66423 | 4.11085 | 0.16003 | 4.06122 | 0.19137 | 2.63684 | 0.08677 |
| 1302.7947 | 4.10413 | 0.15766 | 4.0535 | 0.18795 | 2.63319 | 0.0855 |
| 1309.12162 | 4.09749 | 0.15535 | 4.04589 | 0.18463 | 2.62962 | 0.08427 |
| 1315.37074 | 4.09093 | 0.15309 | 4.03838 | 0.18142 | 2.62606 | 0.08309 |
| 1321.8207 | 4.08445 | 0.1509 | 4.03097 | 0.17829 | 2.62256 | 0.0819 |
| 1328.19195 | 4.07805 | 0.14876 | 4.02367 | 0.17526 | 2.61909 | 0.08077 |
| 1334.76857 | 4.07173 | 0.14667 | 4.01647 | 0.17233 | 2.61567 | 0.07965 |
| 1341.26555 | 4.06549 | 0.14463 | 4.00935 | 0.16947 | 2.61227 | 0.07855 |
| 1347.97261 | 4.05933 | 0.14263 | 4.00235 | 0.16669 | 2.60893 | 0.0775 |
| 1354.59908 | 4.05323 | 0.14068 | 3.99542 | 0.16399 | 2.60562 | 0.07645 |
| 1361.44049 | 4.0472 | 0.13877 | 3.9886 | 0.16136 | 2.60236 | 0.07543 |
| 1368.35136 | 4.04126 | 0.13691 | 3.98187 | 0.15879 | 2.59912 | 0.07443 |
| 1375.18022 | 4.03539 | 0.13508 | 3.97523 | 0.15631 | 2.59592 | 0.07346 |
| 1382.23164 | 4.02957 | 0.1333 | 3.96867 | 0.15388 | 2.59277 | 0.07249 |
| 1389.20009 | 4.02383 | 0.13155 | 3.96222 | 0.15151 | 2.58966 | 0.07155 |
| 1396.3964 | 4.01817 | 0.12984 | 3.95584 | 0.14921 | 2.58656 | 0.07063 |
| 1403.50877 | 4.01256 | 0.12816 | 3.94954 | 0.14695 | 2.58352 | 0.06973 |
| 1410.85448 | 4.00702 | 0.12652 | 3.94333 | 0.14476 | 2.58049 | 0.06886 |
| 1418.11528 | 4.00155 | 0.12491 | 3.9372 | 0.14261 | 2.57752 | 0.06799 |
| 1425.61508 | 3.99614 | 0.12333 | 3.93114 | 0.14053 | 2.57457 | 0.06714 |
| 1433.02901 | 3.99078 | 0.12178 | 3.92517 | 0.13849 | 2.57165 | 0.0663 |
| 1440.68781 | 3.98549 | 0.12026 | 3.91928 | 0.13649 | 2.56877 | 0.06548 |
| 1448.42892 | 3.98028 | 0.11877 | 3.91345 | 0.13454 | 2.56593 | 0.06469 |
| 1456.08267 | 3.97511 | 0.11731 | 3.90771 | 0.13264 | 2.56312 | 0.06389 |
| 1463.99055 | 3.97 | 0.11587 | 3.90203 | 0.13077 | 2.56033 | 0.06312 |
| 1471.81009 | 3.96496 | 0.11445 | 3.89642 | 0.12894 | 2.55757 | 0.06236 |
| 1479.8902 | 3.95996 | 0.11307 | 3.8909 | 0.12716 | 2.55486 | 0.06161 |
| 1487.88097 | 3.95503 | 0.11171 | 3.88544 | 0.1254 | 2.55216 | 0.06089 |
| 1496.139 | 3.95015 | 0.11038 | 3.88004 | 0.1237 | 2.54949 | 0.06015 |
| 1504.30668 | 3.94533 | 0.10905 | 3.87471 | 0.12202 | 2.54687 | 0.05945 |
| 1512.74857 | 3.94056 | 0.10776 | 3.86946 | 0.12038 | 2.54426 | 0.05874 |
| 1521.09912 | 3.93584 | 0.10648 | 3.86426 | 0.11877 | 2.54169 | 0.05807 |
| 1529.73106 | 3.93118 | 0.10524 | 3.85912 | 0.11719 | 2.53915 | 0.05738 |
| 1538.27069 | 3.92657 | 0.10401 | 3.85406 | 0.11564 | 2.53664 | 0.05673 |
| 1547.09919 | 3.922 | 0.10279 | 3.84906 | 0.11413 | 2.53414 | 0.05607 |
| 1556.02961 | 3.91749 | 0.1016 | 3.84411 | 0.11264 | 2.53167 | 0.05542 |
| 1564.86623 | 3.91303 | 0.10042 | 3.83923 | 0.11118 | 2.52925 | 0.05478 |
| 1574.00355 | 3.90861 | 0.09927 | 3.8344 | 0.10974 | 2.52684 | 0.05416 |
| 1583.04609 | 3.90426 | 0.09814 | 3.82963 | 0.10834 | 2.52445 | 0.05354 |
| 1592.39759 | 3.89994 | 0.09701 | 3.82492 | 0.10696 | 2.5221 | 0.05293 |
| 1601.65332 | 3.89566 | 0.0959 | 3.82027 | 0.10559 | 2.51977 | 0.05235 |
| 1611.22661 | 3.89145 | 0.09481 | 3.81566 | 0.10427 | 2.51745 | 0.05176 |
| 1620.70318 | 3.88727 | 0.09374 | 3.81112 | 0.10295 | 2.51518 | 0.05117 |
| 1630.50625 | 3.88314 | 0.09268 | 3.80663 | 0.10166 | 2.51292 | 0.0506 |
| 1640.21164 | 3.87906 | 0.09163 | 3.80219 | 0.1004 | 2.5107 | 0.05003 |
| 1650.25286 | 3.87501 | 0.09061 | 3.79781 | 0.09915 | 2.50848 | 0.04947 |
| 1660.19547 | 3.87101 | 0.08959 | 3.79348 | 0.09793 | 2.50629 | 0.04892 |
| 1670.48363 | 3.86706 | 0.08859 | 3.78919 | 0.09672 | 2.50414 | 0.04838 |
| 1680.90009 | 3.86316 | 0.08761 | 3.78496 | 0.09554 | 2.502 | 0.04784 |
| 1691.21658 | 3.85928 | 0.08664 | 3.78078 | 0.09437 | 2.49989 | 0.04732 |
| 1701.89404 | 3.85546 | 0.08567 | 3.77665 | 0.09322 | 2.4978 | 0.0468 |
| 1712.47065 | 3.85167 | 0.08472 | 3.77256 | 0.09209 | 2.49572 | 0.04628 |
| 1723.41904 | 3.84792 | 0.08379 | 3.76852 | 0.09098 | 2.49367 | 0.04578 |
| 1734.26573 | 3.84421 | 0.08286 | 3.76453 | 0.08988 | 2.49166 | 0.04527 |
| 1745.4955 | 3.84055 | 0.08194 | 3.76058 | 0.08879 | 2.48964 | 0.04477 |
| 1756.62275 | 3.83692 | 0.08104 | 3.75669 | 0.08774 | 2.48766 | 0.04428 |
| 1768.14487 | 3.83333 | 0.08015 | 3.75283 | 0.08668 | 2.4857 | 0.04379 |
| 1779.56372 | 3.82978 | 0.07927 | 3.74902 | 0.08565 | 2.48376 | 0.04332 |
| 1791.38977 | 3.82627 | 0.07841 | 3.74525 | 0.08463 | 2.48184 | 0.04285 |
| 1803.11182 | 3.8228 | 0.07755 | 3.74152 | 0.08363 | 2.47994 | 0.04238 |
| 1815.25399 | 3.81936 | 0.07669 | 3.73784 | 0.08263 | 2.47806 | 0.04193 |
| 1827.5608 | 3.81596 | 0.07585 | 3.7342 | 0.08165 | 2.47621 | 0.04145 |
| 1839.76261 | 3.81259 | 0.07503 | 3.7306 | 0.0807 | 2.47437 | 0.04102 |
| 1852.40514 | 3.80927 | 0.0742 | 3.72704 | 0.07974 | 2.47254 | 0.04057 |
| 1864.9421 | 3.80597 | 0.0734 | 3.72353 | 0.0788 | 2.47075 | 0.04013 |
| 1877.93427 | 3.80272 | 0.07259 | 3.72006 | 0.07788 | 2.46896 | 0.03969 |
| 1890.82037 | 3.79949 | 0.0718 | 3.71663 | 0.07696 | 2.46719 | 0.03926 |
| 1904.1769 | 3.79631 | 0.07102 | 3.71323 | 0.07607 | 2.46546 | 0.03884 |
| 1917.42694 | 3.79316 | 0.07023 | 3.70987 | 0.07516 | 2.46373 | 0.0384 |
| 1931.16337 | 3.79003 | 0.06947 | 3.70655 | 0.07429 | 2.46202 | 0.038 |
| 1944.79297 | 3.78694 | 0.06871 | 3.70327 | 0.07342 | 2.46033 | 0.03758 |
| 1958.92575 | 3.78389 | 0.06796 | 3.70002 | 0.07257 | 2.45865 | 0.03717 |
| 1972.95147 | 3.78088 | 0.06721 | 3.69682 | 0.07171 | 2.45702 | 0.03675 |
| 1987.498 | 3.77789 | 0.06648 | 3.69363 | 0.07088 | 2.45537 | 0.03635 |
| 2002.26062 | 3.77493 | 0.06575 | 3.6905 | 0.07004 | 2.45375 | 0.03597 |
| 2016.91607 | 3.77201 | 0.06502 | 3.68741 | 0.06924 | 2.45216 | 0.03556 |
| 2032.12062 | 3.76912 | 0.06431 | 3.68434 | 0.06842 | 2.45058 | 0.03518 |
| 2047.21809 | 3.76625 | 0.0636 | 3.68131 | 0.06763 | 2.449 | 0.03479 |
| 2062.88471 | 3.76342 | 0.06289 | 3.67831 | 0.06684 | 2.44746 | 0.0344 |
| 2078.44452 | 3.76062 | 0.06221 | 3.67536 | 0.06606 | 2.44593 | 0.03404 |
| 2094.59459 | 3.75786 | 0.06151 | 3.67243 | 0.06528 | 2.44441 | 0.03365 |
| 2110.6383 | 3.75512 | 0.06084 | 3.66953 | 0.06452 | 2.44291 | 0.03328 |
| 2127.29456 | 3.7524 | 0.06016 | 3.66668 | 0.06376 | 2.44143 | 0.03291 |
| 2143.84509 | 3.74973 | 0.0595 | 3.66385 | 0.06302 | 2.43997 | 0.03256 |
| 2161.03172 | 3.74707 | 0.05883 | 3.66106 | 0.06228 | 2.43851 | 0.03219 |
| 2178.49613 | 3.74446 | 0.05817 | 3.65829 | 0.06155 | 2.43709 | 0.03184 |
| 2195.85621 | 3.74187 | 0.05752 | 3.65557 | 0.06082 | 2.43567 | 0.03147 |
| 2213.89038 | 3.73931 | 0.05687 | 3.65286 | 0.0601 | 2.43427 | 0.03112 |
| 2231.82145 | 3.73677 | 0.05624 | 3.6502 | 0.05939 | 2.43287 | 0.03079 |
| 2250.45372 | 3.73426 | 0.05561 | 3.64757 | 0.0587 | 2.43151 | 0.03043 |
| 2268.98445 | 3.73179 | 0.05497 | 3.64496 | 0.058 | 2.43015 | 0.03008 |
| 2288.24506 | 3.72934 | 0.05435 | 3.64239 | 0.05731 | 2.4288 | 0.02975 |
| 2307.40603 | 3.72691 | 0.05373 | 3.63984 | 0.05662 | 2.42748 | 0.02941 |
| 2327.32733 | 3.72452 | 0.05312 | 3.63732 | 0.05595 | 2.42616 | 0.02908 |
| 2347.15124 | 3.72214 | 0.05251 | 3.63484 | 0.05528 | 2.42488 | 0.02874 |
| 2367.76781 | 3.71981 | 0.05191 | 3.63238 | 0.05462 | 2.42359 | 0.02841 |
| 2388.28968 | 3.71749 | 0.05131 | 3.62995 | 0.05397 | 2.42233 | 0.02809 |
| 2409.63855 | 3.71521 | 0.05071 | 3.62755 | 0.05331 | 2.42107 | 0.02776 |
| 2431.37255 | 3.71294 | 0.05012 | 3.62519 | 0.05267 | 2.41982 | 0.02744 |
| 2453.01682 | 3.71071 | 0.04955 | 3.62285 | 0.05203 | 2.4186 | 0.02712 |
| 2475.54402 | 3.7085 | 0.04896 | 3.62053 | 0.0514 | 2.4174 | 0.02681 |
| 2497.9855 | 3.70631 | 0.04839 | 3.61824 | 0.05077 | 2.4162 | 0.02649 |
| 2521.35014 | 3.70416 | 0.04781 | 3.61599 | 0.05015 | 2.41501 | 0.02617 |
| 2544.6337 | 3.70202 | 0.04724 | 3.61376 | 0.04953 | 2.41385 | 0.02587 |
| 2568.88336 | 3.69992 | 0.04669 | 3.61155 | 0.04893 | 2.41269 | 0.02555 |
| 2593.0573 | 3.69783 | 0.04612 | 3.60938 | 0.04832 | 2.41156 | 0.02525 |
| 2618.24324 | 3.69576 | 0.04557 | 3.60723 | 0.04771 | 2.41042 | 0.02495 |
| 2643.35962 | 3.69374 | 0.04502 | 3.60511 | 0.04711 | 2.40932 | 0.02465 |
| 2669.53714 | 3.69173 | 0.04448 | 3.60301 | 0.04653 | 2.40821 | 0.02435 |
| 2695.65217 | 3.68975 | 0.04393 | 3.60093 | 0.04593 | 2.40713 | 0.02405 |
| 2722.88098 | 3.68777 | 0.04339 | 3.5989 | 0.04536 | 2.40605 | 0.02375 |
| 2750.66548 | 3.68584 | 0.04285 | 3.59687 | 0.04477 | 2.40498 | 0.02347 |
| 2778.40018 | 3.68394 | 0.04232 | 3.59488 | 0.0442 | 2.40394 | 0.02317 |
| 2807.3353 | 3.68204 | 0.0418 | 3.59291 | 0.04364 | 2.4029 | 0.02289 |
| 2836.23056 | 3.68018 | 0.04126 | 3.59097 | 0.04307 | 2.40188 | 0.02261 |
| 2866.38927 | 3.67834 | 0.04074 | 3.58905 | 0.0425 | 2.40087 | 0.0223 |
| 2896.5195 | 3.67651 | 0.04023 | 3.58715 | 0.04196 | 2.39987 | 0.02202 |
| 2927.98111 | 3.67472 | 0.0397 | 3.58529 | 0.04141 | 2.39889 | 0.02174 |
| 2959.42721 | 3.67295 | 0.03919 | 3.58344 | 0.04085 | 2.39793 | 0.02148 |
| 2992.27799 | 3.6712 | 0.03869 | 3.58162 | 0.0403 | 2.39697 | 0.02119 |
| 3025.12808 | 3.66946 | 0.03818 | 3.57983 | 0.03976 | 2.39603 | 0.02091 |
| 3059.46213 | 3.66777 | 0.03768 | 3.57806 | 0.03923 | 2.39508 | 0.02065 |
| 3093.81238 | 3.66607 | 0.03718 | 3.57631 | 0.0387 | 2.39416 | 0.02036 |
| 3129.73246 | 3.66442 | 0.03668 | 3.57458 | 0.03817 | 2.39326 | 0.0201 |
| 3166.49642 | 3.66277 | 0.03619 | 3.57289 | 0.03764 | 2.39236 | 0.01981 |
| 3203.30664 | 3.66116 | 0.0357 | 3.57122 | 0.03712 | 2.39146 | 0.01955 |
| 3241.83007 | 3.65957 | 0.03521 | 3.56956 | 0.0366 | 2.3906 | 0.01928 |
| 3280.42328 | 3.65799 | 0.03472 | 3.56793 | 0.03609 | 2.38974 | 0.01902 |
| 3320.83557 | 3.65644 | 0.03424 | 3.56632 | 0.03557 | 2.38888 | 0.01875 |
| 3361.34454 | 3.65492 | 0.03376 | 3.56473 | 0.03507 | 2.38804 | 0.01849 |
| 3403.78809 | 3.65341 | 0.03328 | 3.56317 | 0.03456 | 2.38722 | 0.01822 |
| 3446.35909 | 3.65193 | 0.0328 | 3.56164 | 0.03406 | 2.3864 | 0.01798 |
| 3490.99099 | 3.65046 | 0.03232 | 3.56012 | 0.03355 | 2.38561 | 0.01771 |
| 3535.78557 | 3.64902 | 0.03186 | 3.55862 | 0.03306 | 2.38481 | 0.01744 |
| 3582.77954 | 3.64759 | 0.03139 | 3.55714 | 0.03255 | 2.38403 | 0.0172 |
| 3631.03953 | 3.64618 | 0.03092 | 3.55569 | 0.03208 | 2.38327 | 0.01695 |
| 3679.52522 | 3.64481 | 0.03045 | 3.55426 | 0.03158 | 2.38252 | 0.01668 |
| 3730.44525 | 3.64345 | 0.03 | 3.55285 | 0.03109 | 2.38176 | 0.01644 |
| 3781.64074 | 3.64211 | 0.02954 | 3.55147 | 0.03061 | 2.38102 | 0.01619 |
| 3835.44695 | 3.64079 | 0.02909 | 3.55011 | 0.03013 | 2.38031 | 0.01594 |
| 3889.58595 | 3.63949 | 0.02863 | 3.54877 | 0.02964 | 2.37959 | 0.01567 |
| 3946.53087 | 3.63821 | 0.02817 | 3.54744 | 0.02918 | 2.37889 | 0.01543 |
| 4003.87472 | 3.63696 | 0.02773 | 3.54614 | 0.02871 | 2.3782 | 0.0152 |
| 4064.24123 | 3.63572 | 0.02727 | 3.54487 | 0.02822 | 2.37752 | 0.01495 |
| 4125.08317 | 3.6345 | 0.02683 | 3.54361 | 0.02777 | 2.37687 | 0.0147 |
| 4189.18919 | 3.6333 | 0.02638 | 3.54238 | 0.0273 | 2.3762 | 0.01446 |
| 4253.85935 | 3.63213 | 0.02594 | 3.54116 | 0.02683 | 2.37556 | 0.01421 |
| 4322.06344 | 3.63097 | 0.0255 | 3.53996 | 0.02637 | 2.37493 | 0.01398 |
| 4392.49026 | 3.62982 | 0.02506 | 3.53878 | 0.02591 | 2.3743 | 0.01373 |
| 4463.64291 | 3.62871 | 0.02462 | 3.53763 | 0.02545 | 2.37369 | 0.01348 |
| 4538.79941 | 3.62761 | 0.02419 | 3.5365 | 0.025 | 2.37309 | 0.01325 |
| 4614.81206 | 3.62654 | 0.02376 | 3.53539 | 0.02454 | 2.3725 | 0.01302 |
| 4695.19122 | 3.62547 | 0.02332 | 3.53429 | 0.02409 | 2.37191 | 0.01277 |
| 4776.57935 | 3.62443 | 0.02289 | 3.53322 | 0.02365 | 2.37134 | 0.01255 |
| 4862.7451 | 3.62341 | 0.02245 | 3.53217 | 0.02319 | 2.37079 | 0.01232 |
| 4950.0998 | 3.62241 | 0.02203 | 3.53114 | 0.02274 | 2.37024 | 0.01207 |
| 5042.70028 | 3.62143 | 0.02161 | 3.53013 | 0.02231 | 2.36969 | 0.01184 |
| 5136.70257 | 3.62046 | 0.02117 | 3.52913 | 0.02186 | 2.36916 | 0.01161 |
| 5236.48649 | 3.61952 | 0.02075 | 3.52815 | 0.02141 | 2.36866 | 0.01138 |
| 5337.9251 | 3.61859 | 0.02034 | 3.5272 | 0.02098 | 2.36815 | 0.01115 |
| 5445.76197 | 3.61769 | 0.01992 | 3.52628 | 0.02055 | 2.36764 | 0.01092 |
| 5558.04572 | 3.61681 | 0.01949 | 3.52535 | 0.02011 | 2.36715 | 0.01069 |
| 5672.46112 | 3.61593 | 0.01907 | 3.52446 | 0.01968 | 2.36669 | 0.01046 |
| 5794.39252 | 3.61509 | 0.01866 | 3.52359 | 0.01924 | 2.36622 | 0.01023 |
| 5918.85442 | 3.61425 | 0.01825 | 3.52273 | 0.01881 | 2.36576 | 0.01 |
| 6051.73255 | 3.61344 | 0.01782 | 3.52189 | 0.01838 | 2.36531 | 0.00977 |
| 6187.62475 | 3.61264 | 0.01741 | 3.52108 | 0.01795 | 2.36489 | 0.00954 |
| 6332.99285 | 3.61187 | 0.017 | 3.52029 | 0.01753 | 2.36446 | 0.00933 |
| 6481.9655 | 3.61112 | 0.01659 | 3.5195 | 0.0171 | 2.36404 | 0.00909 |
| 6641.67113 | 3.61038 | 0.01619 | 3.51875 | 0.01668 | 2.36364 | 0.00886 |
| 6805.70801 | 3.60966 | 0.01578 | 3.51801 | 0.01626 | 2.36326 | 0.00865 |
| 6981.98198 | 3.60895 | 0.01536 | 3.51728 | 0.01584 | 2.36285 | 0.00842 |
| 7163.48931 | 3.60827 | 0.01497 | 3.51658 | 0.01541 | 2.36249 | 0.00819 |
| 7359.05045 | 3.6076 | 0.01455 | 3.5159 | 0.01499 | 2.36213 | 0.00798 |
| 7565.58877 | 3.60697 | 0.01415 | 3.51523 | 0.01458 | 2.36177 | 0.00775 |
| 7779.17189 | 3.60633 | 0.01375 | 3.51458 | 0.01416 | 2.36143 | 0.00754 |
| 8010.33592 | 3.60573 | 0.01334 | 3.51396 | 0.01375 | 2.36109 | 0.00731 |
| 8250.16633 | 3.60513 | 0.01294 | 3.51334 | 0.01332 | 2.36077 | 0.0071 |
| 8510.6383 | 3.60456 | 0.01254 | 3.51276 | 0.01291 | 2.36045 | 0.00688 |
| 8781.86969 | 3.604 | 0.01214 | 3.51219 | 0.0125 | 2.36014 | 0.00665 |
| 9077.59883 | 3.60346 | 0.01174 | 3.51163 | 0.01209 | 2.35984 | 0.00644 |
| 9386.82816 | 3.60295 | 0.01134 | 3.5111 | 0.01168 | 2.35956 | 0.00621 |
| 9725.4902 | 3.60243 | 0.01095 | 3.51059 | 0.01127 | 2.35929 | 0.006 |
| 10081.30081 | 3.60196 | 0.01055 | 3.51009 | 0.01085 | 2.35903 | 0.00579 |
| 10472.97297 | 3.60149 | 0.01015 | 3.5096 | 0.01044 | 2.35878 | 0.00557 |
| 10896.30931 | 3.60104 | 0.00976 | 3.50915 | 0.01003 | 2.35852 | 0.00534 |
| 11344.92223 | 3.60061 | 0.00936 | 3.5087 | 0.00963 | 2.35829 | 0.00513 |
| 11843.36199 | 3.60019 | 0.00897 | 3.50827 | 0.00922 | 2.35806 | 0.00492 |
| 12375.2495 | 3.5998 | 0.00857 | 3.50787 | 0.00882 | 2.35784 | 0.00471 |
| 12970.7113 | 3.59943 | 0.00818 | 3.50749 | 0.00841 | 2.35763 | 0.00447 |
| 13611.41603 | 3.59906 | 0.00778 | 3.50712 | 0.00801 | 2.35744 | 0.00426 |
| 14335.26012 | 3.59872 | 0.00739 | 3.50676 | 0.0076 | 2.35725 | 0.00405 |
| 15121.95122 | 3.5984 | 0.007 | 3.50643 | 0.0072 | 2.35708 | 0.00384 |
| 16020.67183 | 3.59809 | 0.00661 | 3.50612 | 0.0068 | 2.35691 | 0.00363 |
| 17009.60219 | 3.5978 | 0.00623 | 3.50582 | 0.00639 | 2.35674 | 0.00342 |
| 18155.19766 | 3.59753 | 0.00582 | 3.50554 | 0.00599 | 2.35659 | 0.0032 |
| 19435.73668 | 3.59728 | 0.00543 | 3.50527 | 0.00559 | 2.35646 | 0.00297 |
| 20945.94595 | 3.59704 | 0.00505 | 3.50503 | 0.00519 | 2.35633 | 0.00276 |
| 22710.62271 | 3.59682 | 0.00466 | 3.50481 | 0.00479 | 2.35621 | 0.00255 |
| 24750.499 | 3.59663 | 0.00427 | 3.5046 | 0.00439 | 2.3561 | 0.00233 |
| 27252.74725 | 3.59643 | 0.00388 | 3.50441 | 0.00399 | 2.35599 | 0.00212 |
| 30243.90244 | 3.59626 | 0.00349 | 3.50424 | 0.0036 | 2.35591 | 0.00191 |
| 34065.93407 | 3.59612 | 0.0031 | 3.5041 | 0.0032 | 2.35582 | 0.0017 |
| 38871.47335 | 3.59598 | 0.00271 | 3.50396 | 0.0028 | 2.35576 | 0.00149 |
| 45421.24542 | 3.59587 | 0.00232 | 3.50384 | 0.0024 | 2.3557 | 0.00127 |
| 54385.96491 | 3.59578 | 0.00193 | 3.50374 | 0.002 | 2.35563 | 0.00106 |
| 68131.86813 | 3.59571 | 0.00156 | 3.50366 | 0.0016 | 2.35559 | 8.49044E-4 |
| 90510.94891 | 3.59564 | 0.00117 | 3.5036 | 0.0012 | 2.35557 | 6.36789E-4 |
| 136263.73626 | 3.59559 | 7.78731E-4 | 3.50356 | 7.99188E-4 | 2.35555 | 4.2453E-4 |

**Supplementary references**

1. Lin, Z. *et al.* Planar‐coordination PdSe 2 nanosheets as highly active electrocatalyst for hydrogen evolution reaction. *Adv. Funct. Mater.* **31**, 2102321 (2021).

2. Yu, J. *et al.* Giant nonlinear optical activity in two-dimensional palladium diselenide. *Nat. Commun.* **12**, 1083 (2021).

3. Nishiyama, W. *et al.* Quantitative determination of contradictory bandgap values of bulk PdSe2 from electrical transport properties. *Adv. Funct. Mater.* **32**, 2108061 (2022).

4. Lu, L.-S. *et al.* Layer-dependent and in-plane anisotropic properties of low-temperature synthesized few-layer PdSe2 single crystals. *ACS Nano* **14**, 4963–4972 (2020).

5. Jiang, S. *et al.* Anisotropic growth and scanning tunneling microscopy identification of ultrathin even-layered PdSe2 ribbons. *Small* **15**, e1902789 (2019).

6. Kresse, G. & Hafner, J. Ab initio molecular dynamics for liquid metals. *Phys. Rev. B* **47**, 558–561 (1993).

7. Irvine, C. T. *et al.* Diselenide dianion’s dual powers: PdSe2polymorph control and pd3Se10superatomic crystal creation. *Chem. Mater.* **35**, 4404–4411 (2023).

8. Togo, A., Oba, F. & Tanaka, I. First-principles calculations of the ferroelastic transition between rutile-type andCaCl2-typeSiO2at high pressures. *Phys. Rev. B Condens. Matter Mater. Phys.* **78**, (2008).

9. Togo, A. & Tanaka, I. First principles phonon calculations in materials science. *Scr. Mater.* **108**, 1–5 (2015).

10. Oyedele, A. D. *et al.* PdSe2: Pentagonal two-dimensional layers with high air stability for electronics. *J. Am. Chem. Soc.* **139**, 14090–14097 (2017).

11. Ermolaev, G. A., Yakubovsky, D. I., Stebunov, Y. V., Arsenin, A. V. & Volkov, V. S. Spectral ellipsometry of monolayer transition metal dichalcogenides: Analysis of excitonic peaks in dispersion. *J. Vac. Sci. Technol. B Nanotechnol. Microelectron.* **38**, 014002 (2020).

12. Ermolaev, G. *et al.* Topological phase singularities in atomically thin high-refractive-index materials. *Nat. Commun.* **13**, 2049 (2022).

13. Shishkin, M. & Kresse, G. Self-consistent GW calculations for semiconductors and insulators. *Phys. Rev. B* **75**, 235102 (2007).

14. Kresse, G. & Furthmüller, J. Efficient iterative schemes for ab initio total-energy calculations using a plane-wave basis set. *Phys. Rev. B* **54**, 11169–11186 (1996).

15. Kresse, G. & Furthmüller, J. Efficiency of ab-initio total energy calculations for metals and semiconductors using a plane-wave basis set. *Comput. Mater. Sci.* **6**, 15–50 (1996).

16. Sander, T., Maggio, E. & Kresse, G. Beyond the Tamm-Dancoff approximation for extended systems using exact diagonalization. *Phys. Rev. B* **92**, 045209 (2015).

17. Perdew, J. P., Burke, K. & Ernzerhof, M. Generalized gradient approximation made simple. *Phys. Rev. Lett.* **77**, 3865–3868 (1996).

18. Passler, N. C. & Paarmann, A. Generalized 4 × 4 matrix formalism for light propagation in anisotropic stratified media: study of surface phonon polaritons in polar dielectric heterostructures: erratum. *J. Opt. Soc. Am. B* **36**, 3246 (2019).

19. Qiu, C.-W., Li, L.-W., Yeo, T.-S. & Zouhdi, S. Scattering by rotationally symmetric anisotropic spheres: potential formulation and parametric studies. *Phys. Rev. E* **75**, 026609 (2007).

20. Panova, D. A. *et al.* Broadband optical properties of TiC MXene revisited. *Opt. Lett.* **49**, 25–28 (2024).

21. Rastinehad, A. R. *et al.* Gold nanoshell-localized photothermal ablation of prostate tumors in a clinical pilot device study. *Proc. Natl. Acad. Sci. U. S. A.* **116**, 18590–18596 (2019).
